# Supplementary material for: Two intensified fluorescence colors’ switching achieved by branched dye nanoaggregates
Source: Royal Society of Chemistry journal article supplement (doi:10.1039/c7nr02169k), 2017-01-01

## Electronic supplementary information (ESI)

### Two intensified fluorescence colors switching achieved by branched dyes nano aggregates

Ge Ding<sup>1,2</sup>, Yao Lu<sup>1</sup>, Jihong Su<sup>1</sup>, Xiaozhuan Qin<sup>1</sup>, Ziping Luo<sup>1</sup>, Fang Gao<sup>\*1</sup>, Lingyun Chen<sup>\*1</sup>, Hongru Li<sup>\*1</sup>

<sup>1</sup>College of Chemistry and Chemical Engineering, Chongqing University, Chongqing, China, 400044

<sup>2</sup>College of Material and Chemical Engineering, Chongqing University of Arts and Science, Chongqing, China, 402160

Tel & Fax: 86-23-65106479, Emails: fanggao1971@gmail.com, lychen@cqu.edu.cn, hrli@cqu.edu.cn

### Table of contents

| Items                                                                                        | pages         |
|----------------------------------------------------------------------------------------------|---------------|
| 1. Supporting Tables and Figures                                                             | pages S2-S15  |
| 2. X-ray single crystal diffraction data of target C1                                        | pages S16-S21 |
| 3. Synthesis of intermediates and final products                                             | pages S22-S39 |
| 4. The characterization of the intermediates<br>( <sup>1</sup> H-NMR)                        | pages S40-S46 |
| 5. The characterization of the final compounds<br>( <sup>1</sup> H-NMR, <sup>13</sup> C-NMR) | pages S47-S62 |

## 1. Supporting Tables and Figures

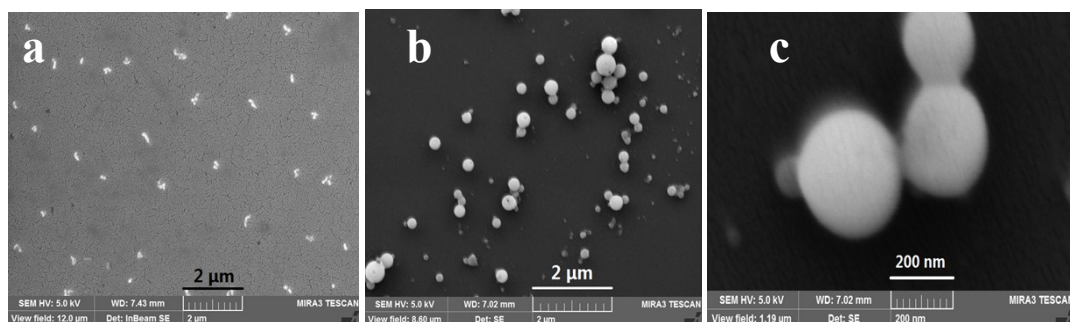

**Figure S1** SEM images of C3 aggregates in DMF/H<sub>2</sub>O (60% water sample, v/v) solution ( $1 \times 10^{-5}$  mol/L) at different aggregation time courses of 30 min (a) and 12 h (b, c), (c) is the magnified image at 12 h.

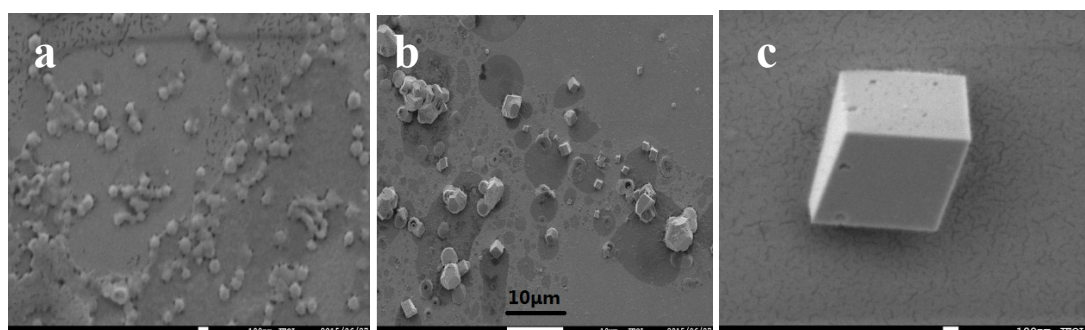

**Figure S2** SEM images of C5 aggregates in THF/H<sub>2</sub>O (60% water sample, v/v) mixed solution ( $1 \times 10^{-5}$  mol/L) at different aggregation time courses of 30 min (a) and 12 h (b, c), (c) is the magnified image at 12 h.

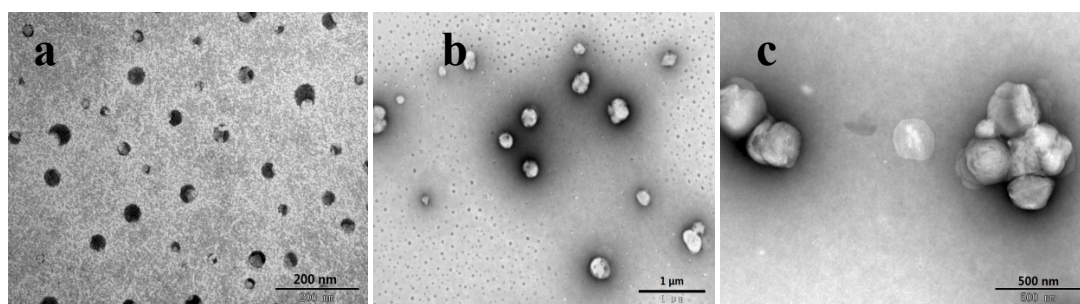

**Figure S3** TEM images of C3 aggregates in DMF/H<sub>2</sub>O (60% water sample, v/v) solution ( $1 \times 10^{-5}$  mol/L) at different aggregation time courses of 30 min (a) and 12 h (b, c), (c) is the magnified image at 12 h.

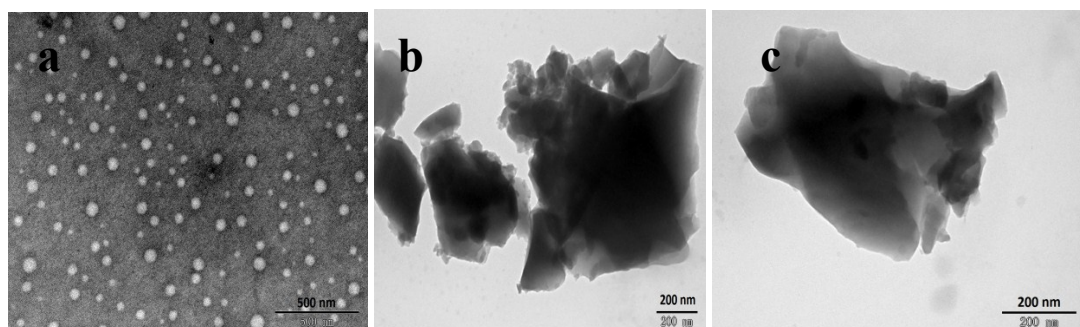

**Figure S4** TEM images of C5 aggregates in THF/H<sub>2</sub>O (60% water fraction, v/v) solution ( $1 \times 10^{-5}$  mol/L) at different aggregation time courses of 30 min (a) and 12 h (b, c), (c) is the magnified image at 12 h.

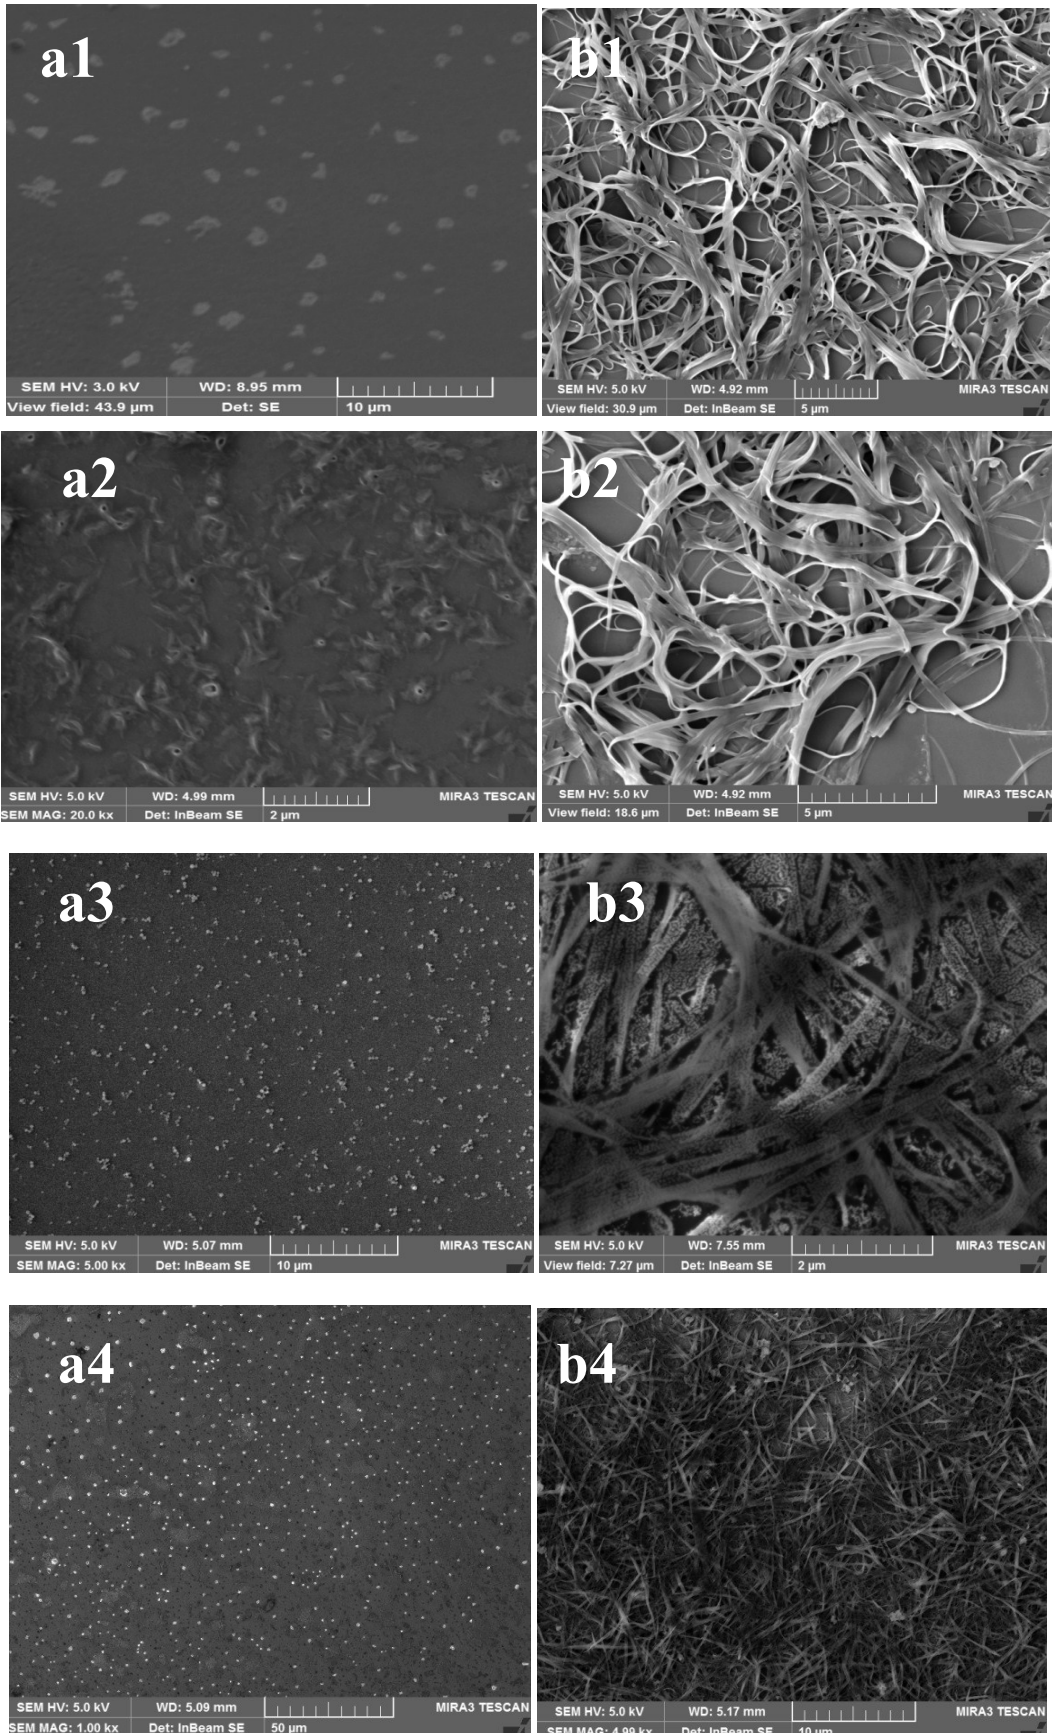

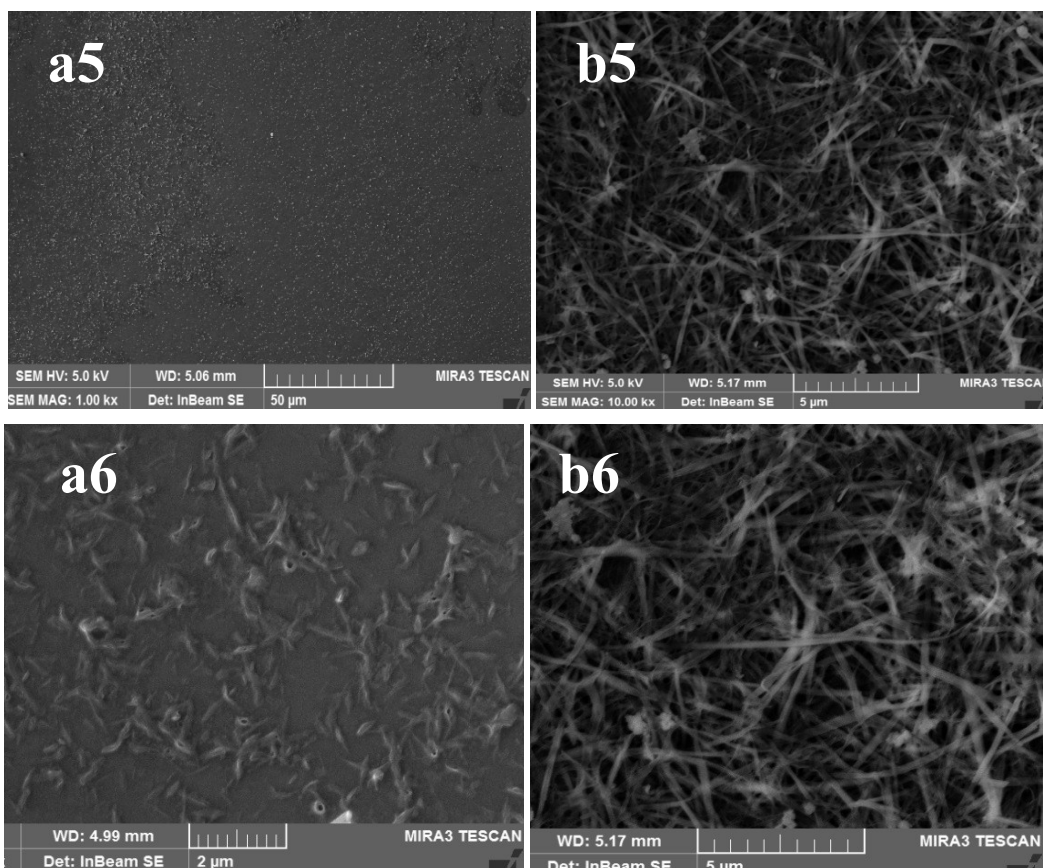

**Figure S5** SEM images of C11 (a1/b1), C12 (a2/b2), C13 (a3/b3), C14 (a4/b4), C15 (a5/b5) and C16 (a6/b6) in mixed DMF/H<sub>2</sub>O (40/60 (v/v)) solution ( $1 \times 10^{-5}$  mol/L), (a1-a4) at the aggregation time course of 30 min and (b1~b4) at aggregation time course of 12 h.

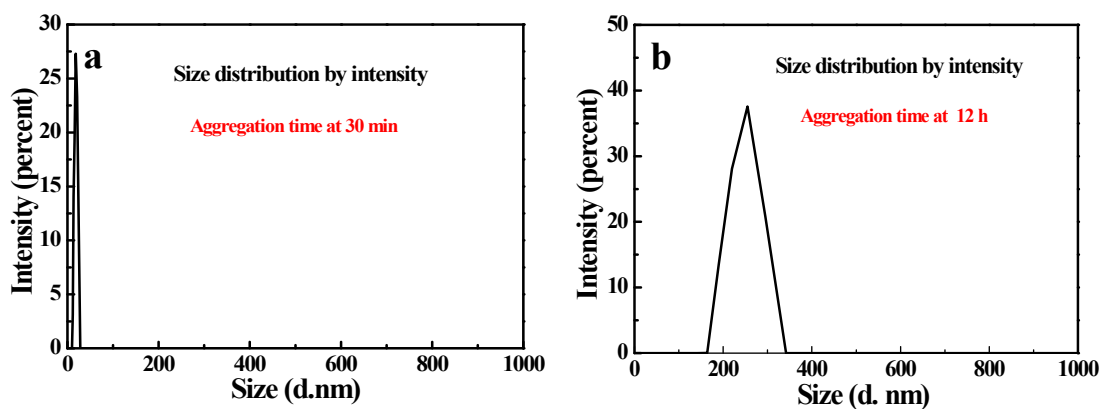

**Figure S6** Size distribution of C1 aggregates (at 30 min (a) and 12 h (b) respectively) in DMF/H<sub>2</sub>O (40/60 (v/v)) mixture solution ( $1 \times 10^{-5}$  mol/L) obtained by DLS.

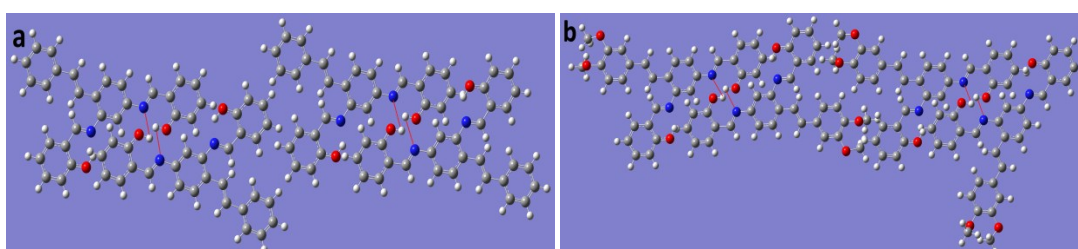



**Figure S7** Simulated stacking modes of **C1** (a) and **C3** (b) molecules utilizing the  $\pi$ - $\pi$  stacking interaction and intermolecular hydrogen bond interaction (O-H $\cdots$ N, red line).

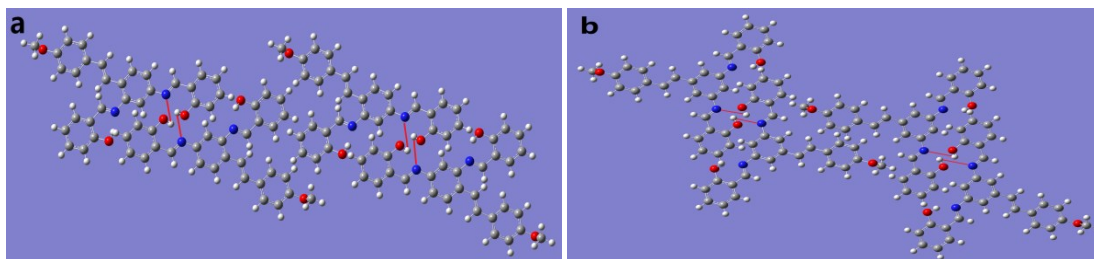

**Figure S8** Simulated stacking modes of **C2** (a) and **C5** (b) molecules utilizing the  $\pi$ - $\pi$  stacking interaction and intermolecular hydrogen bond interaction (O-H $\cdots$ N, red line).

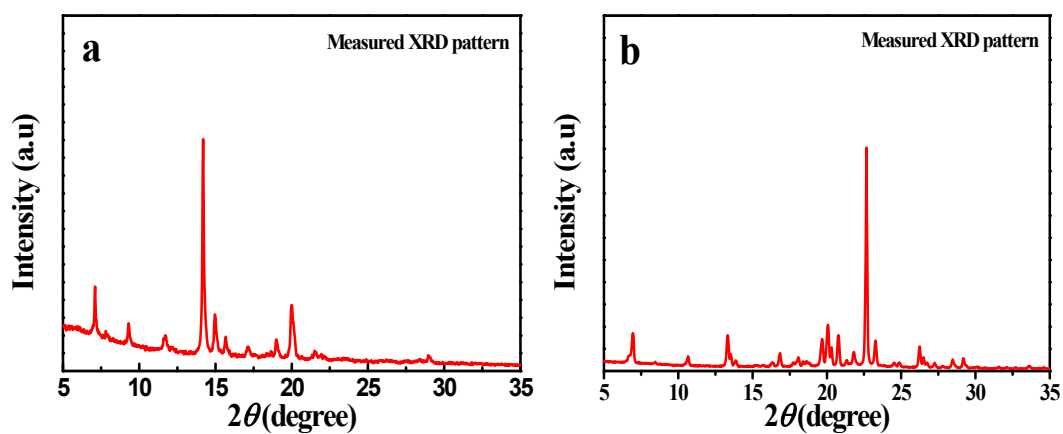

**Figure S9** Measured XRD pattern of powders of **C5** (a) and **C6** (b).

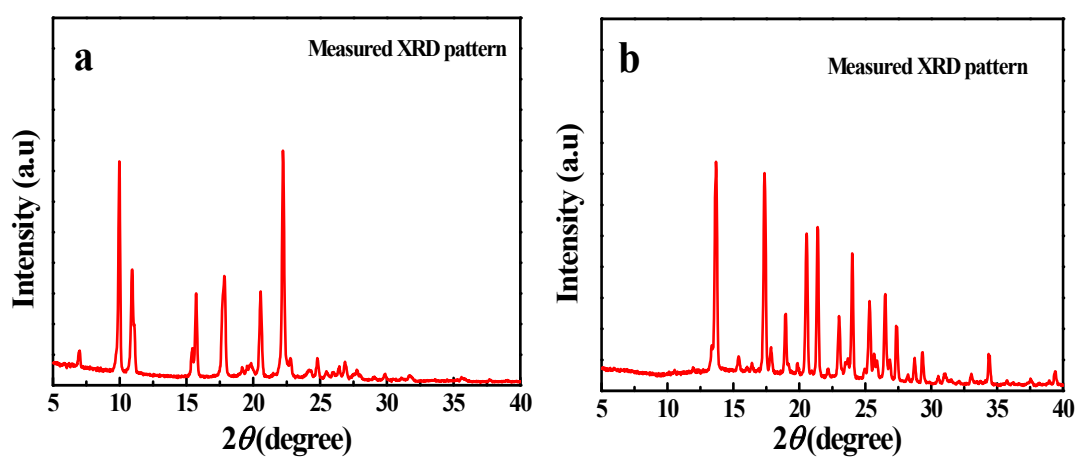

**Figure S10** Measured XRD pattern of powders of **C11** (a) and **C14** (b).

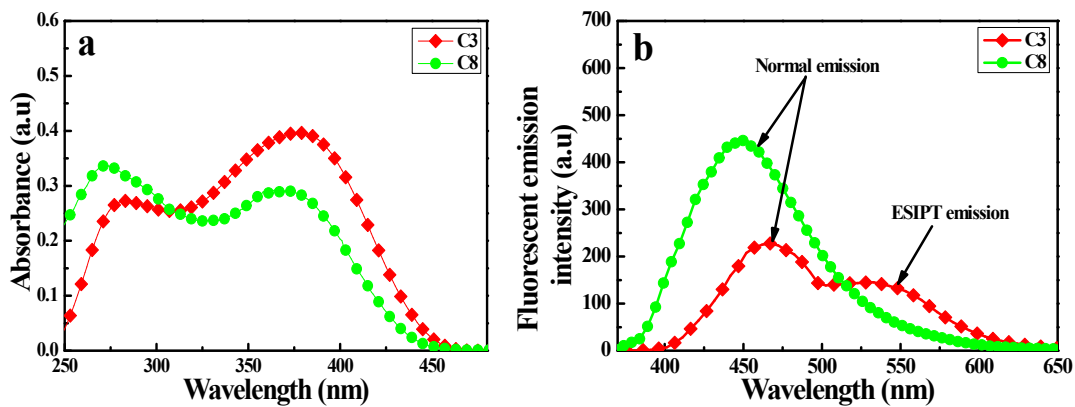

Figure S11 (a) UV absorption spectra and emission spectra of C3 and C8 in DMF solution, Ex: 350 nm, C,  $1 \times 10^{-5}$  mol/L

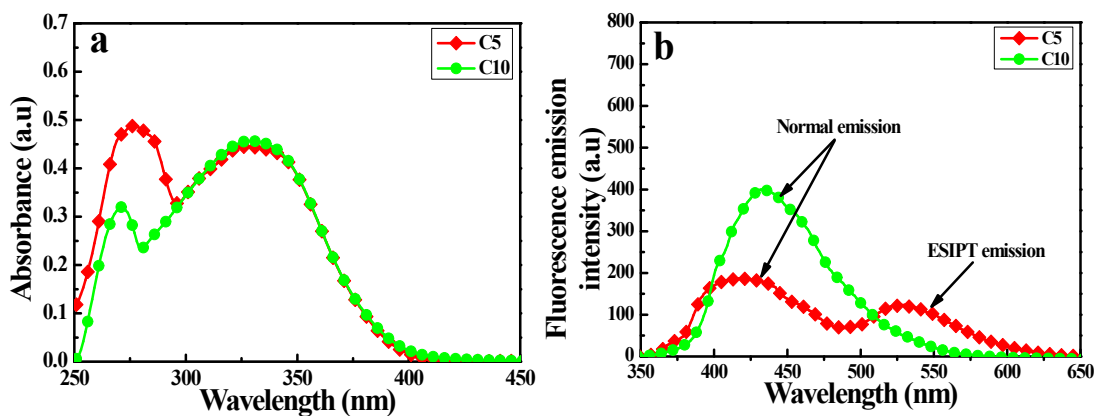

Figure S12 Emission spectra of C5 (a) and C10 (b) in THF solution, Ex: 350 nm, C,  $1 \times 10^{-5}$  mol/L

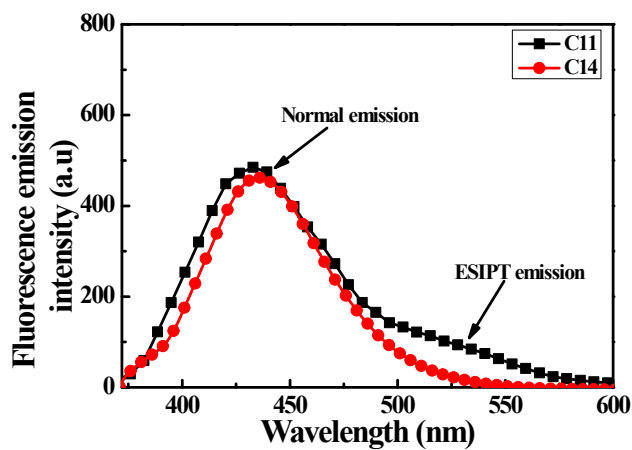

Figure S13 Emission spectra of C11 (a) and C14 (b) in DMF solution, Ex: 350 nm, C,  $1 \times 10^{-5}$  mol/L

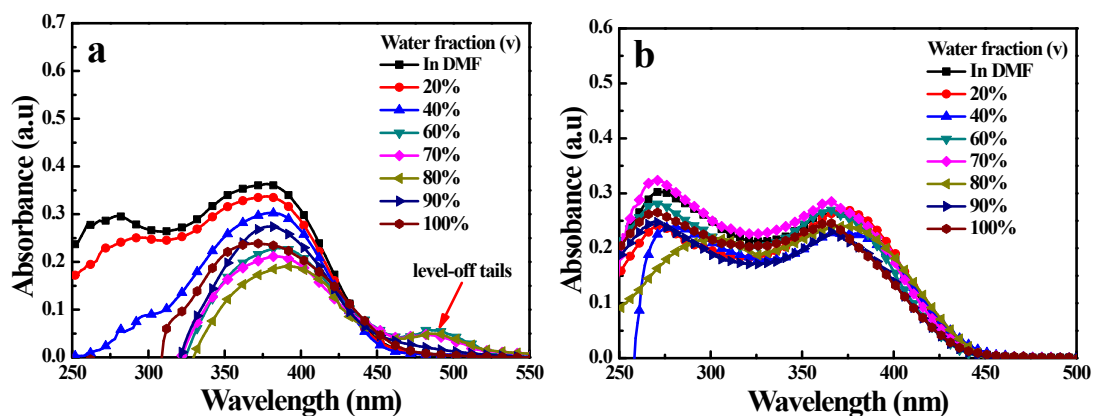

Figure S14 UV-vis absorption spectra of C3 (a) and C8 (b) in DMF/H<sub>2</sub>O mixed solution with different water volume fractions, C,  $1 \times 10^{-5}$  mol/L.

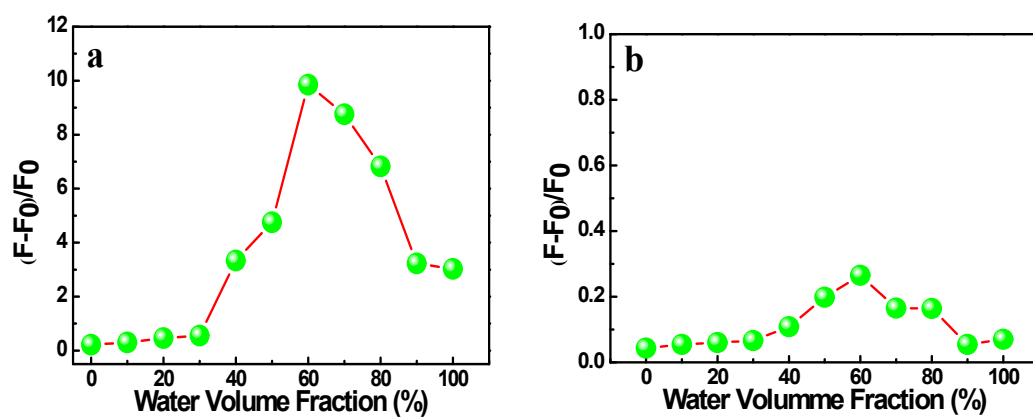

Figure S15 Effect of water volume fraction ( $f_w$ ) of C3 (a) and C8 (b) on the fluorescent intensity in mixed DMF/H<sub>2</sub>O solution at aggregation time course of 12 h, pH, 7.0, C,  $1 \times 10^{-5}$  mol/L.

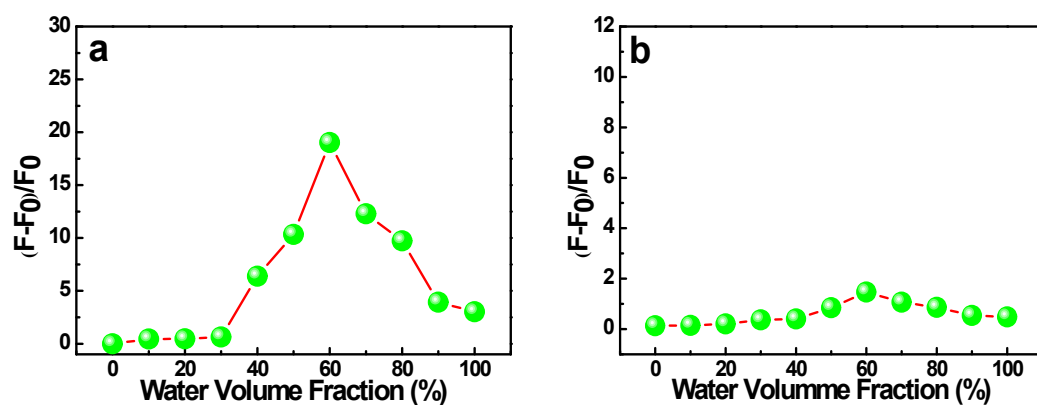

Figure S16 Effect of water volume fraction ( $f_w$ ) of C5 (a) and C10 (b) on fluorescent intensity in THF/H<sub>2</sub>O mixed solvents at the time course of 12 h, pH, 7.0, C,  $1 \times 10^{-5}$  mol/L.

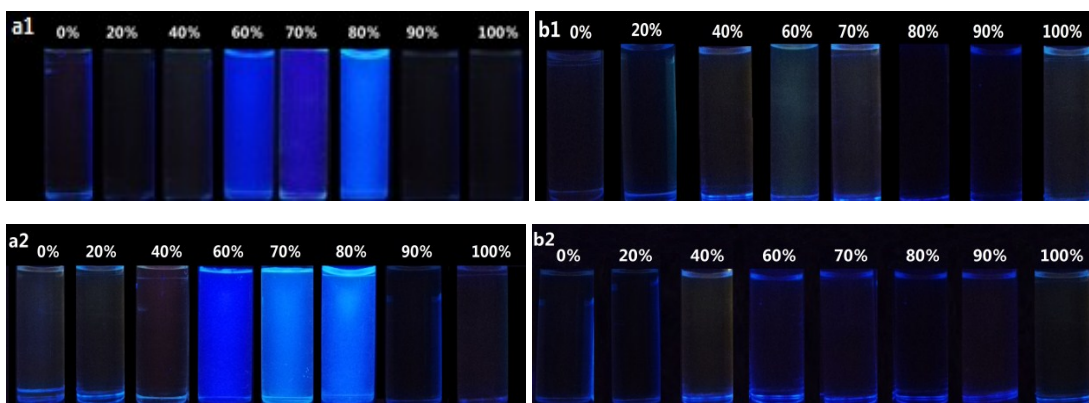

**Figure S17** Optical photographs recorded under 365 nm UV lamp irradiation of C1(a1), C6 (b1), C3 (a2) and C8 (b2) in DMF/H<sub>2</sub>O mixtures with various volume fractions of water at aggregation time of 12 h. C,  $1 \times 10^{-5}$  mol/L.

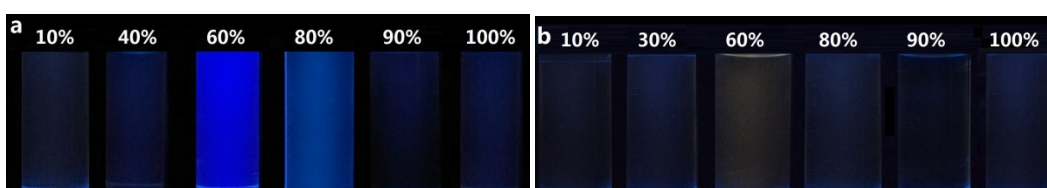

**Figure S18** Optical photographs recorded under 365 nm UV lamp irradiation of C5 (a) and C10 (b) in THF/H<sub>2</sub>O mixture solution with various volume fractions of water at aggregation time of 12 h. C,  $1 \times 10^{-5}$  mol/L.

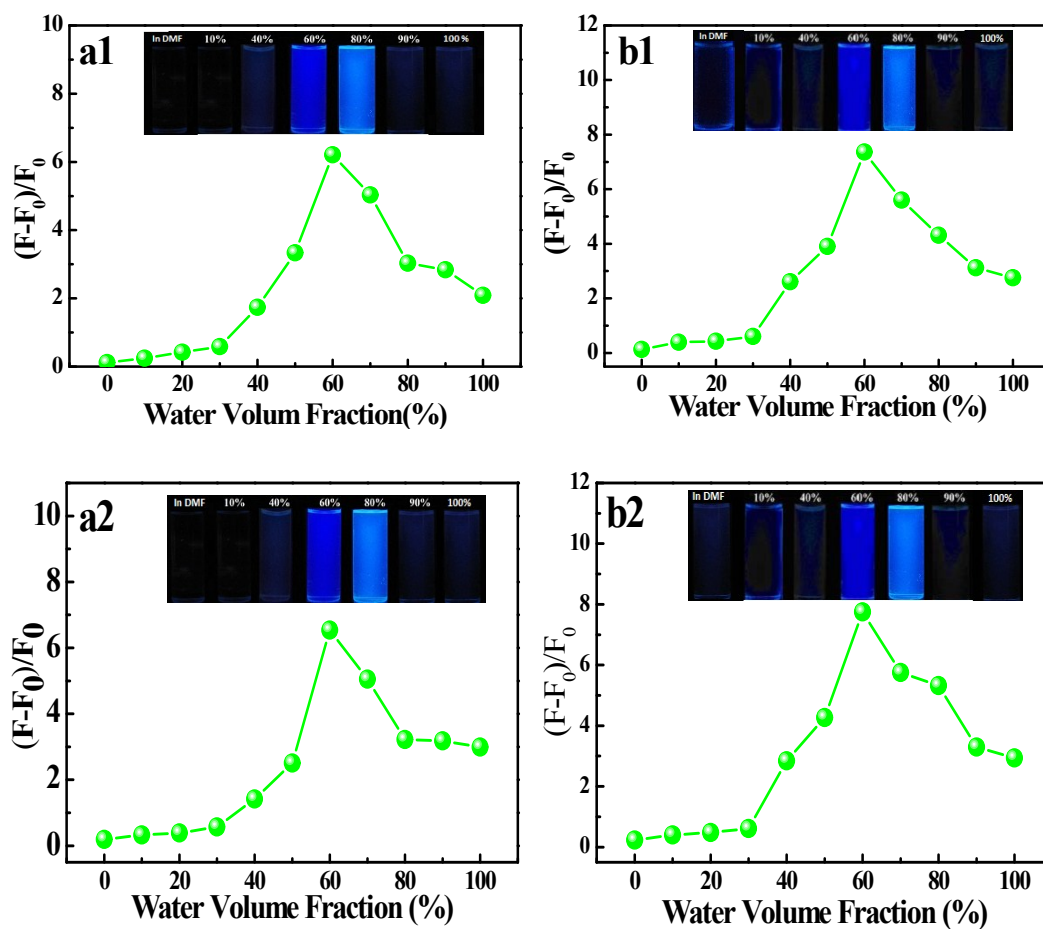



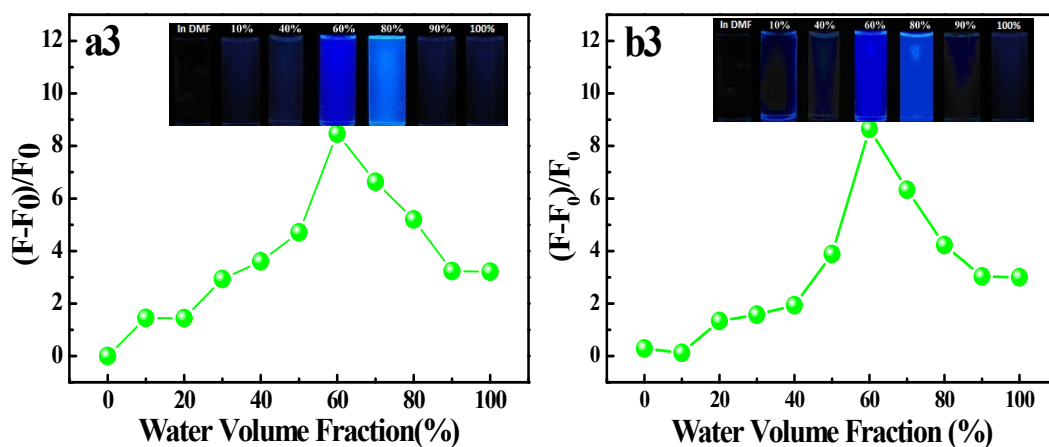

**Figure S19** (a1/a2/a3) Effect of water volume fractions ( $f_w$ ) of C11, C12, C13 and (b1/b2/b3) effect of water volume fractions ( $f_w$ ) of C14, C15, C16 on fluorescent intensity in mixed DMF/H<sub>2</sub>O solution at aggregation time course of 12 h, pH, 7.0, C,  $1 \times 10^{-5}$  mol/L respectively, the insert images in H<sub>2</sub>O fraction with DMF under 365 nm UV illumination.

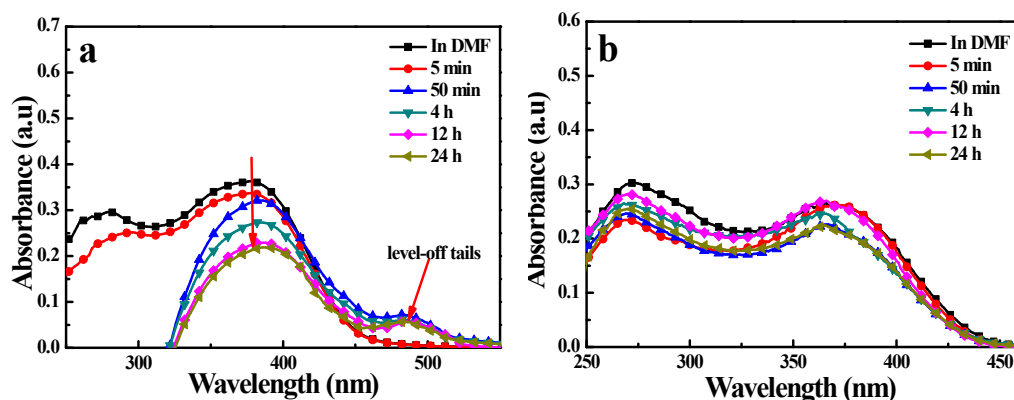

**Figure S20** Time-dependent evolution of UV-visible absorption spectra of C3 (a) and C8 (b) in mixed DMF/H<sub>2</sub>O solvent (DMF/H<sub>2</sub>O =40/60 (v/v)), C,  $1 \times 10^{-5}$  mol/L.

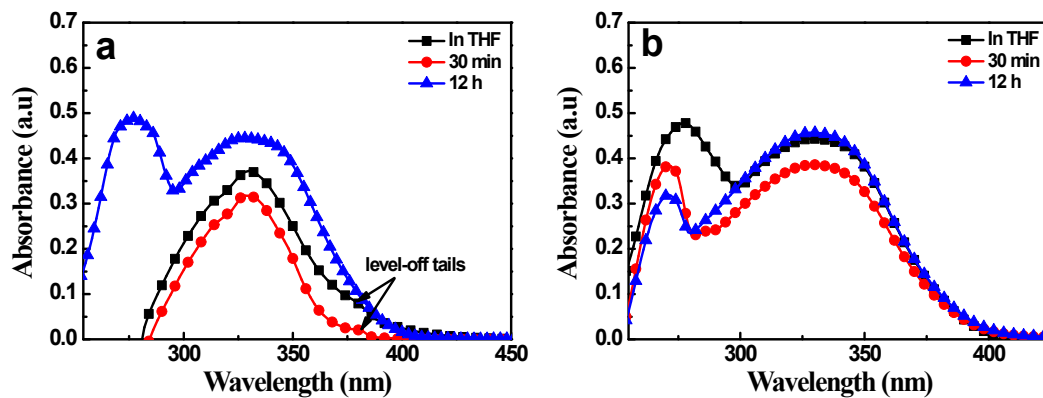

**Figure S21** Time-dependent absorption spectra of C5 (a) and C10 (b) in mixed THF/H<sub>2</sub>O solvent (60% water sample (v/v)), C,  $1 \times 10^{-5}$  mol/L respectively

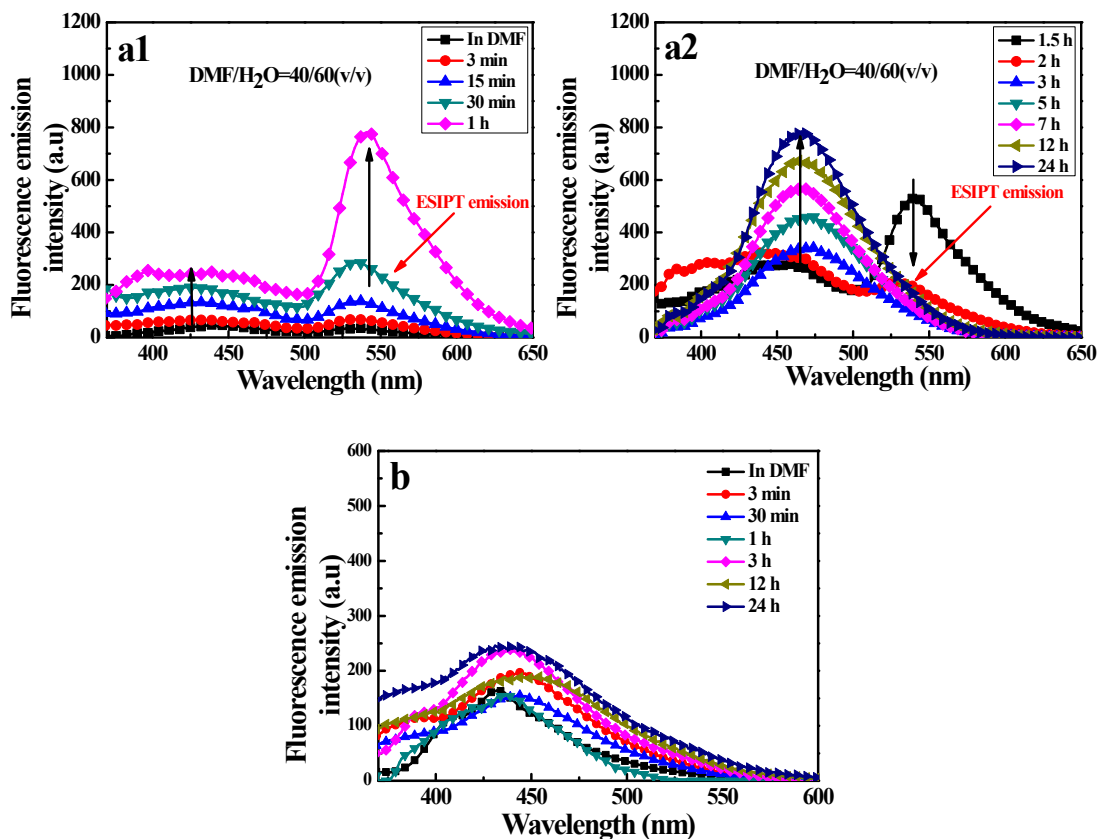

Figure S22 Time-dependent evolution of the emission spectra of C3 (a1/a2) and C8 (b) in mixed DMF/H<sub>2</sub>O (60% water fraction, v/v) solution, C,  $1 \times 10^{-5}$  mol/L, Ex: 350 nm.

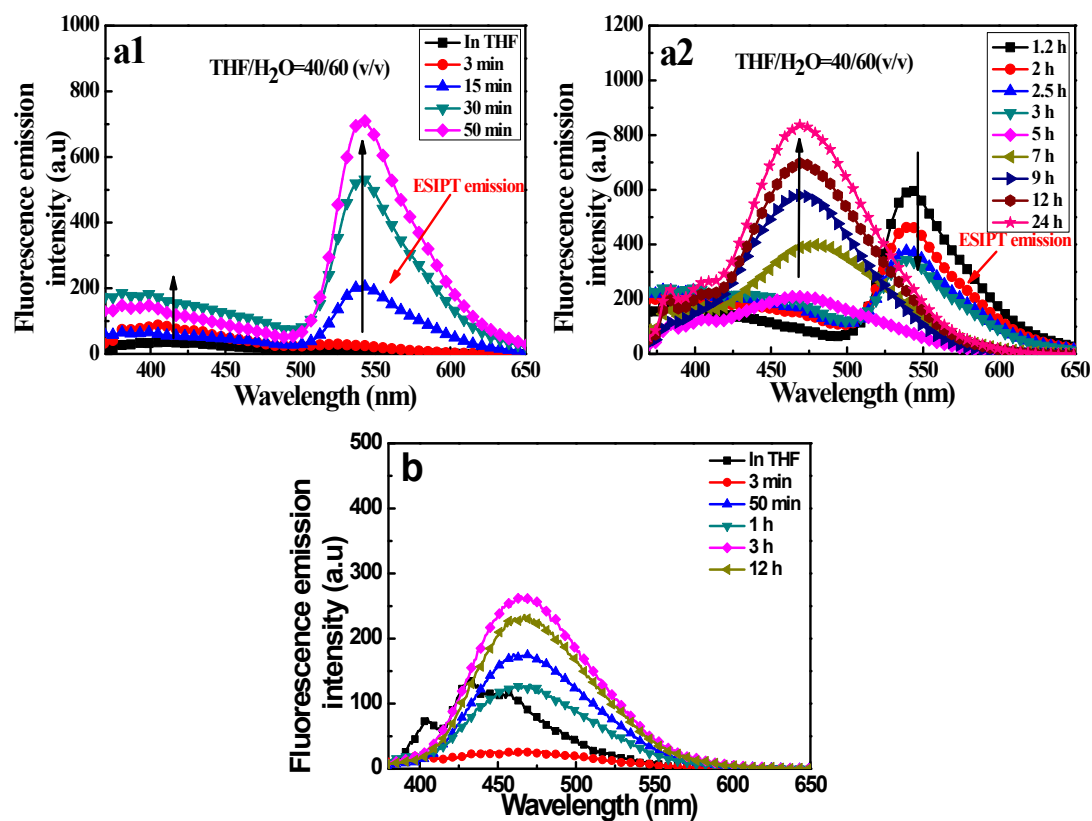

Figure S23 Time-dependent evolution of the emission spectra of C5 (a1/a2) and C10 (b) in mixed THF/H<sub>2</sub>O

(60% water fraction, v/v) solution, C,  $1 \times 10^{-5}$  mol/L, Ex: 350 nm.

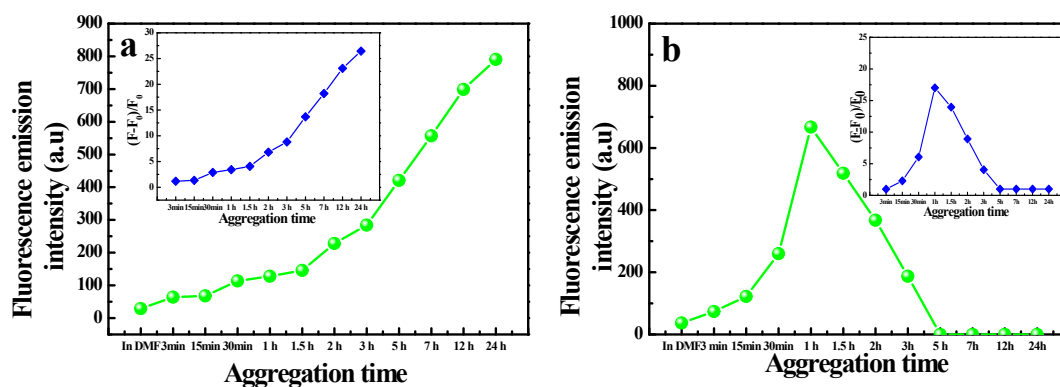

Figure S24 Plots of the fluorescence emission intensities of enol and keto tautomers of the target branched dyes

C1 (peaked at 470 nm (a) and 535 nm (b) respectively) to different aggregation time.

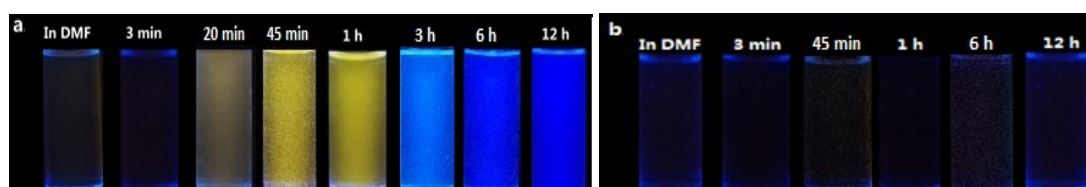

Figure S25 Images under different aggregation time intervals of C3 (a) and C8 (b) under UV lamp at 365 nm in

DMF/H<sub>2</sub>O mixture (60% water fraction (v)), C,  $1 \times 10^{-5}$  mol/L.

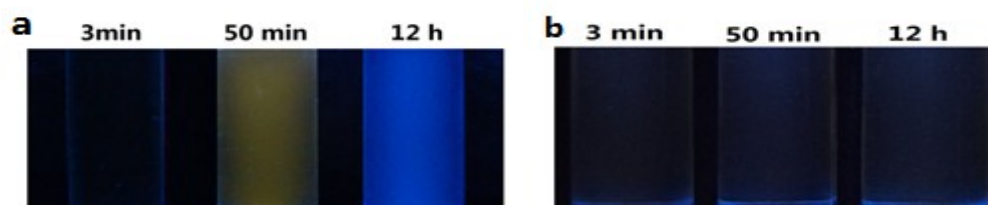

Figure S26 The images under different aggregation time intervals of C5 (a) and C10 (b) under UV lamp at 365

nm in THF/H<sub>2</sub>O mixture (60% water fraction (v)), C,  $1 \times 10^{-5}$  mol/L.

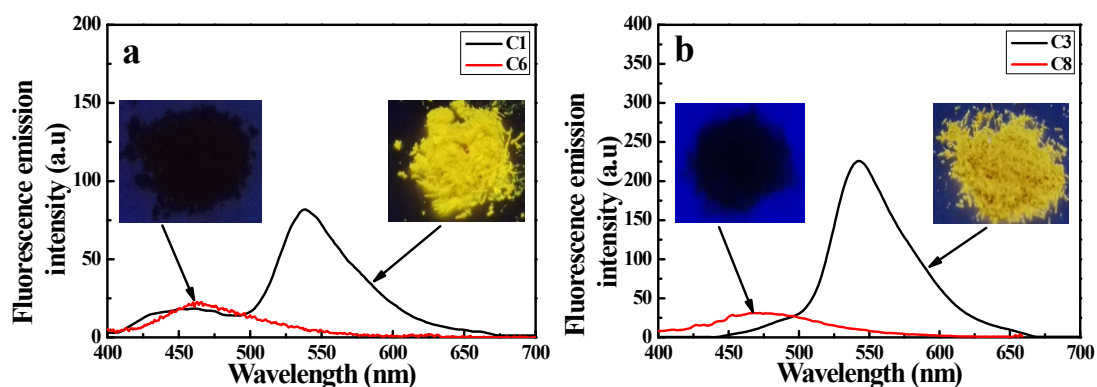

Figure S27 Emission spectra of C1/C6 (a) and emission spectra of C3/C8 (b) in solid state, Ex: 350 nm, the insert

images are solid state of C1/C6 and C3/C8 under 365 nm UV lamp respectively.

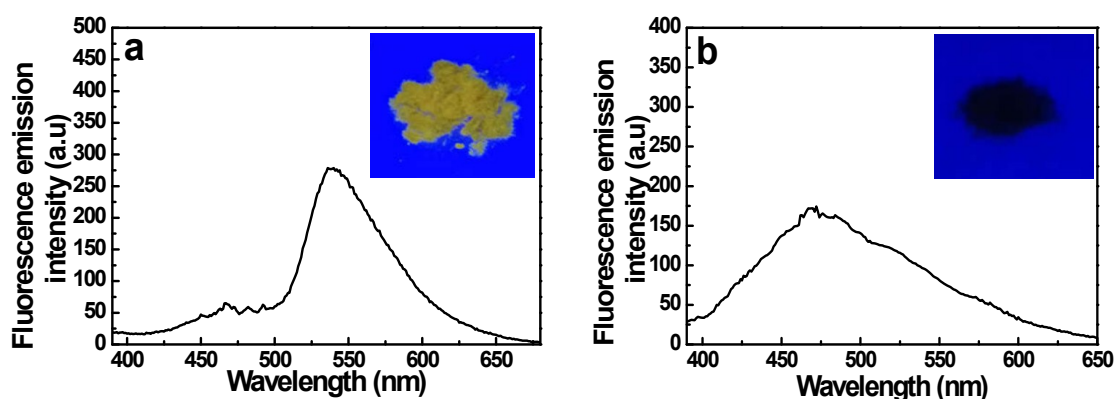

Figure S28 Emission spectra of C5 (a) and C10 (b) in solid state, EX: 350 nm, the images are solid state C5 and C10 under 365 nm UV lamp respectively.

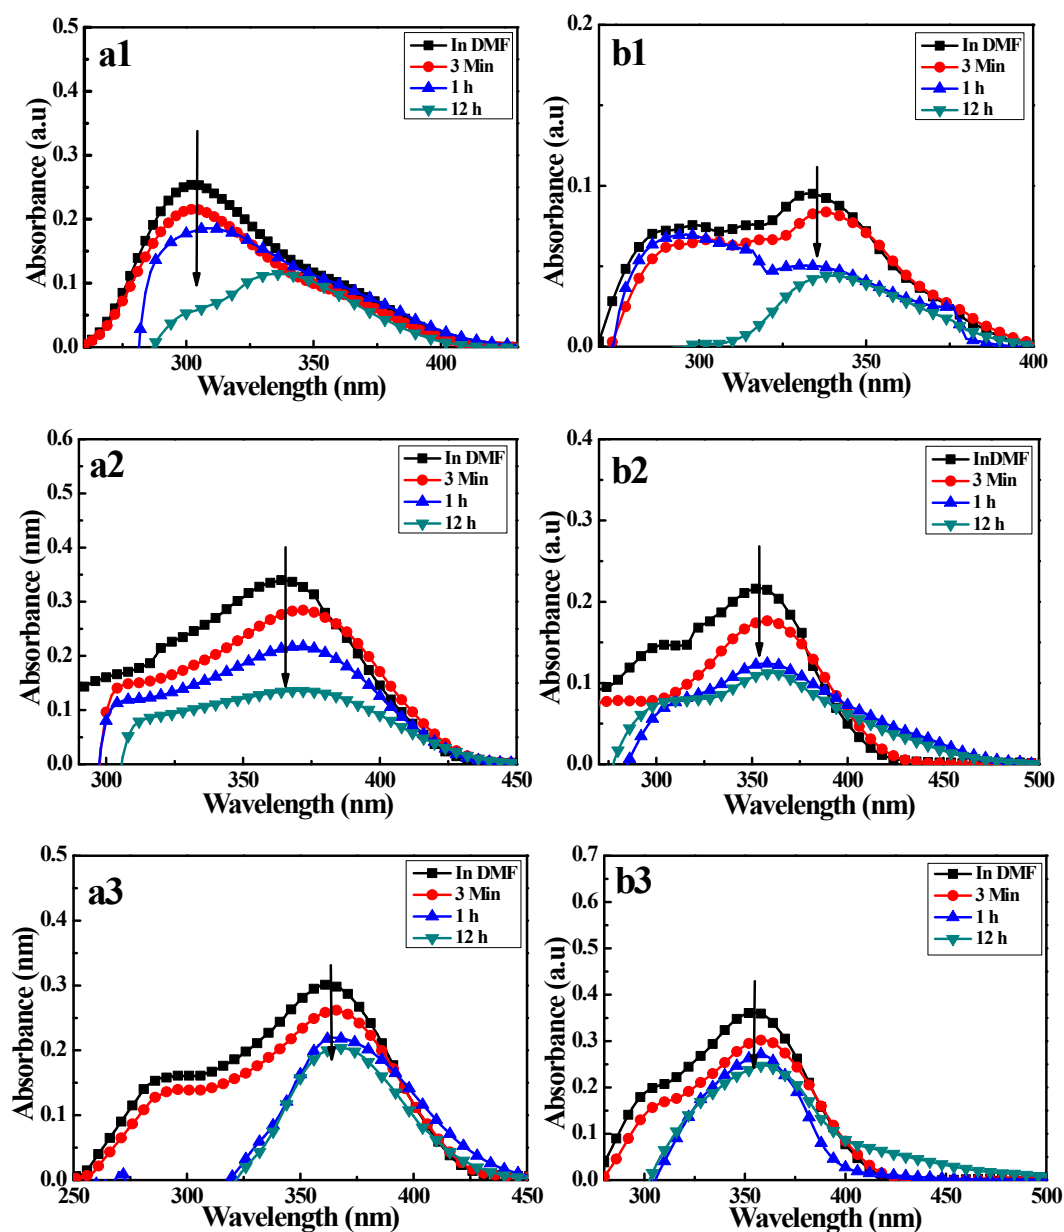

**Figure S29** (a1/a2/a3) Time-dependent evolution of UV-visible absorption spectra of **C11**, **C12**, **C13** and (b1/b2/b3) time-dependent evolution of UV-visible absorption spectra of **C14**, **C15**, **C16** in mixed DMF/H<sub>2</sub>O solvent (DMF/H<sub>2</sub>O =40/60 (v/v)), C, 1×10<sup>-5</sup> mol/L.

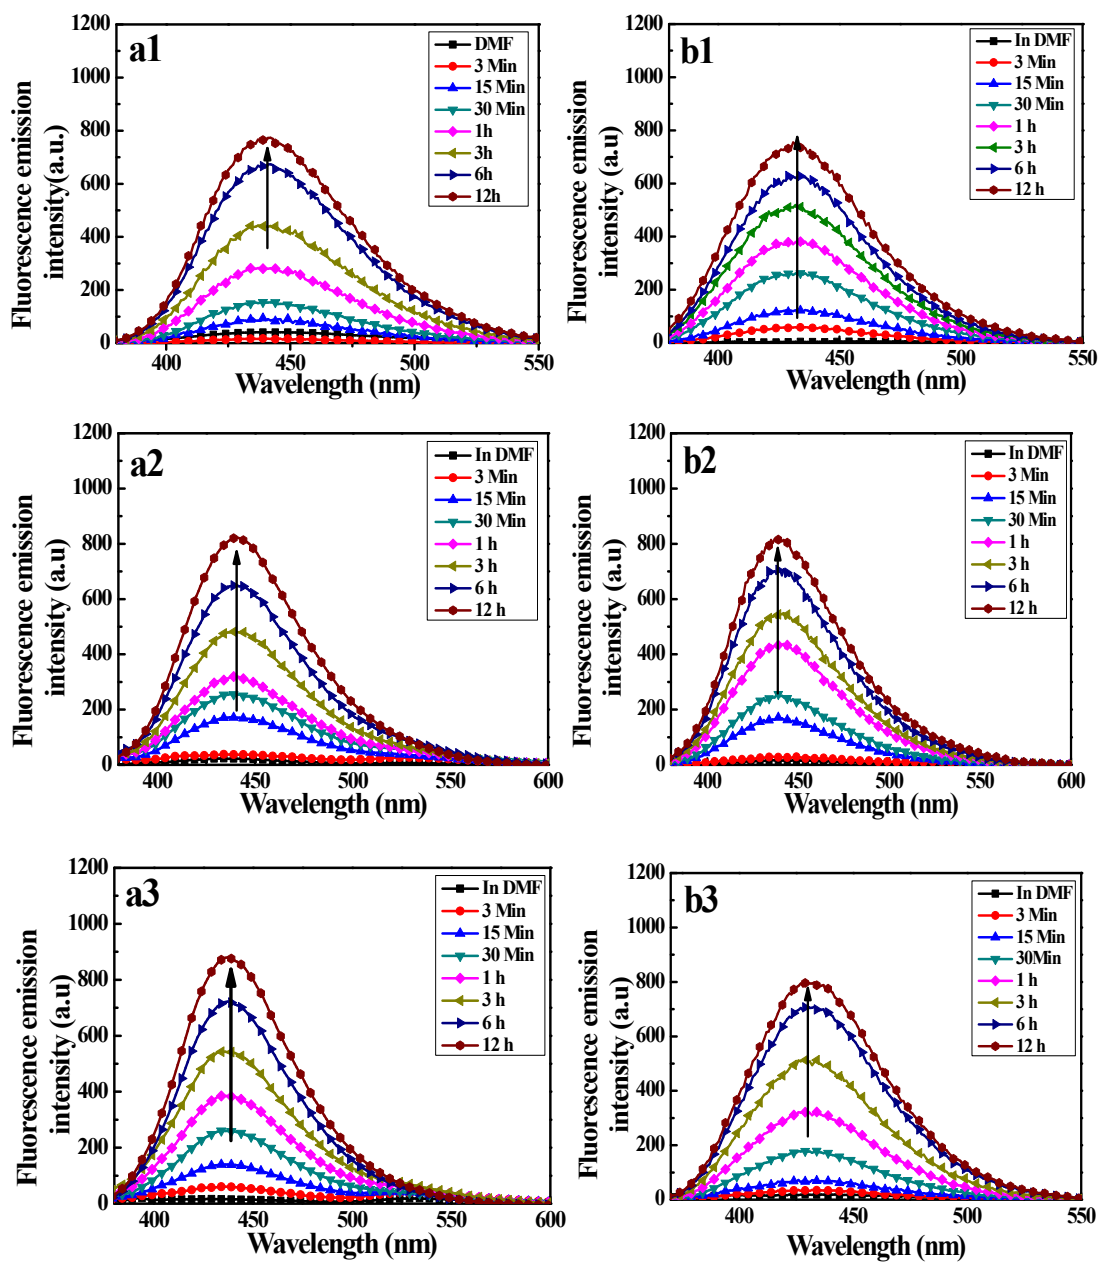

**Figure S30** (a1/a2/a3) Time-dependent evolution of fluorescence spectra of **C11**, **C12**, **C13** and (b1/b2/b3) time-dependent evolution of the fluorescence spectra of **C14**, **C15**, **C16** in mixed DMF/H<sub>2</sub>O solvent (DMF/H<sub>2</sub>O =40/60 (v/v)), C, 1×10<sup>-5</sup> mol/L, Ex: 350 nm.

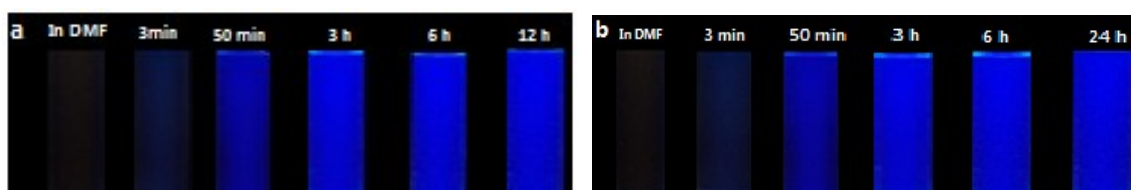



**Figure S31** Images under different aggregation time internals of linear dyes **C11** (a) and linear reference **C14** (b) under 365 nm UV lamp in DMF/H<sub>2</sub>O mixture (60% water volume fraction), C, 1×10<sup>-5</sup> mol/L

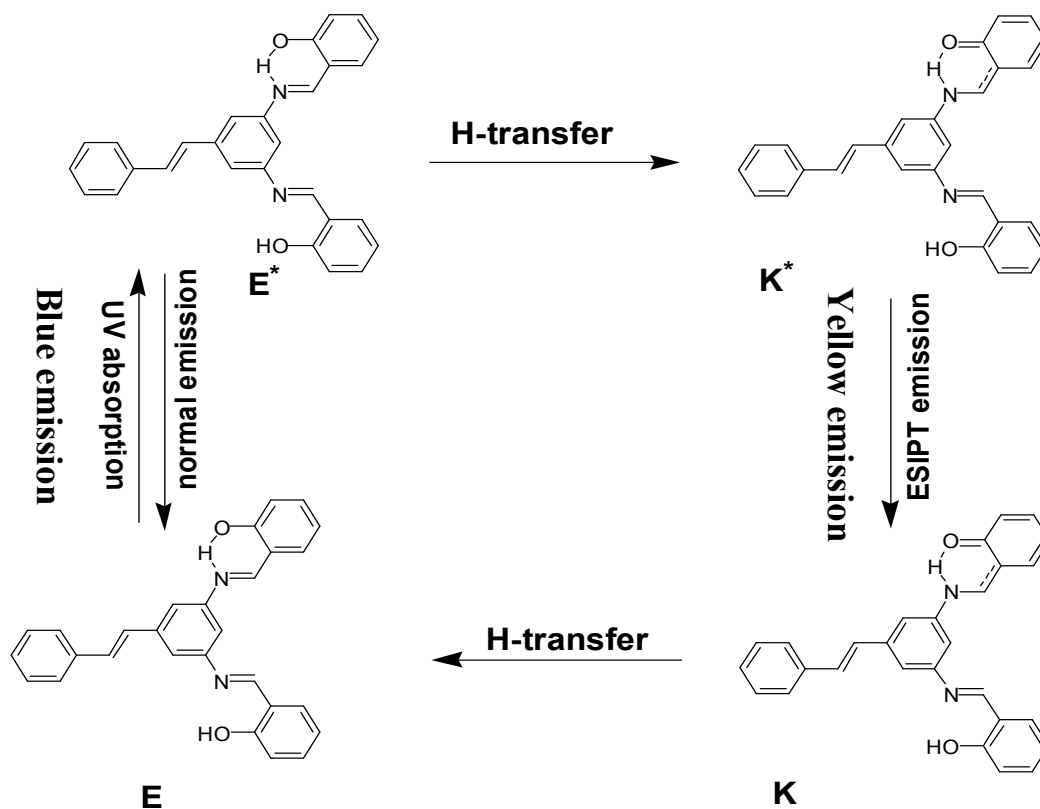

**Scheme S1** A typical four-level cycle of enol-keto phototautomerization during internal proton transfer in the excited state of **C4**

## 2. X-ray single crystal diffraction data of target C1

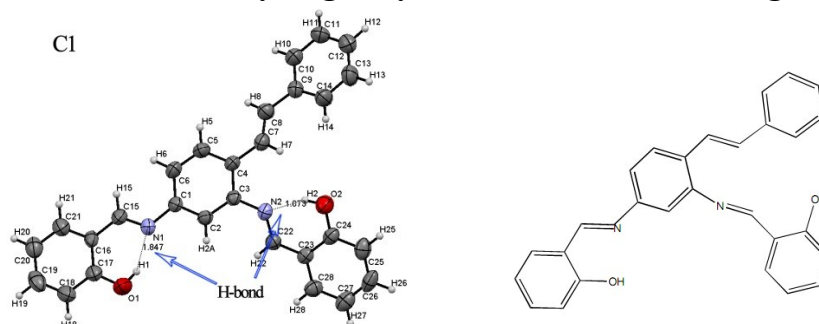

Table S1 Atomic coordinates of compound C1

| Number | Label | Charge | SybylType | Xfrac + ESD | Yfrac + ESD | Zfrac + ESD | Symm. op. |
|--------|-------|--------|-----------|-------------|-------------|-------------|-----------|
| 1      | N1    | 0      | N.2       | 1.4625(7)   | 0.46275(11) | 0.6672(3)   | x,y,z     |
| 2      | N2    | 0      | N.2       | 0.7605(6)   | 0.38220(9)  | 0.5350(3)   | x,y,z     |
| 3      | O1    | 0      | O.3       | 1.6120(7)   | 0.51227(11) | 0.5211(3)   | x,y,z     |
| 4      | H1    | 0      | H         | 1.5221      | 0.4962      | 0.5464      | x,y,z     |
| 5      | O2    | 0      | O.3       | 0.3509(6)   | 0.34877(9)  | 0.4657(3)   | x,y,z     |
| 6      | H2    | 0      | H         | 0.454       | 0.3606      | 0.5107      | x,y,z     |
| 7      | C1    | 0      | C.2       | 1.2954(8)   | 0.43346(12) | 0.6948(3)   | x,y,z     |
| 8      | C2    | 0      | C.2       | 1.1156(7)   | 0.42284(12) | 0.6081(3)   | x,y,z     |
| 9      | H2A   | 0      | H         | 1.1076      | 0.4351      | 0.5351      | x,y,z     |
| 10     | C3    | 0      | C.2       | 0.9446(7)   | 0.39432(12) | 0.6255(3)   | x,y,z     |
| 11     | C4    | 0      | C.2       | 0.9514(8)   | 0.37568(12) | 0.7359(3)   | x,y,z     |
| 12     | C5    | 0      | C.2       | 1.1363(9)   | 0.38742(14) | 0.8232(3)   | x,y,z     |
| 13     | H5    | 0      | H         | 1.1453      | 0.3756      | 0.8969      | x,y,z     |
| 14     | C6    | 0      | C.2       | 1.3037(8)   | 0.41540(14) | 0.8052(4)   | x,y,z     |
| 15     | H6    | 0      | H         | 1.4229      | 0.4225      | 0.8658      | x,y,z     |
| 16     | C7    | 0      | C.2       | 0.7776(8)   | 0.34495(14) | 0.7565(3)   | x,y,z     |
| 17     | H7    | 0      | H         | 0.6414      | 0.3432      | 0.7014      | x,y,z     |
| 18     | C8    | 0      | C.2       | 0.7953(8)   | 0.31958(14) | 0.8452(4)   | x,y,z     |
| 19     | H8    | 0      | H         | 0.9327      | 0.3213      | 0.8994      | x,y,z     |
| 20     | C9    | 0      | C.2       | 0.6198(8)   | 0.28851(13) | 0.8684(4)   | x,y,z     |
| 21     | C10   | 0      | C.2       | 0.6704(9)   | 0.26526(14) | 0.9709(4)   | x,y,z     |
| 22     | H10   | 0      | H         | 0.8136      | 0.2689      | 1.02        | x,y,z     |
| 23     | C11   | 0      | C.2       | 0.5109(10)  | 0.23715(15) | 0.9997(4)   | x,y,z     |
| 24     | H11   | 0      | H         | 0.5468      | 0.222       | 1.0682      | x,y,z     |
| 25     | C12   | 0      | C.2       | 0.3046(10)  | 0.23138(15) | 0.9304(4)   | x,y,z     |
| 26     | H12   | 0      | H         | 0.1969      | 0.2125      | 0.9513      | x,y,z     |

|    |     |   |     |            |             |           |       |
|----|-----|---|-----|------------|-------------|-----------|-------|
| 27 | C13 | 0 | C.2 | 0.2512(10) | 0.25319(17) | 0.8288(4) | x,y,z |
| 28 | H13 | 0 | H   | 0.1085     | 0.2488      | 0.78      | x,y,z |
| 29 | C14 | 0 | C.2 | 0.4089(9)  | 0.28157(16) | 0.7991(4) | x,y,z |
| 30 | H14 | 0 | H   | 0.3708     | 0.2964      | 0.7301    | x,y,z |
| 31 | C15 | 0 | C.2 | 1.6361(9)  | 0.47453(13) | 0.7421(4) | x,y,z |
| 32 | H15 | 0 | H   | 1.6535     | 0.4635      | 0.817     | x,y,z |
| 33 | C16 | 0 | C.2 | 1.8053(8)  | 0.50400(13) | 0.7164(3) | x,y,z |
| 34 | C17 | 0 | C.2 | 1.7919(9)  | 0.52143(14) | 0.6060(4) | x,y,z |
| 35 | C18 | 0 | C.2 | 1.9675(10) | 0.54830(15) | 0.5837(4) | x,y,z |
| 36 | H18 | 0 | H   | 1.9586     | 0.5599      | 0.5098    | x,y,z |
| 37 | C19 | 0 | C.2 | 2.1525(10) | 0.55801(15) | 0.6680(5) | x,y,z |
| 38 | H19 | 0 | H   | 2.2684     | 0.576       | 0.6512    | x,y,z |
| 39 | C20 | 0 | C.2 | 2.1683(10) | 0.54125(15) | 0.7776(5) | x,y,z |
| 40 | H20 | 0 | H   | 2.2936     | 0.5478      | 0.8358    | x,y,z |
| 41 | C21 | 0 | C.2 | 1.9953(9)  | 0.51477(14) | 0.7992(4) | x,y,z |
| 42 | H21 | 0 | H   | 2.0061     | 0.5034      | 0.8735    | x,y,z |
| 43 | C22 | 0 | C.2 | 0.7918(8)  | 0.38280(12) | 0.4277(3) | x,y,z |
| 44 | H22 | 0 | H   | 0.9328     | 0.3931      | 0.4095    | x,y,z |
| 45 | C23 | 0 | C.2 | 0.6166(7)  | 0.36805(12) | 0.3351(3) | x,y,z |
| 46 | C24 | 0 | C.2 | 0.4073(8)  | 0.34928(13) | 0.3571(3) | x,y,z |
| 47 | C25 | 0 | C.2 | 0.2580(8)  | 0.33096(14) | 0.2685(4) | x,y,z |
| 48 | H25 | 0 | H   | 0.1203     | 0.3184      | 0.2835    | x,y,z |
| 49 | C26 | 0 | C.2 | 0.3120(10) | 0.33121(14) | 0.1570(4) | x,y,z |
| 50 | H26 | 0 | H   | 0.2106     | 0.3184      | 0.0973    | x,y,z |
| 51 | C27 | 0 | C.2 | 0.5132(10) | 0.35009(16) | 0.1317(4) | x,y,z |
| 52 | H27 | 0 | H   | 0.5467     | 0.3505      | 0.0557    | x,y,z |
| 53 | C28 | 0 | C.2 | 0.6623(8)  | 0.36817(14) | 0.2206(4) | x,y,z |
| 54 | H28 | 0 | H   | 0.7984     | 0.3809      | 0.2041    | x,y,z |

**Table S2** Bond lengths of compound **C1** (Å)

| Number | Atom1 | Atom2 | Type    | Polymeric | Length   | SybylType |
|--------|-------|-------|---------|-----------|----------|-----------|
| 1      | N1    | C1    | Unknown | No        | 1.423(6) | un        |
| 2      | N1    | C15   | Unknown | No        | 1.273(6) | un        |
| 3      | N2    | C3    | Unknown | No        | 1.423(5) | un        |
| 4      | N2    | C22   | Unknown | No        | 1.284(5) | un        |
| 5      | O1    | H1    | Unknown | No        | 0.820(4) | 1         |
| 6      | O1    | C17   | Unknown | No        | 1.343(6) | 1         |
| 7      | O2    | H2    | Unknown | No        | 0.821(3) | 1         |
| 8      | O2    | C24   | Unknown | No        | 1.347(5) | 1         |
| 9      | C1    | C2    | Unknown | No        | 1.367(5) | un        |
| 10     | C1    | C6    | Unknown | No        | 1.402(6) | un        |
| 11     | C2    | H2A   | Unknown | No        | 0.930(4) | 1         |
| 12     | C2    | C3    | Unknown | No        | 1.388(6) | un        |
| 13     | C3    | C4    | Unknown | No        | 1.411(5) | un        |

---

|    |     |     |         |    |          |    |
|----|-----|-----|---------|----|----------|----|
| 14 | C4  | C5  | Unknown | No | 1.400(6) | un |
| 15 | C4  | C7  | Unknown | No | 1.458(6) | un |
| 16 | C5  | H5  | Unknown | No | 0.931(4) | 1  |
| 17 | C5  | C6  | Unknown | No | 1.363(7) | un |
| 18 | C6  | H6  | Unknown | No | 0.929(4) | 1  |
| 19 | C7  | H7  | Unknown | No | 0.930(4) | 1  |
| 20 | C7  | C8  | Unknown | No | 1.310(6) | un |
| 21 | C8  | H8  | Unknown | No | 0.929(4) | 1  |
| 22 | C8  | C9  | Unknown | No | 1.481(7) | un |
| 23 | C9  | C10 | Unknown | No | 1.400(6) | un |
| 24 | C9  | C14 | Unknown | No | 1.362(6) | un |
| 25 | C10 | H10 | Unknown | No | 0.931(5) | 1  |
| 26 | C10 | C11 | Unknown | No | 1.372(7) | un |
| 27 | C11 | H11 | Unknown | No | 0.930(5) | 1  |
| 28 | C11 | C12 | Unknown | No | 1.335(7) | un |
| 29 | C12 | H12 | Unknown | No | 0.930(5) | 1  |
| 30 | C12 | C13 | Unknown | No | 1.368(7) | un |
| 31 | C13 | H13 | Unknown | No | 0.930(5) | 1  |
| 32 | C13 | C14 | Unknown | No | 1.374(8) | un |
| 33 | C14 | H14 | Unknown | No | 0.930(5) | 1  |
| 34 | C15 | H15 | Unknown | No | 0.930(5) | 1  |
| 35 | C15 | C16 | Unknown | No | 1.429(7) | un |
| 36 | C16 | C17 | Unknown | No | 1.390(6) | un |
| 37 | C16 | C21 | Unknown | No | 1.380(6) | un |
| 38 | C17 | C18 | Unknown | No | 1.388(7) | un |
| 39 | C18 | H18 | Unknown | No | 0.930(5) | 1  |
| 40 | C18 | C19 | Unknown | No | 1.362(7) | un |
| 41 | C19 | H19 | Unknown | No | 0.929(6) | 1  |
| 42 | C19 | C20 | Unknown | No | 1.372(8) | un |
| 43 | C20 | H20 | Unknown | No | 0.930(5) | 1  |
| 44 | C20 | C21 | Unknown | No | 1.367(8) | un |
| 45 | C21 | H21 | Unknown | No | 0.930(5) | 1  |
| 46 | C22 | H22 | Unknown | No | 0.930(5) | 1  |
| 47 | C22 | C23 | Unknown | No | 1.433(5) | un |
| 48 | C23 | C24 | Unknown | No | 1.405(6) | un |
| 49 | C23 | C28 | Unknown | No | 1.392(6) | un |
| 50 | C24 | C25 | Unknown | No | 1.367(6) | un |
| 51 | C25 | H25 | Unknown | No | 0.930(5) | 1  |
| 52 | C25 | C26 | Unknown | No | 1.375(7) | un |
| 53 | C26 | H26 | Unknown | No | 0.930(5) | 1  |
| 54 | C26 | C27 | Unknown | No | 1.379(8) | un |
| 55 | C27 | H27 | Unknown | No | 0.930(5) | 1  |
| 56 | C27 | C28 | Unknown | No | 1.365(6) | un |
| 57 | C28 | H28 | Unknown | No | 0.930(5) | 1  |

---

**Table S3** Bond angles of compound **C1** (°)

| Number | Atom1 | Atom2 | Atom3 | Angle    | Number | Atom1 | Atom2 | Atom3 | Angle    |
|--------|-------|-------|-------|----------|--------|-------|-------|-------|----------|
| 1      | C1    | N1    | C15   | 122.1(4) | 45     | C9    | C14   | H14   | 119.2(5) |
| 2      | C3    | N2    | C22   | 120.6(3) | 46     | C13   | C14   | H14   | 119.3(5) |
| 3      | H1    | O1    | C17   | 109.5(4) | 47     | N1    | C15   | H15   | 118.6(5) |
| 4      | H2    | O2    | C24   | 109.5(4) | 48     | N1    | C15   | C16   | 123.0(4) |
| 5      | N1    | C1    | C2    | 117.5(4) | 49     | H15   | C15   | C16   | 118.5(4) |
| 6      | N1    | C1    | C6    | 123.9(4) | 50     | C15   | C16   | C17   | 121.6(4) |
| 7      | C2    | C1    | C6    | 118.6(4) | 51     | C15   | C16   | C21   | 120.9(4) |
| 8      | C1    | C2    | H2A   | 119.0(4) | 52     | C17   | C16   | C21   | 117.4(4) |
| 9      | C1    | C2    | C3    | 122.1(4) | 53     | O1    | C17   | C16   | 120.6(4) |
| 10     | H2A   | C2    | C3    | 118.9(4) | 54     | O1    | C17   | C18   | 120.0(4) |
| 11     | N2    | C3    | C2    | 122.6(3) | 55     | C16   | C17   | C18   | 119.4(4) |
| 12     | N2    | C3    | C4    | 117.5(3) | 56     | C17   | C18   | H18   | 119.4(5) |
| 13     | C2    | C3    | C4    | 120.0(4) | 57     | C17   | C18   | C19   | 121.3(5) |
| 14     | C3    | C4    | C5    | 116.6(4) | 58     | H18   | C18   | C19   | 119.4(5) |
| 15     | C3    | C4    | C7    | 121.4(4) | 59     | C18   | C19   | H19   | 119.9(5) |
| 16     | C5    | C4    | C7    | 122.0(4) | 60     | C18   | C19   | C20   | 120.2(5) |
| 17     | C4    | C5    | H5    | 118.5(4) | 61     | H19   | C19   | C20   | 119.9(5) |
| 18     | C4    | C5    | C6    | 123.0(4) | 62     | C19   | C20   | H20   | 120.8(5) |
| 19     | H5    | C5    | C6    | 118.5(4) | 63     | C19   | C20   | C21   | 118.4(5) |
| 20     | C1    | C6    | C5    | 119.7(4) | 64     | H20   | C20   | C21   | 120.8(5) |
| 21     | C1    | C6    | H6    | 120.1(4) | 65     | C16   | C21   | C20   | 123.4(5) |
| 22     | C5    | C6    | H6    | 120.2(5) | 66     | C16   | C21   | H21   | 118.3(5) |
| 23     | C4    | C7    | H7    | 116.9(4) | 67     | C20   | C21   | H21   | 118.4(5) |
| 24     | C4    | C7    | C8    | 126.2(4) | 68     | N2    | C22   | H22   | 118.9(4) |
| 25     | H7    | C7    | C8    | 117.0(4) | 69     | N2    | C22   | C23   | 122.1(4) |
| 26     | C7    | C8    | H8    | 116.5(5) | 70     | H22   | C22   | C23   | 119.0(4) |
| 27     | C7    | C8    | C9    | 127.0(4) | 71     | C22   | C23   | C24   | 121.9(4) |
| 28     | H8    | C8    | C9    | 116.6(4) | 72     | C22   | C23   | C28   | 119.9(4) |
| 29     | C8    | C9    | C10   | 117.8(4) | 73     | C24   | C23   | C28   | 117.9(4) |
| 30     | C8    | C9    | C14   | 124.9(4) | 74     | O2    | C24   | C23   | 120.7(4) |
| 31     | C10   | C9    | C14   | 117.2(4) | 75     | O2    | C24   | C25   | 118.8(4) |
| 32     | C9    | C10   | H10   | 119.7(5) | 76     | C23   | C24   | C25   | 120.4(4) |
| 33     | C9    | C10   | C11   | 120.6(4) | 77     | C24   | C25   | H25   | 120.2(4) |
| 34     | H10   | C10   | C11   | 119.6(5) | 78     | C24   | C25   | C26   | 119.8(4) |
| 35     | C10   | C11   | H11   | 119.6(5) | 79     | H25   | C25   | C26   | 120.1(5) |
| 36     | C10   | C11   | C12   | 120.6(5) | 80     | C25   | C26   | H26   | 119.3(5) |



|    |     |     |     |          |    |     |     |     |          |
|----|-----|-----|-----|----------|----|-----|-----|-----|----------|
| 37 | H11 | C11 | C12 | 119.7(5) | 81 | C25 | C26 | C27 | 121.4(5) |
| 38 | C11 | C12 | H12 | 119.9(5) | 82 | H26 | C26 | C27 | 119.3(5) |
| 39 | C11 | C12 | C13 | 120.2(5) | 83 | C26 | C27 | H27 | 120.7(5) |
| 40 | H12 | C12 | C13 | 119.9(5) | 84 | C26 | C27 | C28 | 118.6(5) |
| 41 | C12 | C13 | H13 | 120.0(5) | 85 | H27 | C27 | C28 | 120.7(5) |
| 42 | C12 | C13 | C14 | 119.8(5) | 86 | C23 | C28 | C27 | 121.9(4) |
| 43 | H13 | C13 | C14 | 120.1(5) | 87 | C23 | C28 | H28 | 119.1(4) |
| 44 | C9  | C14 | C13 | 121.5(5) | 88 | C27 | C28 | H28 | 119.0(5) |

**Table S4** Torsion angles of compound **C1** (°)

| Number | Atom1 | Atom2 | Atom3 | Atom4 | Torsion   | Number | Atom1 | Atom2 | Atom3 | Atom4 | Torsion   |
|--------|-------|-------|-------|-------|-----------|--------|-------|-------|-------|-------|-----------|
| 1      | C15   | N1    | C1    | C2    | -179.9(4) | 65     | C11   | C12   | C13   | H13   | 178.9(5)  |
| 2      | C15   | N1    | C1    | C6    | 0.7(7)    | 66     | C11   | C12   | C13   | C14   | -1.1(8)   |
| 3      | C1    | N1    | C15   | H15   | 0.1(7)    | 67     | H12   | C12   | C13   | H13   | -1.1(9)   |
| 4      | C1    | N1    | C15   | C16   | -179.8(4) | 68     | H12   | C12   | C13   | C14   | 178.9(5)  |
| 5      | C22   | N2    | C3    | C2    | 29.0(6)   | 69     | C12   | C13   | C14   | C9    | 0.4(8)    |
| 6      | C22   | N2    | C3    | C4    | -150.0(4) | 70     | C12   | C13   | C14   | H14   | -179.6(5) |
| 7      | C3    | N2    | C22   | H22   | -4.5(6)   | 71     | H13   | C13   | C14   | C9    | -179.6(5) |
| 8      | C3    | N2    | C22   | C23   | 175.4(4)  | 72     | H13   | C13   | C14   | H14   | 0.4(9)    |
| 9      | H1    | O1    | C17   | C16   | 0.5(6)    | 73     | N1    | C15   | C16   | C17   | -0.8(7)   |
| 10     | H1    | O1    | C17   | C18   | -179.9(4) | 74     | N1    | C15   | C16   | C21   | -177.7(4) |
| 11     | H2    | O2    | C24   | C23   | 0.2(6)    | 75     | H15   | C15   | C16   | C17   | 179.3(4)  |
| 12     | H2    | O2    | C24   | C25   | 179.8(4)  | 76     | H15   | C15   | C16   | C21   | 2.4(7)    |
| 13     | N1    | C1    | C2    | H2A   | -0.5(6)   | 77     | C15   | C16   | C17   | O1    | 2.9(7)    |
| 14     | N1    | C1    | C2    | C3    | 179.4(4)  | 78     | C15   | C16   | C17   | C18   | -176.6(4) |
| 15     | C6    | C1    | C2    | H2A   | 178.8(4)  | 79     | C21   | C16   | C17   | O1    | 179.9(4)  |
| 16     | C6    | C1    | C2    | C3    | -1.2(6)   | 80     | C21   | C16   | C17   | C18   | 0.3(7)    |
| 17     | N1    | C1    | C6    | C5    | -179.6(4) | 81     | C15   | C16   | C21   | C20   | 176.7(5)  |
| 18     | N1    | C1    | C6    | H6    | 0.4(7)    | 82     | C15   | C16   | C21   | H21   | -3.2(7)   |
| 19     | C2    | C1    | C6    | C5    | 1.0(6)    | 83     | C17   | C16   | C21   | C20   | -0.2(7)   |
| 20     | C2    | C1    | C6    | H6    | -179.0(4) | 84     | C17   | C16   | C21   | H21   | 179.8(4)  |
| 21     | C1    | C2    | C3    | N2    | -178.2(4) | 85     | O1    | C17   | C18   | H18   | 0.3(8)    |
| 22     | C1    | C2    | C3    | C4    | 0.8(6)    | 86     | O1    | C17   | C18   | C19   | -179.7(5) |
| 23     | H2A   | C2    | C3    | N2    | 1.7(6)    | 87     | C16   | C17   | C18   | H18   | 179.9(5)  |
| 24     | H2A   | C2    | C3    | C4    | -179.2(4) | 88     | C16   | C17   | C18   | C19   | -0.2(8)   |
| 25     | N2    | C3    | C4    | C5    | 178.8(4)  | 89     | C17   | C18   | C19   | H19   | 179.8(5)  |
| 26     | N2    | C3    | C4    | C7    | 0.4(6)    | 90     | C17   | C18   | C19   | C20   | -0.1(8)   |
| 27     | C2    | C3    | C4    | C5    | -0.2(6)   | 91     | H18   | C18   | C19   | H19   | -0.2(9)   |
| 28     | C2    | C3    | C4    | C7    | -178.7(4) | 92     | H18   | C18   | C19   | C20   | 179.9(5)  |
| 29     | C3    | C4    | C5    | H5    | -179.9(4) | 93     | C18   | C19   | C20   | H20   | -179.7(5) |
| 30     | C3    | C4    | C5    | C6    | 0.1(6)    | 94     | C18   | C19   | C20   | C21   | 0.2(8)    |
| 31     | C7    | C4    | C5    | H5    | -1.5(7)   | 95     | H19   | C19   | C20   | H20   | 0.4(9)    |
| 32     | C7    | C4    | C5    | C6    | 178.5(4)  | 96     | H19   | C19   | C20   | C21   | -179.7(5) |
| 33     | C3    | C4    | C7    | H7    | -15.8(6)  | 97     | C19   | C20   | C21   | C16   | -0.0(8)   |

|    |     |     |     |     |           |     |     |     |     |     |           |
|----|-----|-----|-----|-----|-----------|-----|-----|-----|-----|-----|-----------|
| 34 | C3  | C4  | C7  | C8  | 164.1(4)  | 98  | C19 | C20 | C21 | H21 | 180.0(5)  |
| 35 | C5  | C4  | C7  | H7  | 165.8(4)  | 99  | H20 | C20 | C21 | C16 | 179.9(5)  |
| 36 | C5  | C4  | C7  | C8  | -14.2(7)  | 100 | H20 | C20 | C21 | H21 | -0.2(9)   |
| 37 | C4  | C5  | C6  | C1  | -0.5(7)   | 101 | N2  | C22 | C23 | C24 | -4.8(6)   |
| 38 | C4  | C5  | C6  | H6  | 179.5(4)  | 102 | N2  | C22 | C23 | C28 | -178.0(4) |
| 39 | H5  | C5  | C6  | C1  | 179.5(4)  | 103 | H22 | C22 | C23 | C24 | 175.1(4)  |
| 40 | H5  | C5  | C6  | H6  | -0.5(8)   | 104 | H22 | C22 | C23 | C28 | 1.9(6)    |
| 41 | C4  | C7  | C8  | H8  | -0.7(7)   | 105 | C22 | C23 | C24 | O2  | 7.8(6)    |
| 42 | C4  | C7  | C8  | C9  | 179.2(4)  | 106 | C22 | C23 | C24 | C25 | -171.7(4) |
| 43 | H7  | C7  | C8  | H8  | 179.3(4)  | 107 | C28 | C23 | C24 | O2  | -178.8(4) |
| 44 | H7  | C7  | C8  | C9  | -0.8(7)   | 108 | C28 | C23 | C24 | C25 | 1.6(6)    |
| 45 | C7  | C8  | C9  | C10 | -178.0(5) | 109 | C22 | C23 | C28 | C27 | 172.2(4)  |
| 46 | C7  | C8  | C9  | C14 | 0.0(8)    | 110 | C22 | C23 | C28 | H28 | -7.7(7)   |
| 47 | H8  | C8  | C9  | C10 | 1.9(7)    | 111 | C24 | C23 | C28 | C27 | -1.3(7)   |
| 48 | H8  | C8  | C9  | C14 | 180.0(5)  | 112 | C24 | C23 | C28 | H28 | 178.8(4)  |
| 49 | C8  | C9  | C10 | H10 | -2.6(7)   | 113 | O2  | C24 | C25 | H25 | -0.1(7)   |
| 50 | C8  | C9  | C10 | C11 | 177.4(4)  | 114 | O2  | C24 | C25 | C26 | 179.9(4)  |
| 51 | C14 | C9  | C10 | H10 | 179.2(5)  | 115 | C23 | C24 | C25 | H25 | 179.5(4)  |
| 52 | C14 | C9  | C10 | C11 | -0.8(7)   | 116 | C23 | C24 | C25 | C26 | -0.6(7)   |
| 53 | C8  | C9  | C14 | C13 | -177.5(5) | 117 | C24 | C25 | C26 | H26 | 179.2(5)  |
| 54 | C8  | C9  | C14 | H14 | 2.5(8)    | 118 | C24 | C25 | C26 | C27 | -0.8(7)   |
| 55 | C10 | C9  | C14 | C13 | 0.5(7)    | 119 | H25 | C25 | C26 | H26 | -0.9(8)   |
| 56 | C10 | C9  | C14 | H14 | -179.5(5) | 120 | H25 | C25 | C26 | C27 | 179.1(5)  |
| 57 | C9  | C10 | C11 | H11 | -179.8(5) | 121 | C25 | C26 | C27 | H27 | -178.9(5) |
| 58 | C9  | C10 | C11 | C12 | 0.1(8)    | 122 | C25 | C26 | C27 | C28 | 1.1(8)    |
| 59 | H10 | C10 | C11 | H11 | 0.2(8)    | 123 | H26 | C26 | C27 | H27 | 1.1(9)    |
| 60 | H10 | C10 | C11 | C12 | -179.9(5) | 124 | H26 | C26 | C27 | C28 | -178.9(5) |
| 61 | C10 | C11 | C12 | H12 | -179.2(5) | 125 | C26 | C27 | C28 | C23 | -0.1(7)   |
| 62 | C10 | C11 | C12 | C13 | 0.8(8)    | 126 | C26 | C27 | C28 | H28 | 179.9(5)  |
| 63 | H11 | C11 | C12 | H12 | 0.8(9)    | 127 | H27 | C27 | C28 | C23 | 180.0(5)  |
| 64 | H11 | C11 | C12 | C13 | -179.3(5) | 128 | H27 | C27 | C28 | H28 | -0.1(8)   |

---

### 3. Synthesis of the intermediates and the final compounds

#### Synthesis of Intermediates

##### **Intermediate 1, 1, 2-dinitro-4-styrylbenzene**

The known **intermediate 1** was synthesized as described in our previously work in Ref. 1. The characterization data in our report presents as follow: the desired product as the yellow needle solid (yield, 50%, m.p. 140.8-142.0 °C). <sup>1</sup>H-NMR (500 MHz, DMSO-*d*<sub>6</sub>) δ (ppm): 7.532-7.517 (d, *J*=7.5 Hz, Ar-H, 2H), 7.304-7.273 (t, *J*=7.75 Hz, Ar-H, 2H; -CH=CH-, 1H), 7.175-7.158 (d, *J*=8.5 Hz, Ar-H, 1H), 7.140-7.111 (d, *J*=7.5 Hz, Ar-H, 1H), 6.693-6.661 (d, *J*=16.0 Hz, CH=CH, 1H), 5.899-5.863 (m, Ar-H, 2H), 5.026 (s, -NH<sub>2</sub>, 4H). Elementary analysis, Anal. Calcd for C<sub>14</sub>H<sub>10</sub>N<sub>2</sub>O<sub>4</sub>: C, 62.22; H, 3.73; N, 10.37. Found: C, 62.29; H, 3.65; N, 10.41.

##### **Intermediate 2, 1,2-diamine-4-styrylbenzene**

The known **intermediate 2** was synthesized as described in our previously work in Ref. 1. The characterization data in our report presents as follow: the desired product as the faint yellow solid (yield, 15%, m.p. 117.6-119.7 °C). <sup>1</sup>H-NMR (500 MHz, DMSO-*d*<sub>6</sub>) δ (ppm): 7.532-7.517 (d, *J*=7.5 Hz, Ar-H, 2H), 7.304-7.273 (t, *J*=7.75 Hz, Ar-H, 2H; -CH=CH-, 1H), 7.175-7.158 (d, *J*=8.5 Hz, Ar-H, 1H), 7.140-7.111 (d, *J*=7.5 Hz, Ar-H, 1H), 6.693-6.661 (d, *J*=16.0 Hz, CH=CH, 1H), 5.899-5.863 (m, Ar-H, 2H), 5.026 (s, -NH<sub>2</sub>, 4H). Elementary analysis, Anal. Calcd for C<sub>14</sub>H<sub>14</sub>N<sub>2</sub>: C, 79.97; H, 6.71; N, 13.32. Found: C, 80.08; H, 6.60; N, 13.41.

##### **Intermediate 3, 2, 4-(4'-methoxy-cinnameryl)-dinitro-benzene**

The known **intermediate 3** was synthesized as described in our previously work in Ref. 1.

---

The characterization data in our report presents as follow: (yield, 50%, m.p. 160.0-162.1 °C). <sup>1</sup>H-NMR (500 MHz, DMSO-*d*<sub>6</sub>) δ (ppm): 8.805 (s, Ar-H, 1H), 8.409-8.392 (d, *J*=8.5 Hz, Ar-H, 1H), 7.981-7.965 (d, *J*=8.0 Hz, Ar-H, 1H), 7.543-7.526 (d, *J*=8.5 Hz, Ar-H, 2H), 7.493 (s, CH=CH, 1H), 7.289 (s, CH=CH, 1H), 6.958-6.943 (d, *J*=7.5 Hz, Ar-H, 2H), 3.865 (s, -OCH<sub>3</sub>, 3H). Elementary analysis, Anal. Calcd for C<sub>15</sub>H<sub>12</sub>N<sub>2</sub>O<sub>5</sub>: C, 60.01; H, 4.02; N, 9.33. Found: C, 60.12; H, 3.89; N, 9.41.

#### **Intermediate 4, 2, 4-(4'-methoxy-cinnameryl)-diaminyl-benzene**

The known **intermediate 4** was synthesized as described in our previously work in Ref. 1. The characterization data in our report presents as follow: The desired product was obtained as the faint yellow solid (yield, 18%, m.p. 141.0-142.9 °C). <sup>1</sup>H-NMR (500 MHz, DMSO-*d*<sub>6</sub>) δ (ppm): 7.465-7.448 (m, Ar-H, 2H), 7.126-7.096 (m, Ar-H, 2H), 6.883-6.865 (m, Ar-H, 2H), 6.639-6.607 (d, *J*=16.0 Hz, Ar-H, 1H), 5.882-5.885 (m, CH=CH, 2H), 4.946 (s, -NH<sub>2</sub>, 4H), 3.747 (s, -OCH<sub>3</sub>, 3H). Elementary analysis, Anal. Calcd for C<sub>15</sub>H<sub>16</sub>N<sub>2</sub>O: C, 74.97; H, 6.71; N, 11.66. Found: C, 75.03; H, 6.65; N, 11.72.

#### **Intermediate 5, 2, 4-(3', 4'-Dimethoxy-cinnameryl)-dinitro-benzene**

The known **intermediate 5** was synthesized as described in our previously work in Ref. 1. The characterization data in our report presents as follow: The red solid product was gained (yield, 55%, m.p. 143.0-144.0 °C). <sup>1</sup>H-NMR (500 MHz, DMSO-*d*<sub>6</sub>) δ (ppm): 8.732-8.727 (d, *J*=2.5 Hz, CH=CH, 1H), 8.491-8.469 (m, Ar-H, 1H), 8.241-8.223 (d, *J*=9.0 Hz, Ar-H, 1H), 7.586-7.554 (d, *J*=15.0 Hz, Ar-H, 1H), 7.410-7.378 (d, *J*=16.0 Hz, Ar-H, 1H), 7.293-7.290 (d, *J*=1.5 Hz, CH=CH, 1H), 7.248-7.231 (d, *J*=8.5 Hz, Ar-H, 1H), 7.039-7.022 (d, *J*=8.5 Hz, Ar-H, 1H), 3.822 (s, -OCH<sub>3</sub>, 3H), 3.805 (s, -OCH<sub>3</sub>, 3H). Elementary analysis, Anal. Calcd for C<sub>16</sub>H<sub>14</sub>N<sub>2</sub>O<sub>6</sub>: C, 58.18; H, 4.27;

---

N, 8.48. Found: C, 58.27; H, 4.19; N, 8.54.

#### **Intermediate 6, 2, 4-(3', 4'-Dimethoxy-cinnamenyl)-diaminyl-benzene**

The known **intermediate 6** was synthesized as described in our previously work in Ref. 1. The characterization data in our report presents as follow: The desired product was obtained as the faint yellow solid (yield, 20%, m.p. 176.6-177.8 °C). <sup>1</sup>H-NMR (500 MHz, DMSO-*d*<sub>6</sub>) δ (ppm): 7.216-7.200 (d, *J*=8.0 Hz, Ar-H, 1H), 7.022-7.019 (d, *J*=1.5 Hz, CH=CH, 1H), 7.007-6.990 (d, *J*=8.5 Hz, Ar-H, 1H), 6.955-6.923 (d, *J*=16.0 Hz, Ar-H, 1H), 6.847-6.831 (d, *J*=8.0 Hz, Ar-H, 1H), 6.798-6.766 (d, *J*=16.0 Hz, Ar-H, 1H), 6.191-6.170 (m, Ar-H, 1H), 6.060-6.056 (d, *J*=2.0 Hz, -CH=CH-, 1H), 5.29 (s, -NH<sub>2</sub>, 4H), 3.923 (s, -OCH<sub>3</sub>, 3H), 3.890 (s, -OCH<sub>3</sub>, 3H). Elementary analysis, Anal. Calcd for C<sub>16</sub>H<sub>18</sub>N<sub>2</sub>O<sub>2</sub>: C, 71.09; H, 6.71; N, 10.36. Found: C, 71.18; H, 6.62; N, 10.43.

#### **Intermediate 7, 3, 5-(4'-methoxy-cinnamenyl)-dinitro-benzene**

The known **intermediate 7** was synthesized as described in our previously work in Ref. 1. The characterization data in our report presents as follow: The desired product was obtained as the yellow solid (yield, 38%, m.p. 137.2-139.1 °C). <sup>1</sup>H-NMR (500 MHz, CDCl<sub>3</sub>) δ (ppm): 8.849 (s, Ar-H, 1H), 8.429 (s, Ar-H, 1H), 7.160-7.146 (d, *J*=7.0 Hz, -CH=CH-, 2H), 6.916-6.892 (d, *J*=12.0 Hz, Ar-H, 1H), 6.833-6.819 (d, *J*=7.0 Hz, Ar-H, 2H), 6.566-6.542 (d, *J*=12.0 Hz, Ar-H, 1H), 3.825 (s, -OCH<sub>3</sub>, 3H). Elementary analysis, Anal. Calcd for C<sub>15</sub>H<sub>12</sub>N<sub>2</sub>O<sub>5</sub>: C, 60.01; H, 4.02; N, 9.33. Found: C, 60.12; H, 3.94; N, 9.40.

#### **Intermediate 8, 3, 5-(4'-Methoxy-cinnamenyl)-diaminyl-benzene**

The known **intermediate 8** was synthesized as described in our previously work in Ref. 1. The characterization data in our report presents as follow: The desired product was obtained as the



---

faint yellow solid (yield, 20%, m.p., 145.6-147.2 °C). <sup>1</sup>H-NMR (600 MHz, DMSO-*d*<sub>6</sub>) δ (ppm): 7.45-7.44 (d, *J*=6.0 Hz, Ar-H, 2H), 6.90-6.89 (d, *J*=6.0 Hz, Ar-H, 2H), 6.84-6.82 (d, *J*=12.0 Hz, Ar-H, 1H), 6.76-6.73 (d, *J*=18.0 Hz, Ar-H, 1H), 5.988-5.986 (d, *J*=12.0 Hz, -CH=CH-, 2H), 5.743 (s, Ar-H, 1H), 4.690 (s, -NH<sub>2</sub>, 4H), 3.745 (s, -OCH<sub>3</sub>, 3H). Elementary analysis, Anal. Calcd for C<sub>15</sub>H<sub>16</sub>N<sub>2</sub>O: C, 74.97; H, 6.71; N, 11.66. Found: C, 75.03; H, 6.65; N, 11.72.

#### **Intermediate 9, 2-(4'-Methoxy-cinnamenyl)-nitro-benzene**

In a three-necked flask equipped with a magnetic stirrer, 4-methoxy-benzaldehyde, 2-nitrophenyl acetic acid and piperidine were added with the molar ratio of 1:3:3. The mixture was heated to 100 °C for 3 hours with stirring, then the reaction was kept at 130 °C for 5 hours. After the reaction, the product was then extracted with CH<sub>2</sub>Cl<sub>2</sub> three times. The combined organic layer was dried by anhydrous MgSO<sub>4</sub>. The solvent was removed under reduced pressure to leave the crude product. which was further purified by column chromatography (C<sub>6</sub>H<sub>12</sub>:CH<sub>2</sub>Cl<sub>2</sub>=2:1) to afford the desired product as yellow needle solid (yield, 75%, m.p., 126.4-127.8 °C). <sup>1</sup>H-NMR (500 MHz, DMSO-*d*<sub>6</sub>) δ (ppm): 7.968-7.927 (m, Ar-H, 2H), 7.723-7.693 (t, *J*=7.5 Hz, Ar-H, 1H), 7.562-7.546 (d, *J*=8.0 Hz, Ar-H, 2H), 7.505-7.474 (t, *J*=7.75 Hz, CH=CH, 1H), 7.335-7.260 (m, Ar-H, CH=CH, 1H), 6.983-6.966 (d, *J*=8.5 Hz, Ar-H, 2H), 3.784 (s, -OCH<sub>3</sub>, 3H). Elementary analysis, Anal. Calcd for C<sub>15</sub>H<sub>13</sub>NO<sub>3</sub>: C, 70.58; H, 5.13; N, 5.49. Found: C, 70.63; H, 5.06; N, 5.54.

#### **Intermediate 10, 2-(4'-Methoxy-cinnamenyl)-aminyl-benzene**

The mixed aqueous solution of sodium sulfide hydrate (5.6 g, 23 mmol) and sodium hydroxide (2.2 g, 55 mol) was dropped into a solution of 2-(4'-methoxy-cinnamenyl)-nitro-benzene (5 mmol, 1.4 g) in 100 ml ethanol, the mixed solution was stirred at 60°C for 2-3h. After

---

the reaction, the solvent was removed under vacuum and the residue was extracted with CH<sub>2</sub>Cl<sub>2</sub> three times. The combined organic layer was dried by anhydrous MgSO<sub>4</sub>, and the solvent was removed under reduced pressure to gain the crude product, which was further purified by column chromatography (C<sub>6</sub>H<sub>12</sub>:EtOAc=4:1, v/v) to afford desired product as faint yellow solid (yield, 55 %, m.p., 118.5-120.0 °C). <sup>1</sup>H-NMR (500 MHz, DMSO-*d*<sub>6</sub>) δ (ppm): 7.574-7.545 (m, Ar-H, 2H), 7.404-7.366 (m, Ar-H, 1H), 7.253-7.220 (d, *J*=16.5 Hz, CH=CH, 1H), 6.947-6.906 (m, Ar-H, 4H), 6.639-6.623 (d, *J*=8.0 Hz, Ar-H, 1H), 6.548-6.518 (t, *J*=7.5 Hz, Ar-H, 1H), 5.290 (s, -NH<sub>2</sub>, 2H), 3.768 (s, -OCH<sub>3</sub>, 3H). Elementary analysis, Anal. Calcd for C<sub>15</sub>H<sub>15</sub>NO: C, 79.97; H, 6.71; N, 6.66. Found: C, 80.04; H, 6.67; N, 6.72.

#### **Intermediate 11, 4-Methoxyl-3'-nitro-diphenylethylene**

The synthesis of **intermediate 11** followed essentially the same procedure as described that of **intermediate 9**, in which 2-nitrophenyl acetic acid was replaced by 3-nitrophenyl acetic acid in synthetic process. (yield, 53%, m.p. 112.2-113.8 °C). <sup>1</sup>H-NMR (400 MHz, DMSO-*d*<sub>6</sub>) δ (ppm): 8.384 (s, Ar-H, 1H), 8.075-8.021 (m, Ar-H, 2H), 7.649-7.595 (m, Ar-H, 3H), 7.460-7.419 (d, *J*=16.4 Hz, Ar-H, 1H), 7.289-7.247 (d, *J*= 16.8 Hz, Ar-H, 1H), 6.993-6.972 (d, *J*=8.4 Hz, CH=CH, 2H), 3.791 (s, -OCH<sub>3</sub>, 3H). Elementary analysis, Anal. Calcd for C<sub>15</sub>H<sub>13</sub>NO<sub>3</sub>: C, 70.58; H, 5.13; N, 5.49. Found: C, 70.64; H, 5.07; N, 5.52.

#### **Intermediate 12, 4-Methoxyl-3'-amine-diphenylethylene**

The synthesis of **intermediate 12** followed essentially the same procedure as described that of **intermediate 10**, in which 2-(4'-methoxy-cinnamenyl)-nitro-benzene was replaced by 3-(4'-methoxy-cinnamenyl)-nitro-benzene in synthetic process (yield, 53%, m.p., 135.1-136.8 °C). <sup>1</sup>H-NMR (400 MHz, DMSO-*d*<sub>6</sub>) δ (ppm): 7.495-7.473 (d, *J*=8.8 Hz, Ar-H, 2H), 7.012-6.971 (m, Ar-

---

H, 2H), 6.923-6.883 (m, Ar-H, 3H), 6.727-6.710 (d,  $J=6.8$  Hz, 2H), 6.462-6.422 (d,  $J=16.0$  Hz, Ar-H, 1H), 5.020 (s, -NH<sub>2</sub>, 2H), 3.746 (s, -OCH<sub>3</sub>, 3H). Elementary analysis, Anal. Calcd for C<sub>15</sub>H<sub>15</sub>NO: C, 79.97; H, 6.71; N, 6.66. Found: C, 80.09, H, 6.65; N, 6.71.

### **Intermediate 13, 4-Methoxyl-4'-nitro-diphenylethylene**

The synthesis of intermediate 13 followed essentially the same procedure as described that of **intermediate 11**, red solid product was gained (yield, 59%, m.p., 158.2-159.6 °C). <sup>1</sup>H-NMR (500 MHz, CDCl<sub>3</sub>)  $\delta$  (ppm): 8.206-8.188 (d,  $J=9.0$  Hz, Ar-H, 2H), 7.599-7.581 (d,  $J=9.0$  Hz, Ar-H, 2H), 7.501-7.484 (d,  $J=8.5$  Hz, Ar-H, 2H), 7.237-7.204 (t,  $J=8.25$  Hz, Ar-H, 1H), 7.018-6.986 (d,  $J=16.0$  Hz, Ar-H, 1H), 6.937-6.919 (d,  $J=9.0$  Hz, CH=CH, 2H), 3.848 (s, -OCH<sub>3</sub>, 3H). Elementary analysis, Anal. Calcd for C<sub>15</sub>H<sub>13</sub>NO<sub>3</sub>: C, 70.58; H, 5.13; N, 5.49. Found: C, 70.65; H, 5.04; N, 5.57.

### **Synthesis of target compounds**

#### **Target C1, 2, 2'-(4''-Styryl-1'', 3''-phenylene)-bis(ylidene)-bis-(methyl)diphenol**

The known **target C1** was synthesized as described in our previously work in Ref. 1. The characterization data in our report presents as follow: The desired product was obtained as the pale yellow solid (yield, 25%, m.p. 162.6-163.8 °C). <sup>1</sup>H-NMR (500 MHz, DMSO-*d*<sub>6</sub>)  $\delta$  (ppm): 13.058 (s, -OH, 1H), 13.005 (s, -OH, 1H), 9.110 (s, N=CH, 1H), 9.046 (s, N=CH, 1H), 7.945-7.928 (d,  $J=8.5$  Hz, Ar-H, 1H), 7.751-7.733 (m, Ar-H, 1H), 7.686-7.668 (m, Ar-H, 1H), 7.571-7.502 (m, Ar-H, 4H), 7.485-7.393 (m, Ar-H, 6H), 7.363-7.280 (m, CH=CH, 2H), 7.053-6.986 (m, Ar-H, 4H). <sup>13</sup>C-NMR (125 MHz, DMSO-*d*<sub>6</sub>)  $\delta$  (ppm): 164.237, 163.471, 160.330, 148.267, 147.181, 137.082, 133.624, 133.456, 132.548, 130.376, 128.868, 127.929, 126.949, 126.415, 123.056, 120.205, 119.617, 119.332, 119.235, 116.698, 112.134. FT-IR (cm<sup>-1</sup>): 3434.5, 3051.5, 3024.3, 2923.6,

---

2853.3, 2727.1, 1613.9, 1589.4, 1565.9, 1492.3, 1481.5, 1456.6, 1281.4, 961.1, 901.4, 875.2, 810.5, 756.2. HRMS (ESI)  $m/z$ : calcd for  $C_{28}H_{22}N_2O_2$   $[M+H]^+$  419.1681, found 419.1685. Elementary analysis, Anal. Calcd for  $C_{28}H_{22}N_2O_2$ : C, 80.36; H, 5.30; N, 6.69. Found: C, 80.42; H, 5.25; N, 6.76.

**Target C2, 2'-(4''-(4''-methoxystyryl)-1'', 3''-phenylene)bis(ylidene)-bis-(methyl)diphenol**

The known **target C2** was synthesized as described in our previously work in Ref. 1. The characterization data in our report presents as follow: The desired product was obtained as the pale yellow solid (yield, 15%, m.p. 137.0-139.0 °C).  $^1H$ -NMR (500 MHz, DMSO- $d_6$ )  $\delta$  (ppm): 13.095 (s, -OH, 1H), 13.076 (s, -OH, 1H), 9.111 (s, N=CH, 1H), 9.044 (s, N=CH, 1H), 7.912-7.896 (d,  $J=8.0$  Hz, Ar-H, 1H), 7.746-7.732 (d,  $J=7.0$  Hz, Ar-H, 1H), 7.682-7.669 (d,  $J=6.5$  Hz, Ar-H, 1H), 7.516-7.426 (m, Ar-H, 6H), 7.412-7.226 (m, CH=CH, 2H), 7.054-6.981 (m, Ar-H, 6H), 3.784 (s, -OCH<sub>3</sub>, 3H).  $^{13}C$ -NMR (DMSO, 125 MHz, TMS):  $\delta$ =164.113, 163.261, 160.342, 159.213, 147.783, 146.796, 133.398, 132.534, 130.080, 129.736, 127.761, 126.594, 120.644, 120.209, 119.605, 119.320, 119.222, 116.682, 116.650, 114.363, 112.080, 55.160. FT-IR ( $cm^{-1}$ ): 3431.4, 3057.6, 3029.9, 3001.9, 2951.4, 2924.6, 2852.6, 2836.5, 2831.2, 1609.6, 1569.4, 1550.5, 1511.6, 1479.6, 1456.6, 1282.5, 1251.9, 969.7, 908.2, 855.3, 830.8, 809.3, 754.2. HRMS (ESI)  $m/z$ : calcd for  $C_{29}H_{24}N_2O_3$   $[M-H]^+$  447.1787, found 447.1790. Elementary analysis, Anal. Calcd for  $C_{29}H_{24}N_2O_3$ : C, 77.66; H, 5.39; N, 6.25. Found: C, 77.70; H, 5.27; N, 6.33.

**Target C3**

**2,2'-(4''-(3''',4'''-dimethoxystyryl)-1'',3''-phenylene)bis(ylidene)-bis-(methyl)diphenol**

The known target **C3** was synthesized as described in our previously work in Ref. 1. The characterization data in our report presents as follow: The desired product was obtained as the

---

faint yellow solid (yield, 28%, m.p. 153.0-155.0 °C). <sup>1</sup>H-NMR (500 MHz, DMSO-*d*<sub>6</sub>) δ (ppm): 13.191 (s, -OH, 1H), 13.101 (s, -OH, 1H), 9.102 (s, N=CH, 1H), 9.060 (s, N=CH, 1H), 7.893-7.876 (d, *J*=8.5 Hz, Ar-H, 1H), 7.744-7.729 (d, *J*=7.5 Hz, Ar-H, 1H), 7.681-7.666 (d, *J*=7.5 Hz, Ar-H, 1H), 7.526-7.524 (d, *J*=1.0 Hz, CH=CH, 1H), 7.484-7.423 (m, Ar-H, 4H), 7.269-7.236 (d, *J*=16.5 Hz, Ar-H, 1H), 7.197-7.194 (d, *J*=1.5 Hz, CH=CH, 1H), 7.107-7.090 (d, *J*=8.5 Hz, Ar-H, 1H), 7.046-6.982 (m, Ar-H, 5H), 3.827 (s, -OCH<sub>3</sub>, 3H), 3.782 (s, -OCH<sub>3</sub>, 3H). <sup>13</sup>C-NMR (125 MHz, DMSO-*d*<sub>6</sub>) δ (ppm): 163.908, 163.240, 160.452, 160.344, 148.956, 148.907, 133.565, 132.588, 132.535, 130.316, 130.149, 130.085, 126.581, 121.038, 120.242, 119.595, 119.319, 119.289, 119.212, 116.649, 111.941, 109.458, 55.500, 55.319. FT-IR (cm<sup>-1</sup>): 3433.0, 3053.9, 3002.3, 2932.0, 2903.7, 2833.8, 1615.8, 1588.4, 1565.7, 1513.4, 1480.7, 1456.0, 1280.4, 1263.7, 961.6, 901.5, 876.9, 845.5, 806.1, 755.1. HRMS (ESI) *m/z*: calcd for C<sub>30</sub>H<sub>26</sub>N<sub>2</sub>O<sub>4</sub> [M-H]<sup>-</sup> 477.1893, found 477.1896. Elementary analysis, Anal. Calcd for C<sub>30</sub>H<sub>26</sub>N<sub>2</sub>O<sub>4</sub>: C, 75.30; H, 5.48; N, 5.85. Found: C, 75.43; H, 5.37; N, 5.92.

**Target C4, 2, 2'-((5-(2-phenylethenyl)-benzene-1, 3-diy)-bis-(nitrile-methylidene))diphenol**

5-Styryl-benzene-1, 3-diamine (0.21 g, 1.00 mmol) and 2-hydroxy-benzaldehyde (0.488 g, 4.00 mmol) in 100 ml dry ethanol were added into three-necked flask. The reaction mixture was stirred at room temperature under argon protection for 12 h. After the reaction, the solvent was evaporated under vacuum. Recrystallization from ethanol and cyclohexane gave the pure product as the yellow solid. Yield, 69%, m.p. 163.0-164.2 °C. <sup>1</sup>H-NMR (400 MHz, DMSO-*d*<sub>6</sub>) δ (ppm): 12.828 (s, -OH, 2H), 8.902 (s, CH=N, 2H), 7.608-7.587 (d, *J*=8.6 Hz, Ar-H, 3H), 7.425-7.360 (m, Ar-H, 3H), 7.238-7.150 (m, Ar-H, 4H), 6.987-6.939 (m, Ar-H, 4H), 6.869-6.847 (d, *J*=8.8 Hz, -CH=CH-, 2H), 6.691-6.579 (m, Ar-H, 2H). <sup>13</sup>C-NMR (101 MHz, DMSO-*d*<sub>6</sub>) δ



---

(ppm):164.499, 160.673, 159.124, 149.794, 139.936, 133.960, 132.922, 131.425, 130.414, 129.168, 127.810, 120.472, 119.646, 117.082, 114.321, 112.978. FT-IR (cm<sup>-1</sup>): 3433.2, 3047.2, 3023.3, 2921.1, 2844.5, 2725.2, 1614.7, 1585.3, 1556.2, 1483.1, 1477.1, 1455.7, 1278.8, 958.9, 907.4, 872.3, 809.5, 758.4. HRMS (ESI) m/z: calcd for C<sub>28</sub>H<sub>22</sub>N<sub>2</sub>O<sub>2</sub> [M+H]<sup>+</sup> 419.1681, found 419.1687. Elementary analysis, Anal. Calcd for C<sub>28</sub>H<sub>22</sub>N<sub>2</sub>O<sub>2</sub>: C, 80.36; H, 5.30; N, 6.69. Found: C, 80.44; H, 5.21; N, 6.75.

### **Target C5**

#### **2, 2'-((5-(2-(4-methoxyphenyl)ethenyl)benzene-1, 3-diyl)-bis-(nitrilomethylylidene))-diphenol**

The known target **C5** was synthesized as described in our previously work in Ref. 1. The characterization data in our report presents as follow: The desired product was obtained as faint yellow solid (yield, 53%, m.p. 170.6-172.8 °C). <sup>1</sup>H-NMR (400 MHz, DMSO-*d*<sub>6</sub>) δ (ppm): 13.006 (s, -OH, 2H), 9.093 (s, CH=N, 2H), 7.688-7.669 (d, J=7.6 Hz, -CH=CH-, 2H), 7.576-7.556 (d, J=8.0 Hz, Ar-H, 4H), 7.449-7.390 (m, Ar-H, 4H), 7.205-7.164 (d, Ar-H, 1H), 7.017-6.957 (m, Ar-H, 6H), 3.773 (s, -OCH<sub>3</sub>, 3H). <sup>13</sup>C-NMR (151 MHz, DMSO-*d*<sub>6</sub>) δ (ppm): 164.666, 160.789, 159.669, 150.032, 140.322, 133.934, 133.066, 130.198, 129.873, 128.401, 125.525, 119.718, 119.671, 118.273, 117.109, 114.722, 112.772, 55.620. FT-IR (cm<sup>-1</sup>): 3435.3, 3052.3, 3030.2, 3010.6, 2959.2, 2933.8, 2850.7, 2839.4, 1611.7, 1571.3, 1560.2, 1518.5, 1481.6, 1450.1, 1279.2, 1243.4, 973.4, 901.1, 862.2, 839.2, 810.3, 759.1. HRMS (ESI) m/z: calcd for C<sub>29</sub>H<sub>24</sub>N<sub>2</sub>O<sub>3</sub> [M+H]<sup>+</sup> 449.1787, found 449.1789. Elementary analysis, Anal. Calcd for C<sub>29</sub>H<sub>24</sub>N<sub>2</sub>O<sub>3</sub>: C, 77.66; H, 5.39; N, 6.25. Found: C, 77.72; H, 5.31; N, 6.32.

### **Target C6, 1, 3-dikis(iminyl-methyl)-bistyrene**

The known target **C6** was synthesized as described in our previously work in Ref. 1. The

---

characterization data in our report presents as follow: The desired product was obtained as the pale yellow solid (yield, 27%, m.p. 161.3-162.6 °C). <sup>1</sup>H-NMR (400 MHz, DMSO-*d*<sub>6</sub>) δ (ppm): 8.751 (s, N=CH, 1H), 8.683 (s, N=CH, 1H), 8.037-8.013 (m, Ar-H, 2H), 7.959-7.935 (m, Ar-H, 2H), 7.850-7.829 (d, J=8.4Hz, CH=CH, 1H), 7.645-7.604 (d, J=16.4 Hz, CH=CH,1H), 7.568-7.522 (m, Ar-H, 8H), 7.379-7.341 (t, J=7.6 Hz, Ar-H, 2H), 7.287-7.210 (m, Ar-H, 3H), 7.104-7.099 (d, J=2.0 Hz, Ar-H, 1H). <sup>13</sup>C-NMR (101 MHz, DMSO-*d*<sub>6</sub>) δ (ppm): 161.524, 161.042, 151.863, 150.494, 137.885, 136.548, 136.473, 132.096, 131.979, 129.381, 129.278, 129.227, 129.155, 127.994, 127.036, 126.752, 124.636, 119.806, 111.555. FT-IR (cm<sup>-1</sup>): 2931.3, 2911.8, 1630.1, 1584.5, 1553.9, 1495.7 1451.2, 975.9, 963.5, 896.4, 875.2, 818.2, 757.8. MS(ESI) m/z: calcd for C<sub>28</sub>H<sub>22</sub>N<sub>2</sub> [M+H]<sup>+</sup> 387.1783, found 387.1788. Elementary analysis, Anal. Calcd for C<sub>28</sub>H<sub>22</sub>N<sub>2</sub>: C, 87.01; H, 5.74; N, 7.25. Found: C, 87.11; H, 5.67; N, 7.32.

#### **Target C7, 1, 3-Dikis(iminyl-methyl)-(4''-methoxy)-bistyrene**

The known target **C7** was synthesized as described in our previously work in Ref. 1. The characterization data in our report presents as follow: The desired product was obtained as the pale yellow solid (yield, 46%, m.p. 138.5-139.6 °C) <sup>1</sup>H-NMR (400 MHz, DMSO-*d*<sub>6</sub>) δ (ppm): 8.737 (s, -N=CH-, 1H), 8.661 (s, -N=CH-, 1H), 8.021-7.998 (m, Ar-H, 2H), 7.944-7.921 (m, Ar-H, 2H), 7.797-7.777 (d, J=8.0 Hz, CH=CH, 1H), 7.554-7.438 (m, Ar-H, 8H), 7.217-7.176 (m, Ar-H, 2H), 7.079-7.075 (d, J=2.0 Hz, Ar-H, 1H), 6.932-6.910 (d, J=8.8 Hz, Ar-H, 2H) 3.736 (s, -OCH<sub>3</sub>, 3H). <sup>13</sup>C-NMR (151 MHz, DMSO-*d*<sub>6</sub>) δ (ppm): 161.384, 160.860, 159.393, 151.387, 150.194, 136.592, 136.516, 132.077, 131.955, 130.575, 129.616, 129.393, 129.299, 129.258, 129.199, 129.128, 129.073, 129.010, 128.943, 128.808, 128.070, 126.772, 126.667, 122.316, 119.844, 114.816, 114.738, 111.524, 55.589, IR(cm<sup>-1</sup>): 2863.4, 2831.0, 1607.1, 1573.7, 1505.3, 1453.2, 1243.9,

---

1175.8, 1031.2, 968.0, 834.3, 768.8. HRMS (ESI) m/z: calcd for C<sub>29</sub>H<sub>24</sub>N<sub>2</sub>O [M-H]<sup>-</sup> 415.1889, found 415.1891. Elementary analysis, Anal. Calcd for C<sub>29</sub>H<sub>24</sub>N<sub>2</sub>O: C, 83.63; H, 5.81; N, 6.73. Found: C, 83.71; H, 5.76; N, 6.82.

**Target C8, 1, 3-Dikis(iminyl-methyl)-(3'', 4''-dimethoxy)-bistyrene**

The known target **C8** was synthesized as described in our previously work in Ref. 1. The characterization data in our report presents as follow: The desired product was obtained as the pale yellow solid the faint yellow solid (yield, 30%, m.p. 157.2-159.1 °C) .C<sub>30</sub>H<sub>26</sub>N<sub>2</sub>O<sub>2</sub>, <sup>1</sup>H-NMR (400 MHz, DMSO-*d*<sub>6</sub>) δ (ppm): 8.742 (s, N=CH, 1H), 8.669 (s, N=CH, 1H), 8.024-8.006 (m, Ar-H, 2H), 7.941-7.923 (m, Ar-H, 2H), 7.784-7.736 (d, J=19.2 Hz, CH=CH, 1H), 7.549-7.467 (m, Ar-H, 7H), 7.212-7.161 (m, Ar-H, 2H), 7.096-7.041 (m, Ar-H, 3H), 6.942-6.921 (d, J=8.4 Hz, Ar-H, 1H), 3.774 (s, -OCH<sub>3</sub>, 3H), 3.734 (s, -OCH<sub>3</sub>, 3H).<sup>13</sup>C-NMR (151 MHz, DMSO-*d*<sub>6</sub>) δ (ppm): 161.282, 160.878, 157.740, 151.388, 150.128, 149.338, 149.150, 136.621, 136.617, 132.083, 131.961, 130.945, 129.790, 129.639, 129.532, 129.380, 129.303, 129.237, 129.129, 126.817, 122.743, 119.844, 119.712, 119.215, 115.647, 112.466, 111.514, 109.984, 55.980, 55.824. FT-IR (cm<sup>-1</sup>): 2821.8, 1635.7, 1573.0, 1516.0, 1463.8, 1451.5, 1438.1, 1270.8, 1229.0, 1126.5, 1025.8, 958.3, 857.7, 830.8, 801.1, 771.0, 749.8. HRMS (ESI) m/z: calcd for C<sub>30</sub>H<sub>26</sub>N<sub>2</sub>O<sub>2</sub> [M+H]<sup>+</sup>447.1994, found 447.1997. Elementary analysis, Anal. Calcd for C<sub>30</sub>H<sub>26</sub>N<sub>2</sub>O<sub>2</sub>: C, 80.69; H, 5.87; N, 6.27. Found: C, 80.73; H, 5.77; N, 6.31.

**Target C9, N, N'-(5-(2-phenylethenyl)-benzene-1,3-diyl)-bis-(1-phenylmethanimine)**

The synthetic procedure and method were the same as described in the synthetic process of target **C4**, in which 2-hydroxy-benzaldehyde was replaced by benzaldehyde in the synthetic process. Yellow solid was obtained, yield, 61.5%, m.p. 152.0-153.5 °C. <sup>1</sup>H-NMR (400 MHz,

---

DMSO-*d*<sub>6</sub>) δ (ppm): 8.545 (s, -CH=N, 2H), 7.782-7.716 (m, Ar-H, 5H), 7.540-7.519 (d, J=8.4 Hz, Ar-H, 3H), 7.329-7.289 (d, J=16.0 Hz, -CH=CH-, 1H), 7.222 (s, Ar-H, 2H), 7.125-7.084 (d, J=16.4 Hz, -CH=CH-, 1H), 6.941-6.859 (m, Ar-H, 8H). <sup>13</sup>C-NMR (101 MHz, DMSO-*d*<sub>6</sub>) δ (ppm): 161.194, 160.803, 158.951, 153.343, 139.166, 132.553, 131.140, 130.858, 130.638, 130.417, 129.474, 129.444, 128.568, 127.762, 118.649, 116.345, 116.105, 116.045, 114.261, 114.029, 112.176. IR(cm<sup>-1</sup>): 2938.2, 2919.5, 1639.2, 1579.9, 1559.8, 1490.3, 1449.6, 969.7, 958.3, 891.3, 869.1, 820.4, 760.2. HRMS (ESI) m/z: calcd for C<sub>28</sub>H<sub>22</sub>N<sub>2</sub> [M+H]<sup>+</sup> 387.1783, found 387.1787. Elementary analysis, Anal. Calcd for C<sub>28</sub>H<sub>22</sub>N<sub>2</sub>: C, 87.01; H, 5.74; N, 7.25. Found: C, 87.12; H, 5.65; N, 7.31.

### Target C10

#### **N, N'-(5-(2-(4-methoxyphenyl)-ethenyl)-benzene-1, 3-diyl)-bis-(1-phenylmethanimine)**

The known target **C10** was synthesized as described in our previously work in Ref. 1. The characterization data in our report presents as follow: The desired product was obtained as the pale yellow solid as the white solid (yield, 47%, m.p. 158.8-159.9 °C) <sup>1</sup>H-NMR (400 MHz, DMSO-*d*<sub>6</sub>) δ (ppm): 8.743 (s, -CH=N, 2H), 7.973-7.954 (t, J=7.6 Hz, Ar-H, 4H), 7.567-7.532 (t, J=7.0 Hz, Ar-H, 8H), 7.387-7.356 (d, J=12.4 Hz, Ar-H, 3H), 7.175-7.134 (d, J=16.4 Hz, Ar-H, 1H), 7.049 (s, Ar-H, 1H), 6.964-6.943 (d, J=8.4 Hz, -CH=CH-, 2H), 3.766 (s, -OCH<sub>3</sub>, 3H). <sup>13</sup>C-NMR (151 MHz, DMSO-*d*<sub>6</sub>) δ (ppm): 161.718, 159.556, 153.181, 139.773, 136.428, 132.029, 130.003, 129.602, 129.300, 129.249, 129.232, 129.177, 128.342, 125.957, 117.071, 114.667, 112.186, 55.607. IR(cm<sup>-1</sup>): 2860.2, 2829.9, 1600.3, 1569.2, 1500.8, 1463.0, 1240.1, 1180.3, 1029.0, 970.9, 830.6, 770.5. HRMS (ESI) m/z: calcd for C<sub>29</sub>H<sub>24</sub>N<sub>2</sub>O [M+H]<sup>+</sup> 417.1889, found 417.1892. Elementary analysis, Anal. Calcd for C<sub>29</sub>H<sub>24</sub>N<sub>2</sub>O: C, 83.63; H, 5.81; N, 6.73. Found: C, 83.70; H, 5.73; N,

---

6.80.

**Target C11, 2-((4'-Methoxyl-diphenylethylene-2''-ylimino)methyl)phenol**

The synthesis of target **C11** followed essentially the same procedure as described that of target **C1**, in which 1, 2-diamine-4-styrylbenzene was replaced by 2-(4'-methoxy-cinnamenyl)-aminyl-benzene in the synthetic process. Product material was faint yellow solid (yield, 75%, m.p., 110.3-111.0 °C). <sup>1</sup>H-NMR (500 MHz, DMSO-*d*<sub>6</sub>) δ (ppm): 13.160 (s, -OH, 1H), 8.924 (s, N=CH, 1H), 7.814-7.799 (d, *J*=7.5 Hz, Ar-H, 1H), 7.726-7.708 (m, Ar-H, 1H), 7.503-7.486 (m, Ar-H, 2H), 7.472-7.437 (m, Ar-H, 1H), 7.406-7.367 (m, Ar-H, 3H), 7.356-319 (m, Ar-H, 4H), 7.238-7.206 (d, *J*=16.0 Hz, CH=CH, 1H), 7.037-6.972 (m, CH=CH, 1H), 3.778 (s, -OCH<sub>3</sub>, 3H). <sup>13</sup>C-NMR (125 MHz, DMSO-*d*<sub>6</sub>) δ (ppm): 163.457, 160.315, 159.173, 145.886, 131.317, 130.102, 129.720, 128.441, 127.738, 127.056, 125.677, 121.259, 119.619, 119.248, 119.059, 116.641, 114.331, 55.157. IR (cm<sup>-1</sup>): 3423.0, 3058.0, 3032.7, 3004.6, 2957.2, 2933.6, 2908.3, 2835.2, 1607.0, 1590.2, 1575.5, 1559.8, 1512.0, 1475.6, 1451.2, 1283.6, 1248.1, 961.5, 908.5, 823.5, 755.2. HRMS (ESI) *m/z*: calcd for C<sub>22</sub>H<sub>19</sub>NO<sub>2</sub> [M+H]<sup>+</sup> 330.1432, found 330.1425. Elementary analysis, Anal. Calcd for C<sub>22</sub>H<sub>19</sub>NO<sub>2</sub>: C, 80.23; H, 5.81; N, 4.25. Found: C, 80.34; H, 5.73; N, 4.36.

**Target C12, 3-((4'-Methoxyl-diphenylethylene-2''-ylimino)methyl)phenol**

The synthesis of target **C12** followed essentially the same procedure as described that of target **C11**, in which 2-(4'-methoxy-cinnamenyl)-aminyl-benzene was replaced by 3-(4'-Methoxy-cinnamenyl)-aminyl-benzene in the synthetic process. Product material was faint yellow solid (yield, 60.3%, m.p., 147.0-148.8 °C). <sup>1</sup>H-NMR (400 MHz, DMSO-*d*<sub>6</sub>) δ (ppm): 13.094 (s, -OH, 1H), 9.002 (s, CH=N, 1H), 7.669-7.650 (d, *J*=7.6 Hz, Ar-H, 1H), 7.616 (s, Ar-H, 1H), 7.557-7.535

---

(d,  $J=8.8$  Hz, CH=CH, 2H), 7.485-7.466 (d,  $J=7.6$  Hz, Ar-H, 1H), 7.443-7.404 (m, Ar-H, 2H), 7.291-7.260 (t,  $J=6.2$  Hz, Ar-H, 2H), 7.153-7.112 (d,  $J=16.4$  Hz, Ar-H, 1H), 7.000-6.937 (m, Ar-H, 4H), 3.764 (s, -OCH<sub>3</sub>, 3H). <sup>13</sup>C-NMR (151 MHz, DMSO-*d*<sub>6</sub>)  $\delta$  (ppm): 163.018, 160.754, 149.270, 146.997, 136.856, 133.637, 132.953, 130.407, 129.120, 128.748, 127.609, 125.957, 122.294, 120.500, 119.830, 119.587, 117.021, 112.227, 109.657, 55.949. IR(cm<sup>-1</sup>): 3433.4, 3065.6, 3052.8, 3021.5, 3000.9, 2974.1, 2845.9, 1629.7, 1591.1, 1573.3, 1514.1, 1483.7, 1453.9, 1411.5, 1354.7, 1319.3, 1286.4, 1255.7, 1221.1, 1199.4, 1151.3, 1135.6, 1101.3, 1021.6, 963.1, 916.1, 845.3, 821.0, 803.4, 759.2. HRMS (ESI) *m/z*: calcd for C<sub>22</sub>H<sub>19</sub>NO<sub>2</sub> [M+H]<sup>+</sup> 330.1271, found 330.1288. Elementary analysis, Anal. Calcd for C<sub>22</sub>H<sub>19</sub>NO<sub>2</sub>: C, 80.23; H, 5.81; N, 4.25. Found: C, 80.34; H, 5.73; N, 4.36.

**Target C13, 2-((4'-Methoxyl-diphenylethylene-4''-ylimino)methyl)phenol**

The synthesis of target **C13** followed essentially the same procedure as described that of target **C11**, in which salicylaldehyde was replaced by benzaldehyde in the synthetic process. Product material was faint yellow solid (yield, 75%, m.p., 207.4-209.3°C). <sup>1</sup>H-NMR (400 MHz, DMSO-*d*<sub>6</sub>)  $\delta$  (ppm): 8.655 (s, -N=CH, 1H), 7.930-7.907 (m, Ar-H, 2H), 7.602- 7.581 (d,  $J=8.4$  Hz, Ar-H, 2H), 7.533-7.497 (t,  $J=7.2$  Hz, Ar-H, 5H), 7.283-7.262 (d,  $J=8.4$  Hz, CH=CH, 2H), 7.207 - 7.074 (m, Ar-H, 2H), 6.937-6.915 (d,  $J=8.8$  Hz, Ar-H, 2H), 3.750 (s, -OCH<sub>3</sub>, 3H). <sup>13</sup>C-NMR (151 MHz, DMSO-*d*<sub>6</sub>)  $\delta$  (ppm): 163.029, 160.741, 159.742, 147.016, 136.832, 133.636, 132.947, 130.870, 130.094, 128.737, 128.273, 128.137, 127.629, 127.436, 125.811, 122.264, 121.883, 119.822, 119.585, 117.016, 114.642, 55.604. IR (cm<sup>-1</sup>): 3448.2, 3057.9, 3021.5, 2957.2, 2934.6, 2909.3, 2838.7, 1621.5, 1604.3, 1571.3, 1490.2, 1456.6, 1407.7, 1384.5, 1363.5, 1283.1, 1266.6, 1254.4, 1190.2, 1178.0, 1149.5, 1110.7, 1031.0, 969.8, 956.5, 911.3, 838.7, 749.4, 741.2. HRMS

---

(ESI) m/z: calcd for C<sub>22</sub>H<sub>19</sub>NO<sub>2</sub> [M+H]<sup>+</sup> 330.1469, found 330.1453. Elementary analysis, Anal.

Calcd for C<sub>22</sub>H<sub>19</sub>NO<sub>2</sub>: C, 80.23; H, 5.81; N, 4.25. Found: C, 80.31; H, 5.72; N, 4.33.

**Target C14, N-benzylidene-2-(4-methoxystyryl)aniline**

The synthesis of target **C14** followed essentially the same procedure as described that of target **C11**, in which salicylaldehyde was replaced by benzaldehyde in the synthetic process. Product material was faint yellow solid (yield, 65%, m.p., 201.0-202.0 °C). <sup>1</sup>H-NMR (400 MHz, DMSO-*d*<sub>6</sub>) δ (ppm): 8.655 (s, N=CH, 1H), 7.930-7.907 (m, Ar-H, 2H), 7.602-7.581 (d, *J*=8.4 Hz, Ar-H, 2H), 7.533-7.497 (t, *J*=7.2 Hz, Ar-H, 5H), 7.283 -7.262 (d, *J*=8.4 Hz, CH=CH, 2H), 7.207-7.074 (m, Ar-H, 2H), 6.937-6.915 (d, *J*=8.8 Hz, Ar-H, 2H), 3.750 (s, -OCH<sub>3</sub>, 3H). <sup>13</sup>C-NMR (151 MHz, DMSO-*d*<sub>6</sub>) δ (ppm): 160.860, 159.410, 149.482, 136.598, 131.984, 131.426, 130.452, 129.476, 129.363, 129.172, 128.653, 128.089, 126.529, 125.834, 122.702, 119.117, 114.699, 55.565. FT-IR (cm<sup>-1</sup>): 3447.8, 3057.9, 3038.3, 2956.8, 2937.4, 2881.3, 2838.4, 1623.6, 1604.7, 1574.6, 1513.4, 1466.3, 1448.5, 1420.9, 1364.8, 1306.2, 1286.9, 1253.7, 1197.9, 1178.0, 1110.4, 1030.8, 965.1, 887.9, 837.5, 757.4, 730.8, 688.8. HRMS (ESI) m/z: calcd for C<sub>22</sub>H<sub>19</sub>NO [M+H]<sup>+</sup> 314.1544, found 314.1539. Elementary analysis, Anal. Calcd for C<sub>22</sub>H<sub>19</sub>NO: C, 84.33; H, 6.10; N, 4.47. Found: C, 84.43; H, 6.02; N, 4.55.

**Target C15, N-benzylidene-3-(4-methoxystyryl)aniline**

The synthesis of target **C15** followed essentially the same procedure as described that of target **C12**, in which salicylaldehyde was replaced by benzaldehyde in the synthetic process. Product material was faint yellow solid (yield, 43%, m.p. 138.3-139.5°C). <sup>1</sup>H-NMR (400 MHz, DMSO-*d*<sub>6</sub>) δ (ppm): 8.657 (s, CH=N, 1H), 7.954-7.931 (m, Ar-H, 2H), 7.548-7.519 (m, Ar-H, 5H), 7.452-7.375 (m, Ar-H, 3H), 7.296-7.256 (d, *J*=16Hz, Ar-H, 1H), 7.134-7.093 (t, *J*=8.2 Hz, Ar-H,

---

2H), 6.948-6.927 (d,  $J=8.4$  Hz, CH=CH, 2H), 3.757 (s, -OCH<sub>3</sub>, 3H). <sup>13</sup>C-NMR (151 MHz, DMSO-*d*<sub>6</sub>)  $\delta$  (ppm): 160.642, 150.949, 137.551, 136.509, 135.507, 131.911, 129.266, 129.143, 129.116, 128.450, 128.339, 128.011, 127.832, 126.869, 122.014, 56.136. FT-IR (cm<sup>-1</sup>): 3437.8, 3034.3, 3026.0, 2972.1, 2933.1, 1611.4, 1583.7, 1572.1, 1545.1, 1494.8, 1446.9, 1451.3, 1269.2, 961.7, 904.2, 852.9, 757.1, 692.3. HRMS (ESI)  $m/z$ : calcd for C<sub>22</sub>H<sub>19</sub>NO [M+H]<sup>+</sup> 314.1563, found 314.1570. Elementary analysis, Anal. Calcd for C<sub>22</sub>H<sub>19</sub>NO: C, 84.33; H, 6.10; N, 4.47. Found: C, 84.42; H, 6.02; N, 4.52

#### **Target C16, Benzylidene-(4-(2-(4-Methoxy-phenyl)-vinyl)-phenyl)-amine**

The synthesis of target **C16** followed essentially the same procedure as described that of target **C13**, in which salicylaldehyde was replaced by benzaldehyde in the synthetic process. Product material was faint yellow solid (yield, 56%, m.p., 201.0-202.0 °C). <sup>1</sup>H-NMR (400 MHz, DMSO-*d*<sub>6</sub>)  $\delta$  (ppm): 8.655 (s, N=CH, 1H), 7.930-7.907 (m, Ar-H, 2H), 7.602-7.581(d,  $J=8.4$  Hz, Ar-H, 2H), 7.533-7.497(t,  $J=7.2$ Hz, Ar-H, 5H), 7.283-7.262 (d,  $J=8.4$  Hz, CH=CH, 2H), 7.207-7.074 (m, Ar-H, 2H), 6.937-6.915 (d,  $J=8.8$  Hz, Ar-H, 2H), 3.750 (s, -OCH<sub>3</sub>, 3H). <sup>13</sup>C-NMR (151 MHz, DMSO-*d*<sub>6</sub>)  $\delta$  (ppm): 160.380, 159.377, 150.484, 136.544, 135.927, 131.854, 130.195, 129.257, 129.075, 128.183, 128.154, 127.460, 127.329, 126.035, 122.001, 114.623, 55.596. FT-IR (cm<sup>-1</sup>): 3447.7, 3063.8, 3033.6, 3021.2, 3002.3, 2957.5, 2877.3, 2836.2, 2054.2, 2006.5, 1936.4, 1890.3, 1628.2, 1602.3, 1578.3, 1508.8, 1473.8, 1450.0, 1440.2, 1367.1, 1328.9, 1307.7, 1252.5, 1213.8, 1174.5, 1109.9, 1091.9, 1031.8, 978.6, 884.2, 865.2, 825.3, 761.7, 739.5, 688.0. HRMS (ESI)  $m/z$ : calcd for C<sub>22</sub>H<sub>19</sub>NO [M+H]<sup>+</sup> 314.1341, found 314.1337. Elementary analysis, Anal. Calcd for C<sub>22</sub>H<sub>19</sub>NO: C, 84.33; H, 6.10; N, 4.47. Found: C, 84.46; H, 6.02; N, 4.52.

#### **References and notes**



(1). G. Ding, Y. Lu, Y. L. Gong, L. Ma, Z. P. Luo, S. T. Zhang, F. Gao, H. R. Li, *Tetrahedron*, 2016, 72, 3040-3056.

#### 4. The characterization of the intermediates

##### Intermediate 1

$^1\text{H-NMR}$  ( $\text{DMSO-}d_6$ )

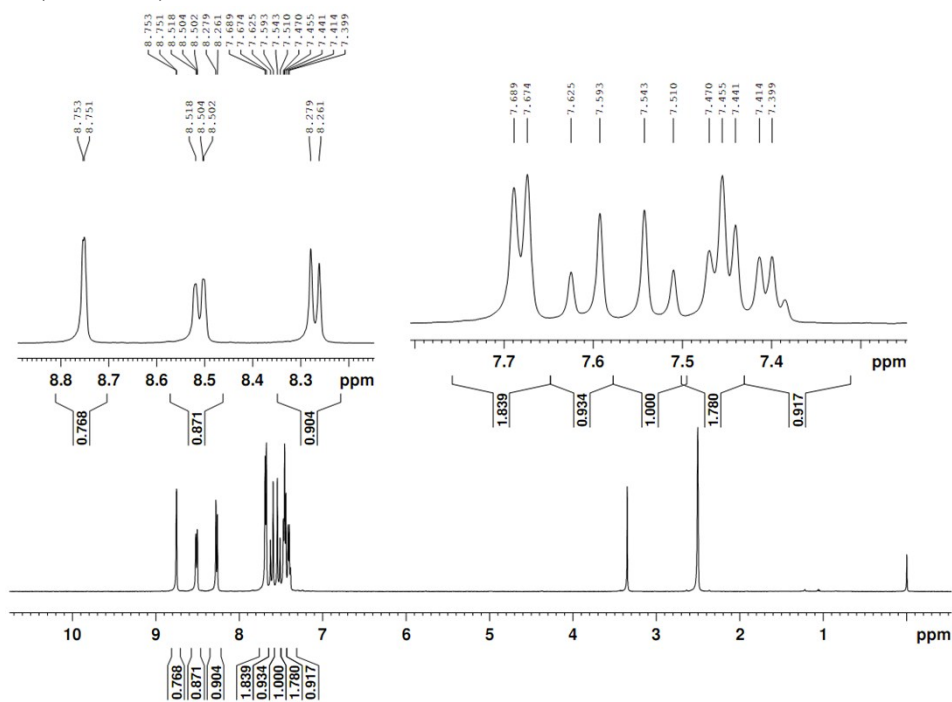

##### Intermediate 2

$^1\text{H-NMR}$  ( $\text{DMSO-}d_6$ )

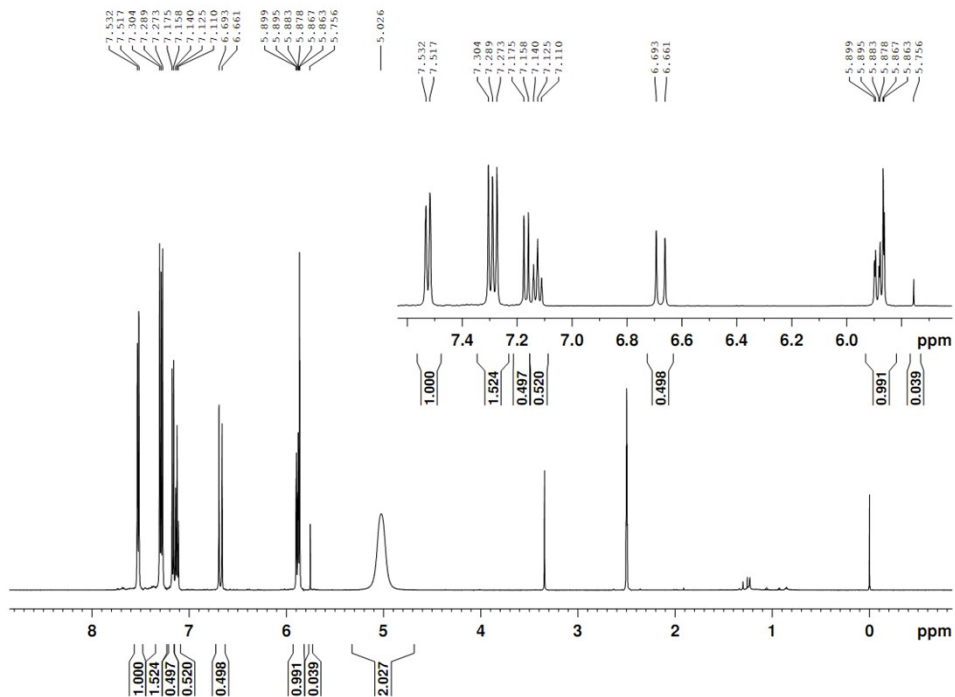

### Intermediate 3

<sup>1</sup>H-NMR (CDCl<sub>3</sub>)

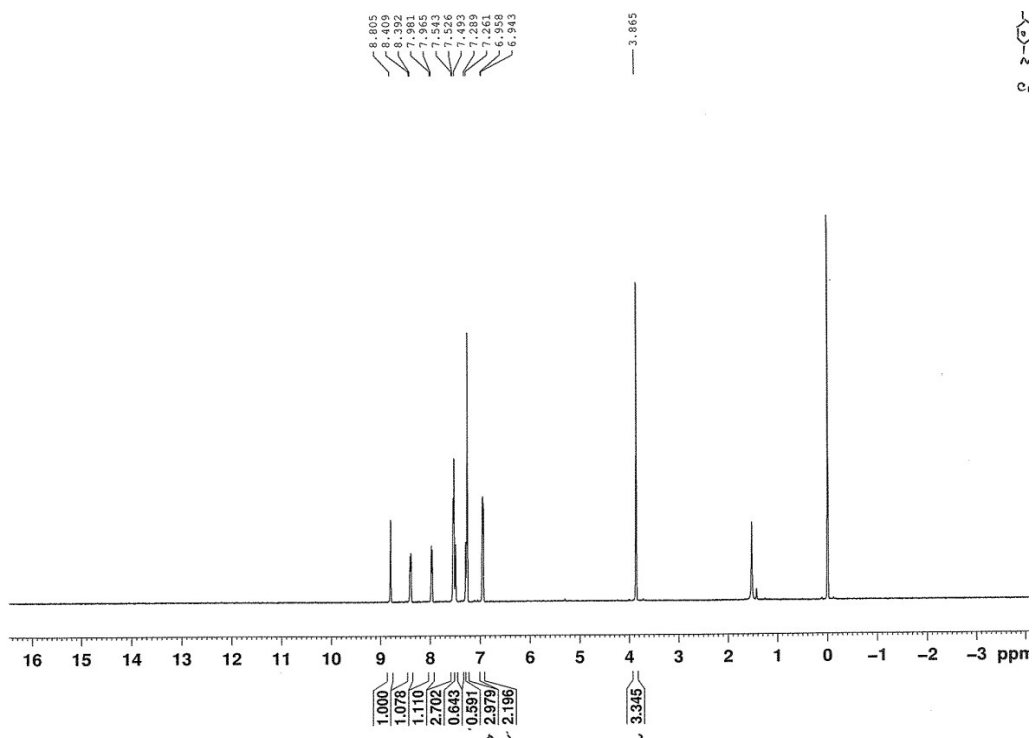

### Intermediate 4

<sup>1</sup>H-NMR (DMSO-*d*<sub>6</sub>)

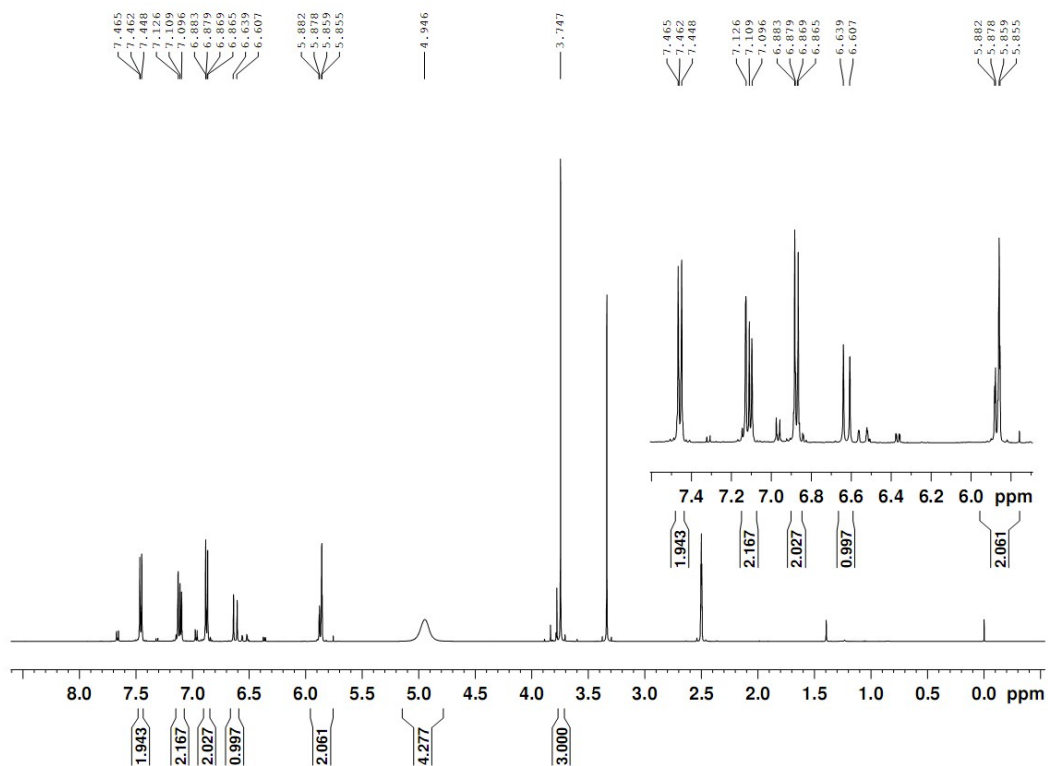

### Intermediate 5

<sup>1</sup>H-NMR (DMSO-*d*<sub>6</sub>)

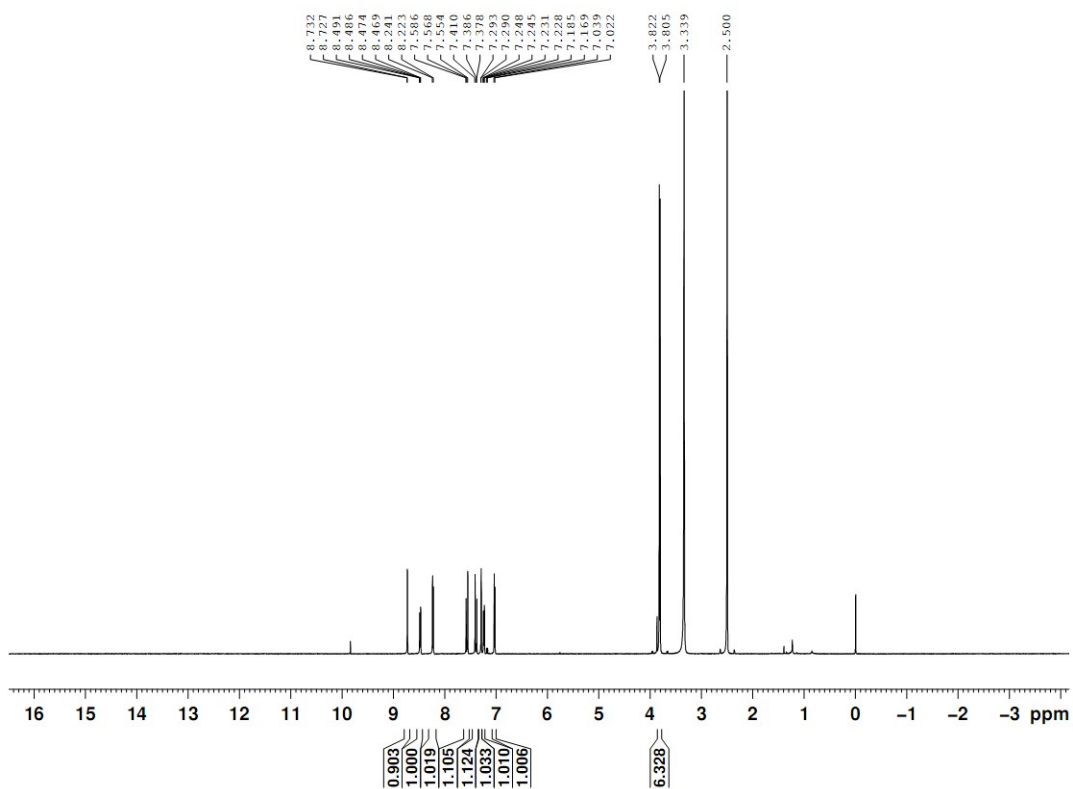

### Intermediate 6

$^1\text{H-NMR}$  ( $\text{CDCl}_3$ )

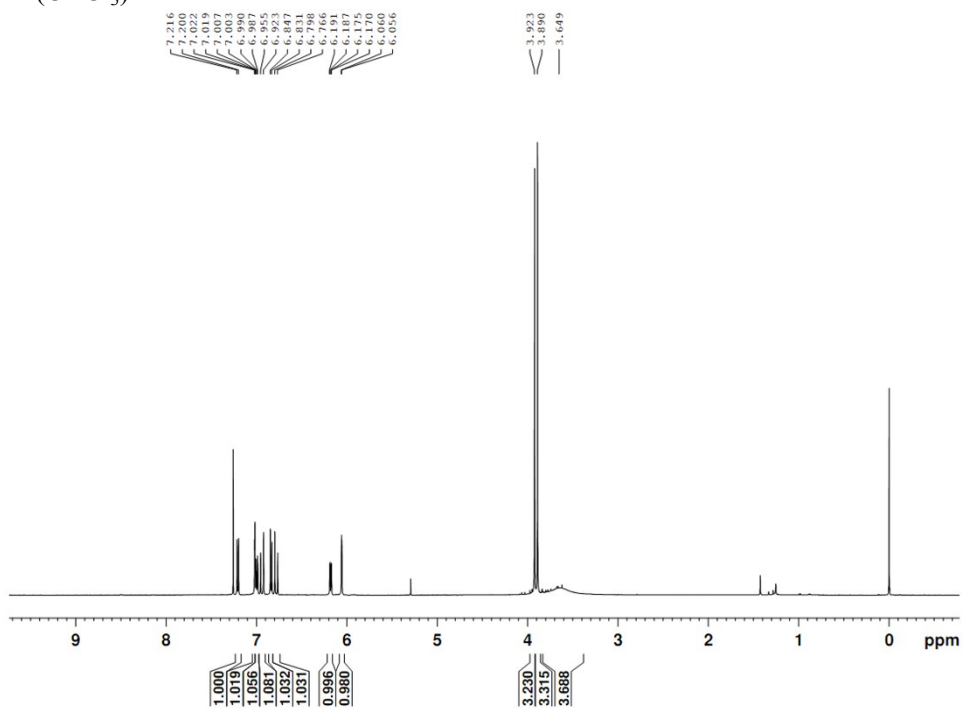

**Intermediate 7**

$^1\text{H-NMR}$  ( $\text{CDCl}_3$ )

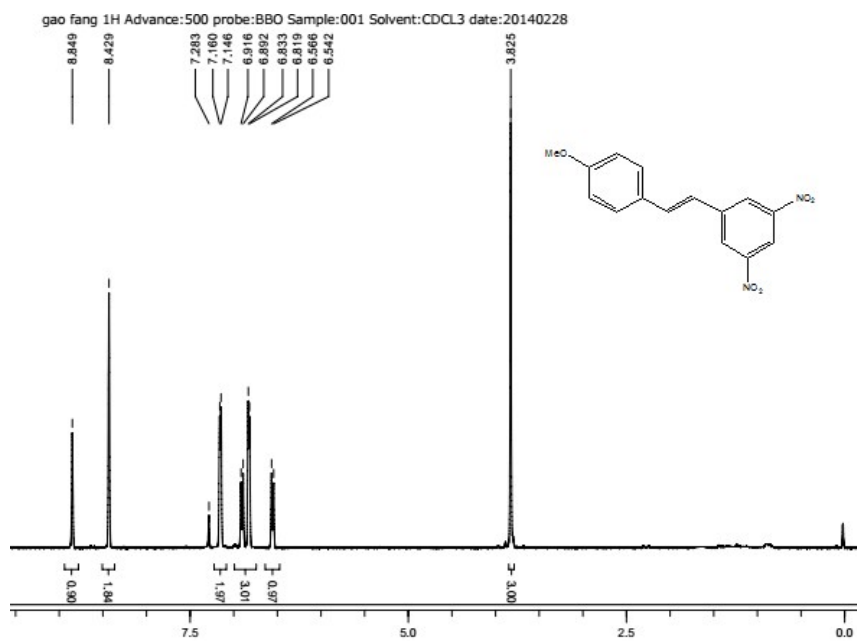

**Intermediate 8**

$^1\text{H-NMR}$  ( $\text{DMSO-}d_6$ )

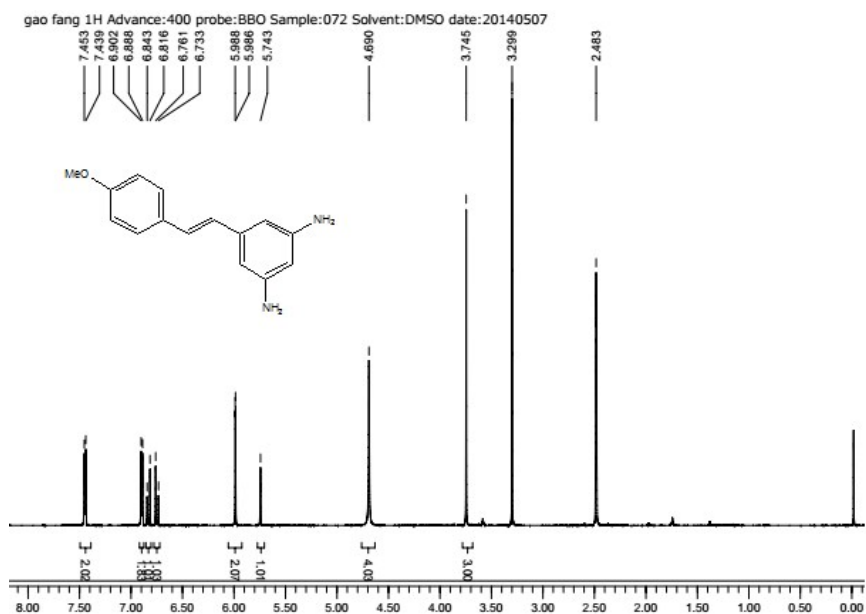

### Intermediate 9

<sup>1</sup>H-NMR (DMSO-*d*<sub>6</sub>)

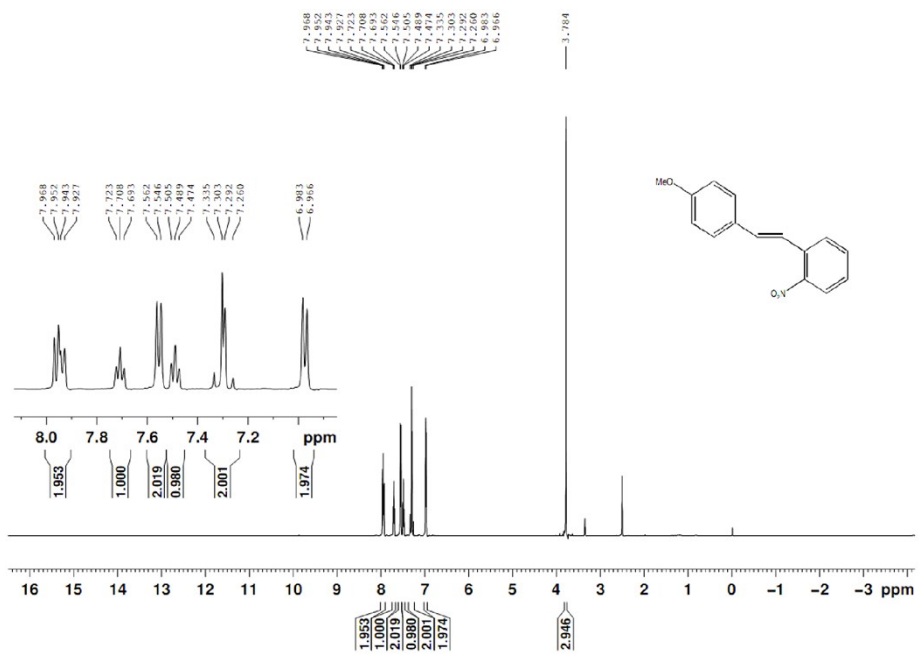

### Intermediate 10

<sup>1</sup>H-NMR (DMSO-*d*<sub>6</sub>)

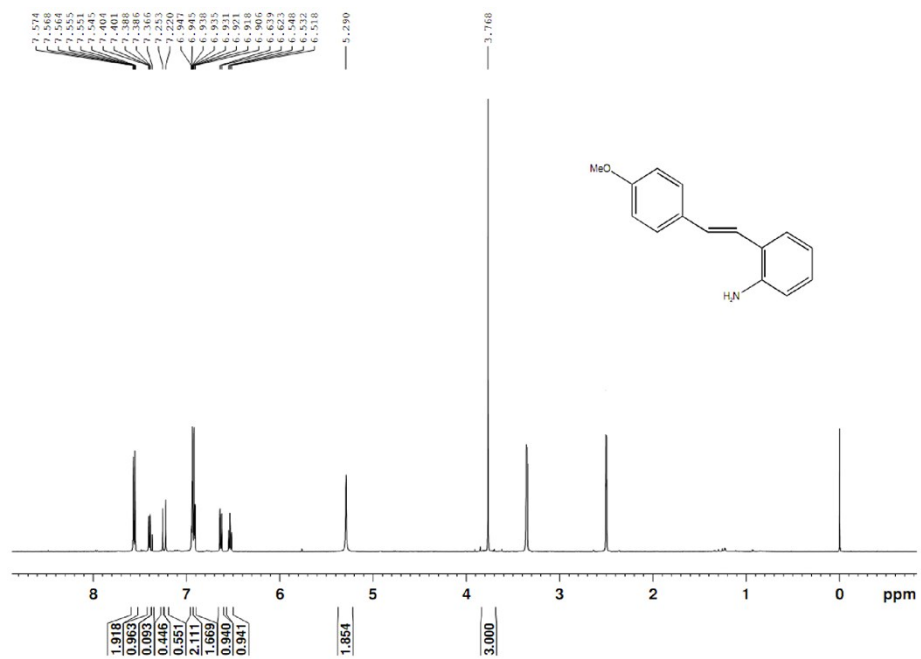

### Intermediate 11

$^1\text{H-NMR}$  ( $\text{DMSO-}d_6$ )

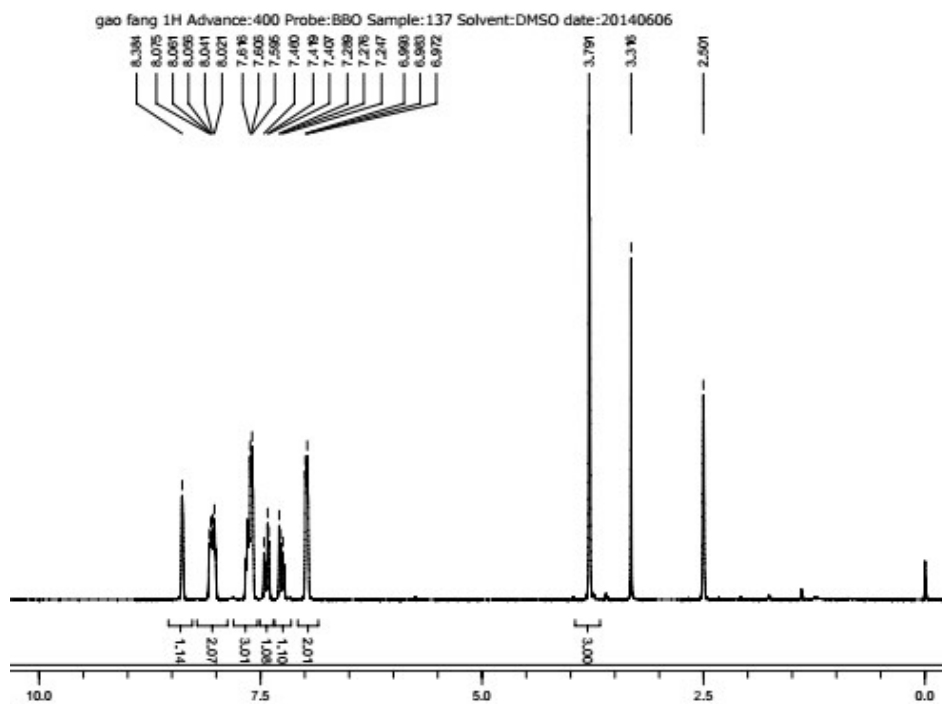

### Intermediate 12

$^1\text{H-NMR}$  ( $\text{DMSO-}d_6$ )

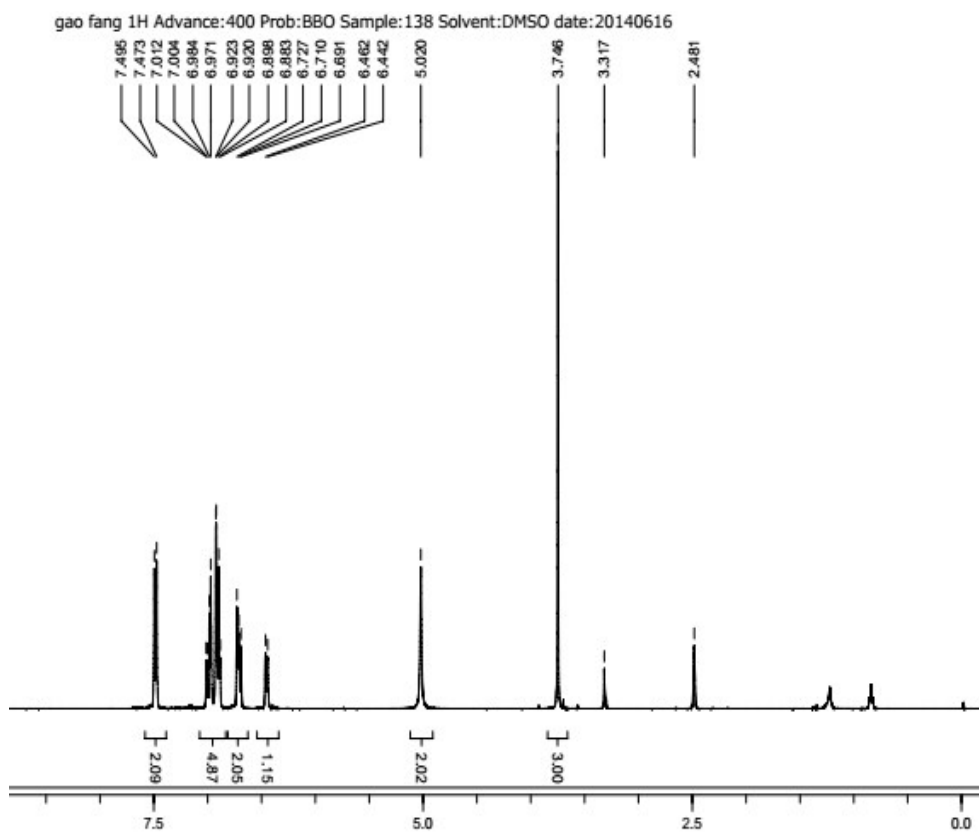

### Intermediate 13

$^1\text{H-NMR}$  ( $\text{CDCl}_3$ )

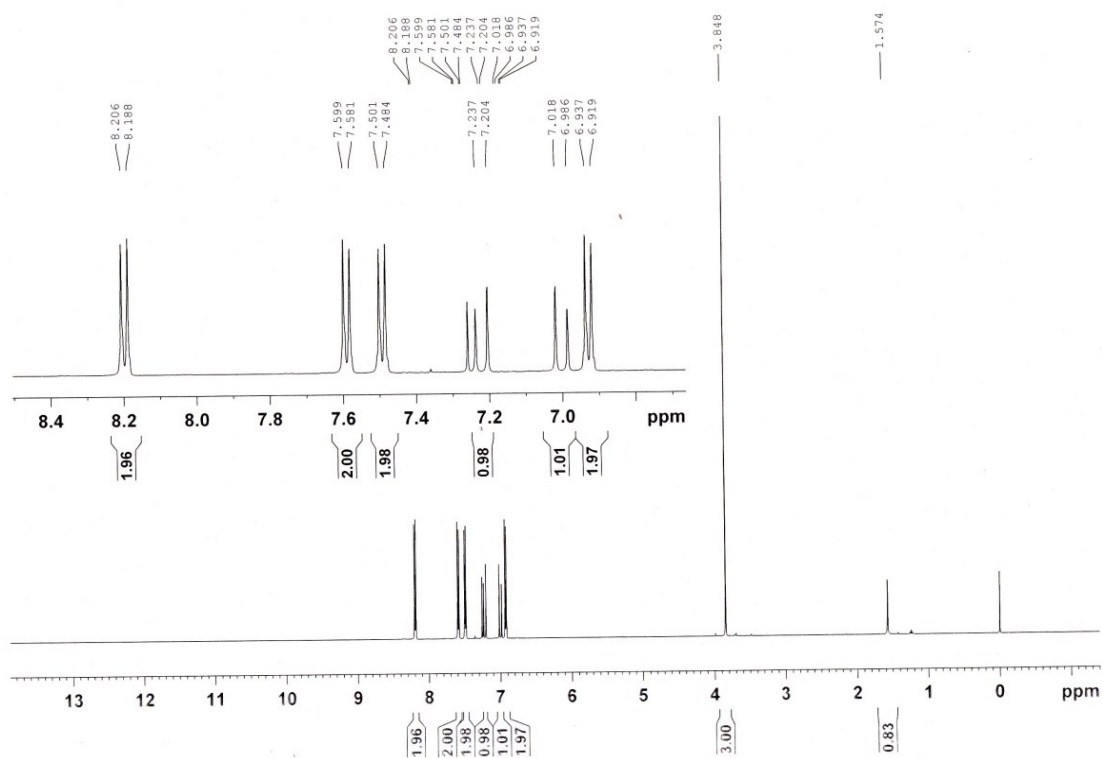

## 5. The characterization of the final compounds

### Target molecule C1

$^1\text{H-NMR}$  ( $\text{DMSO-}d_6$ )

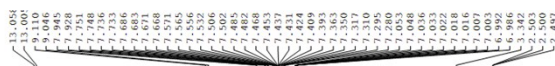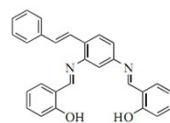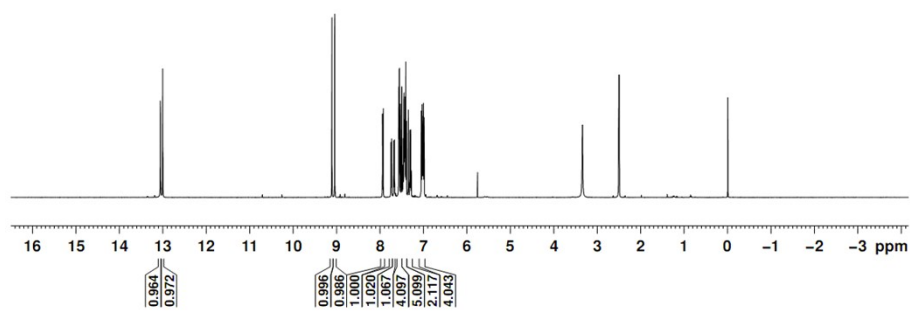

$^{13}\text{C-NMR}$  ( $\text{DMSO-}d_6$ )



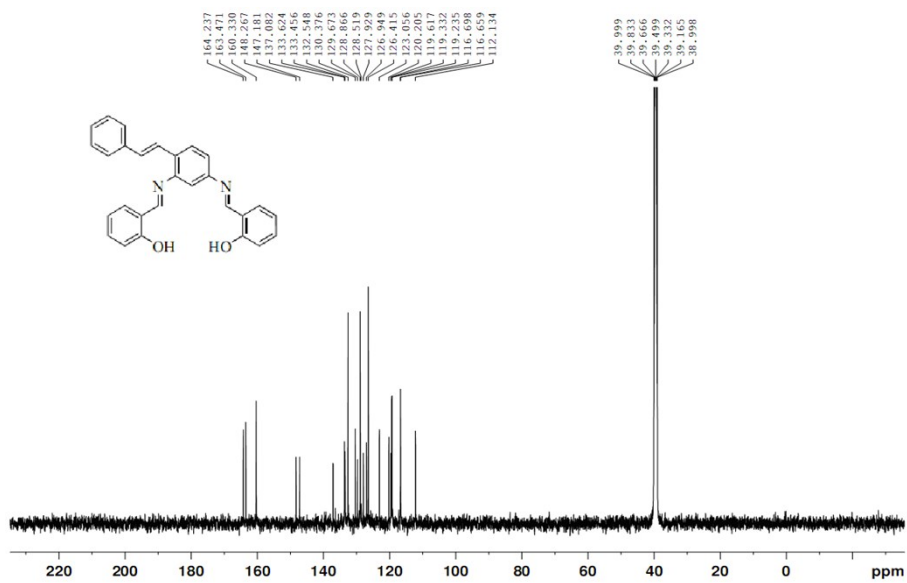

**Target molecule C2**

<sup>1</sup>H-NMR (DMSO-*d*<sub>6</sub>)

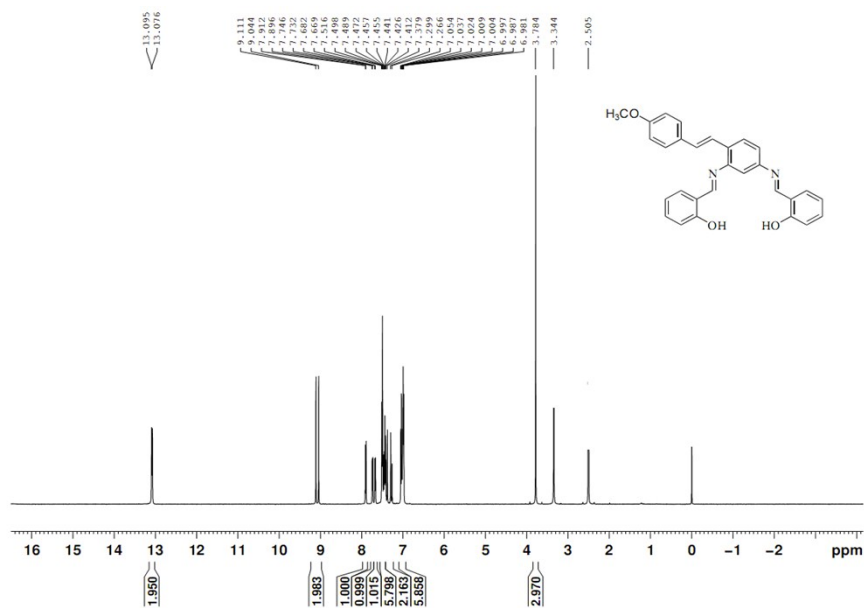

<sup>13</sup>C-NMR (DMSO-*d*<sub>6</sub>)

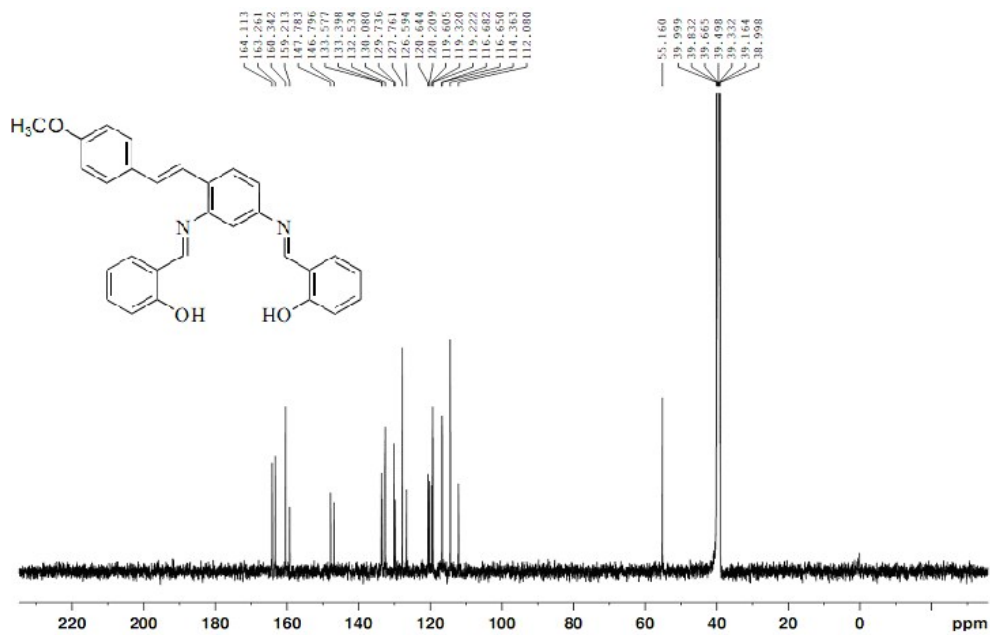

**Target molecule C3**

**<sup>1</sup>H-NMR (DMSO-*d*<sub>6</sub>)**

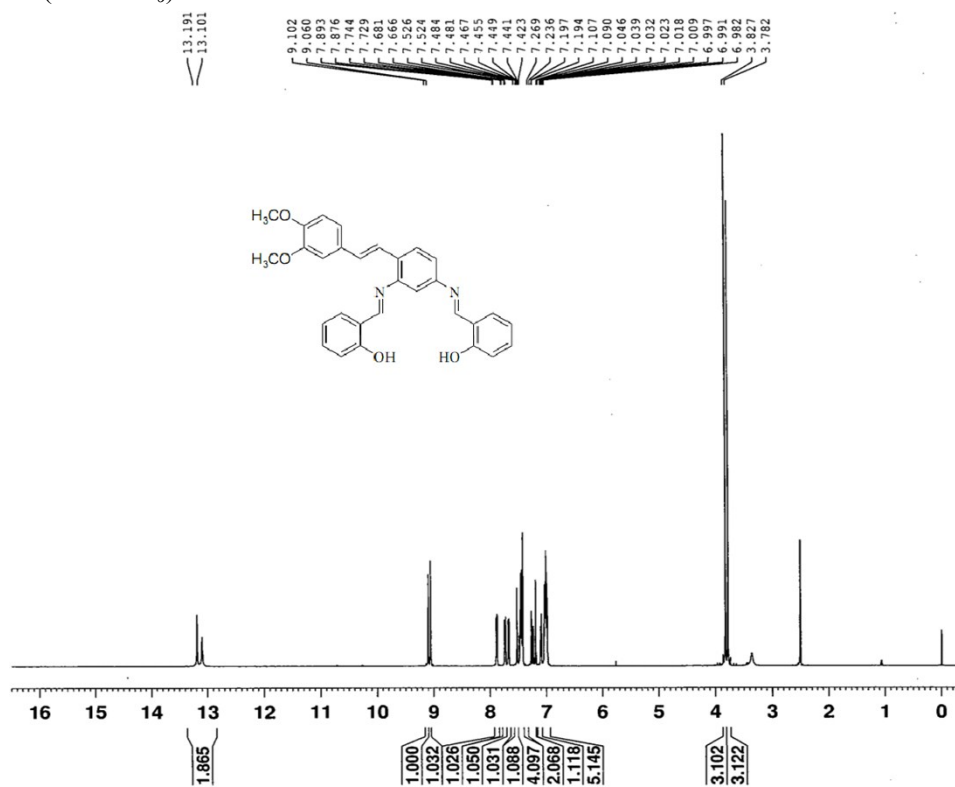

**<sup>13</sup>C-NMR (DMSO-*d*<sub>6</sub>)**



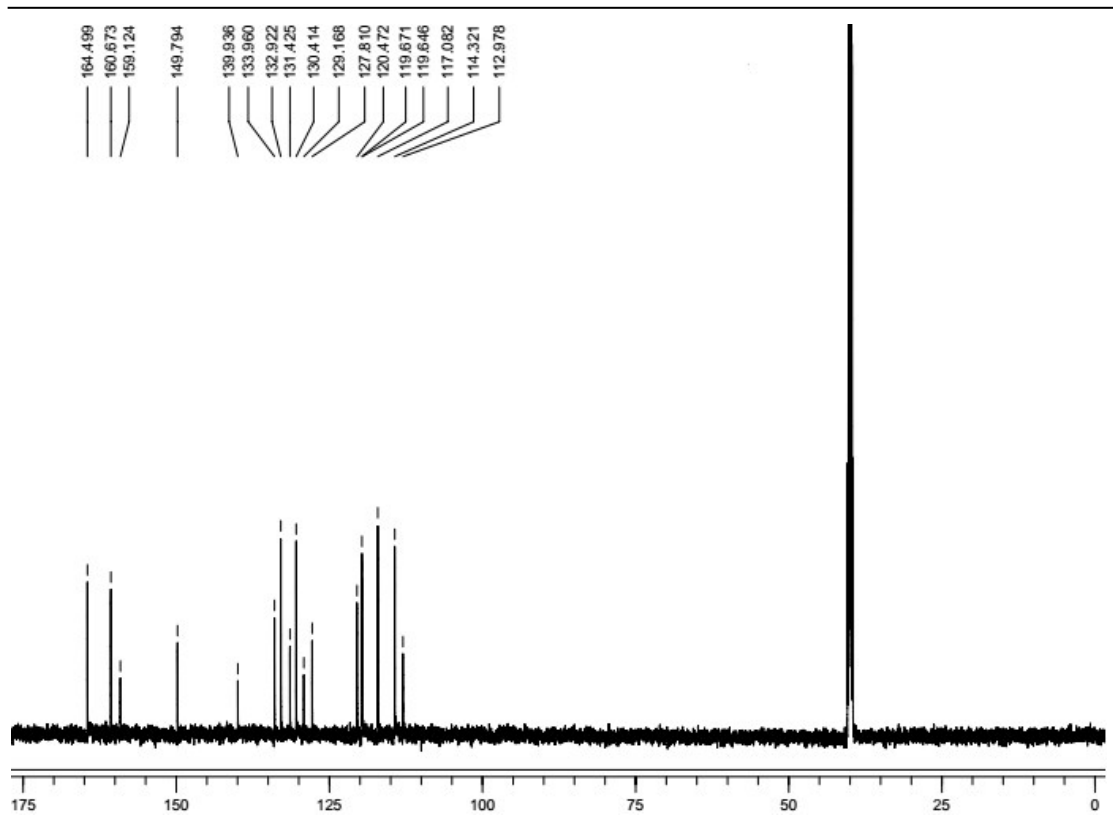

**Target molecule C5**

<sup>1</sup>H-NMR (DMSO-*d*<sub>6</sub>)

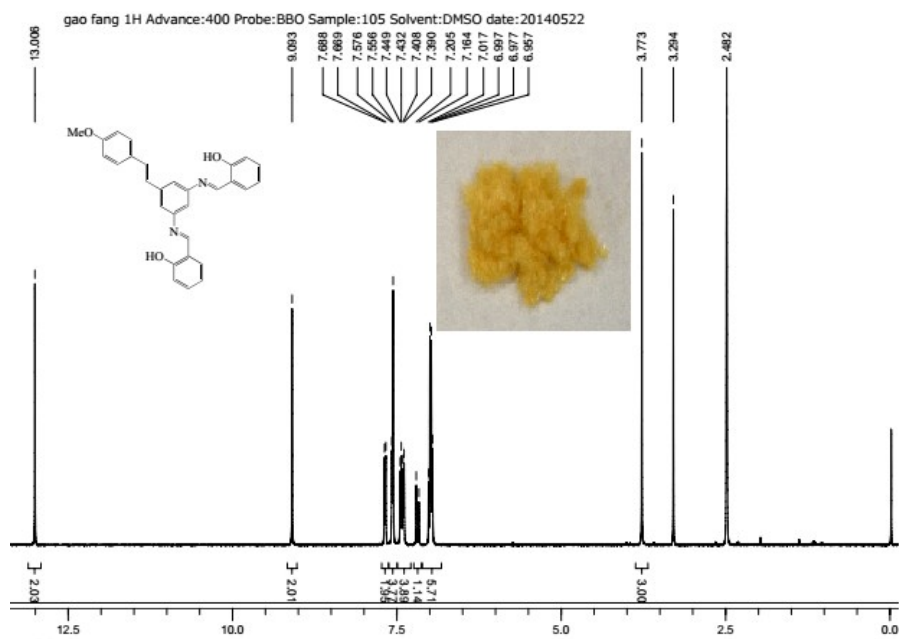

<sup>13</sup>C-NMR (DMSO-*d*<sub>6</sub>)

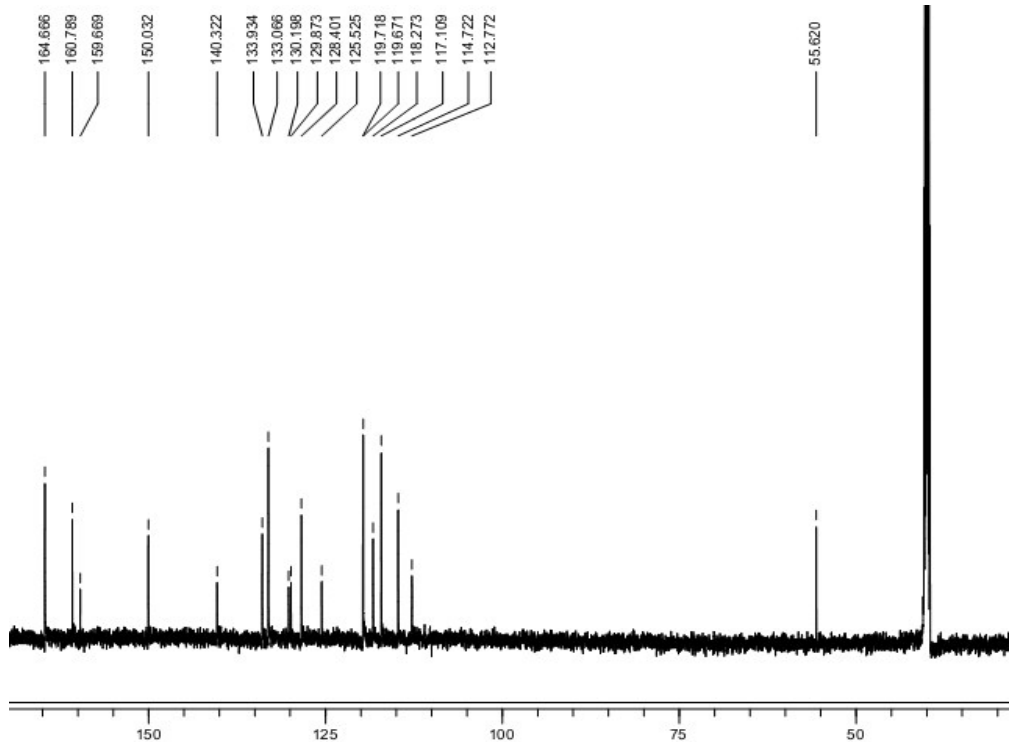

**Target molecule C6**

<sup>1</sup>H-NMR (DMSO-*d*<sub>6</sub>)

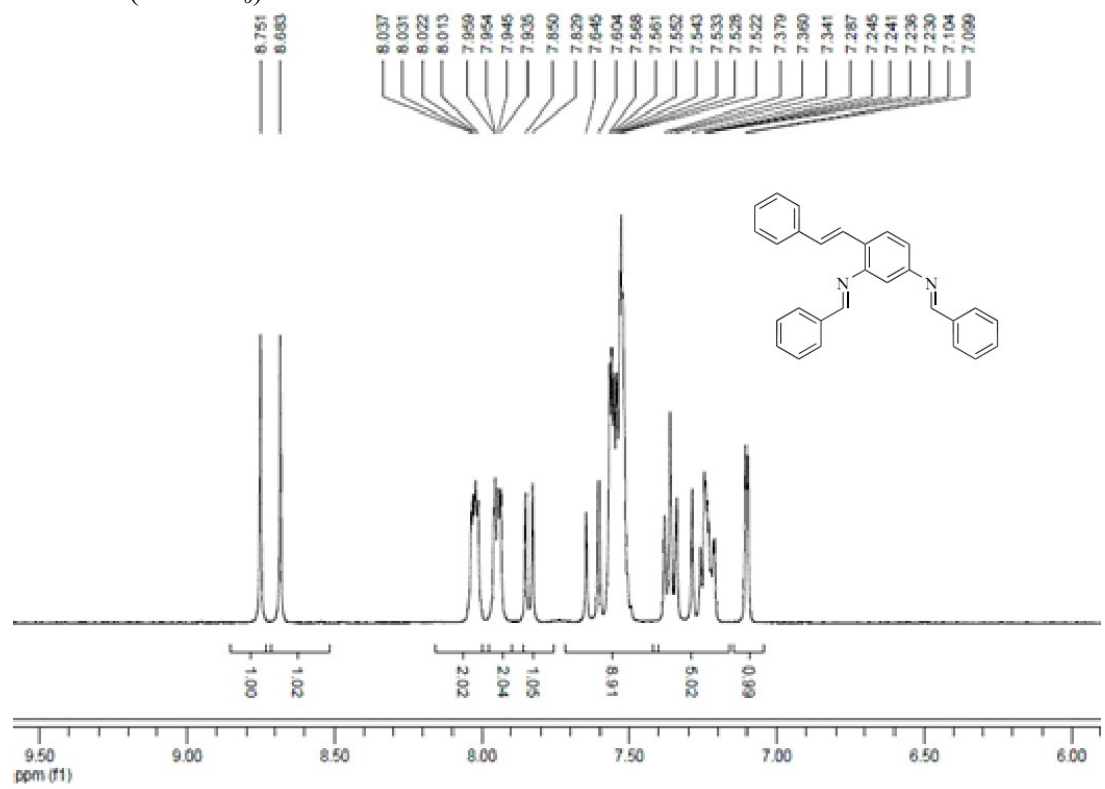

<sup>13</sup>C-NMR (DMSO-*d*<sub>6</sub>)

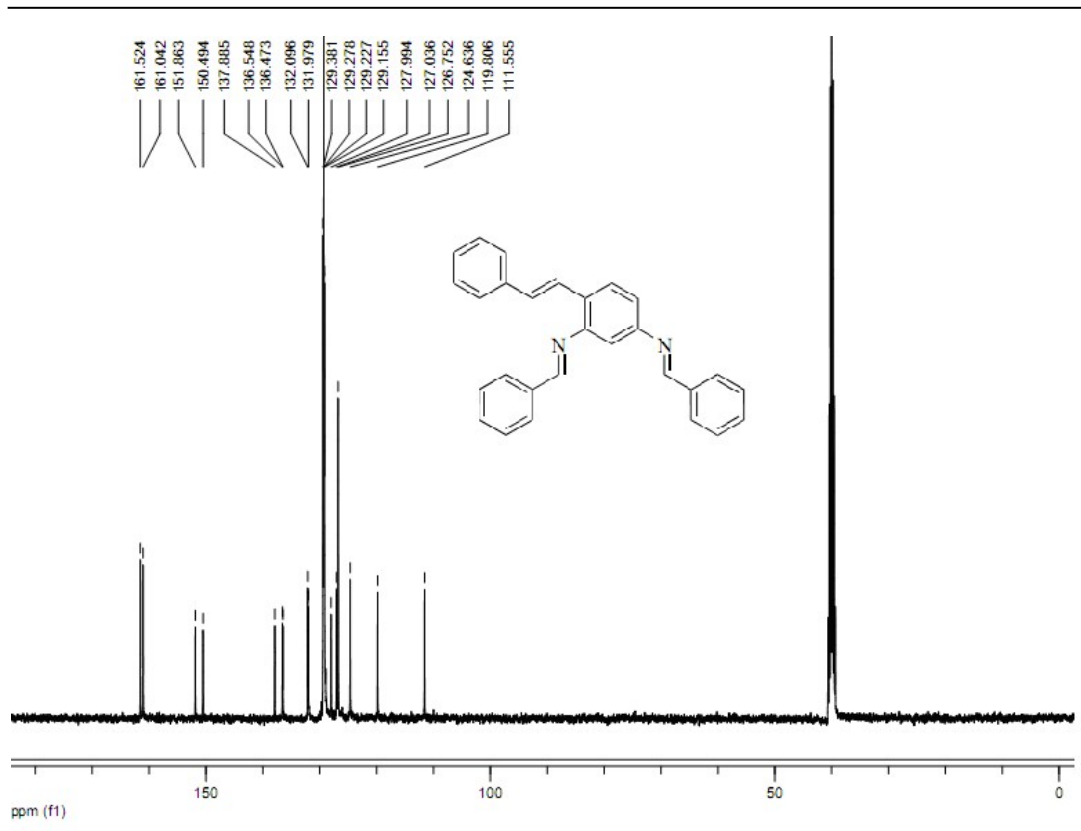

**Target molecule C7**

<sup>1</sup>H-NMR (DMSO-*d*<sub>6</sub>)

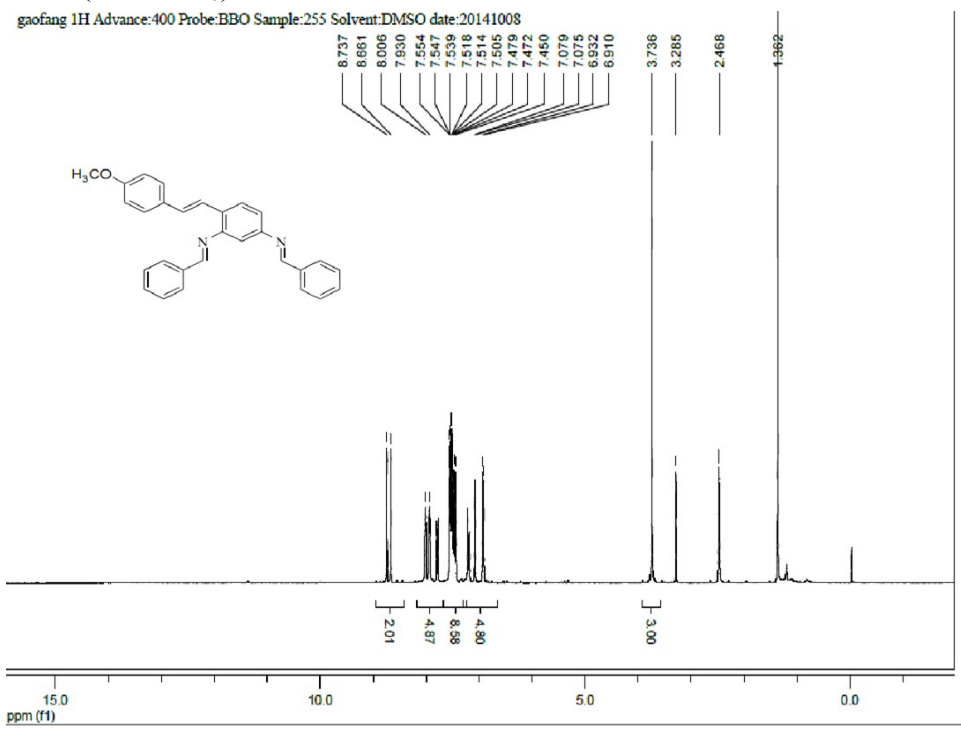

<sup>13</sup>C-NMR (DMSO-*d*<sub>6</sub>)

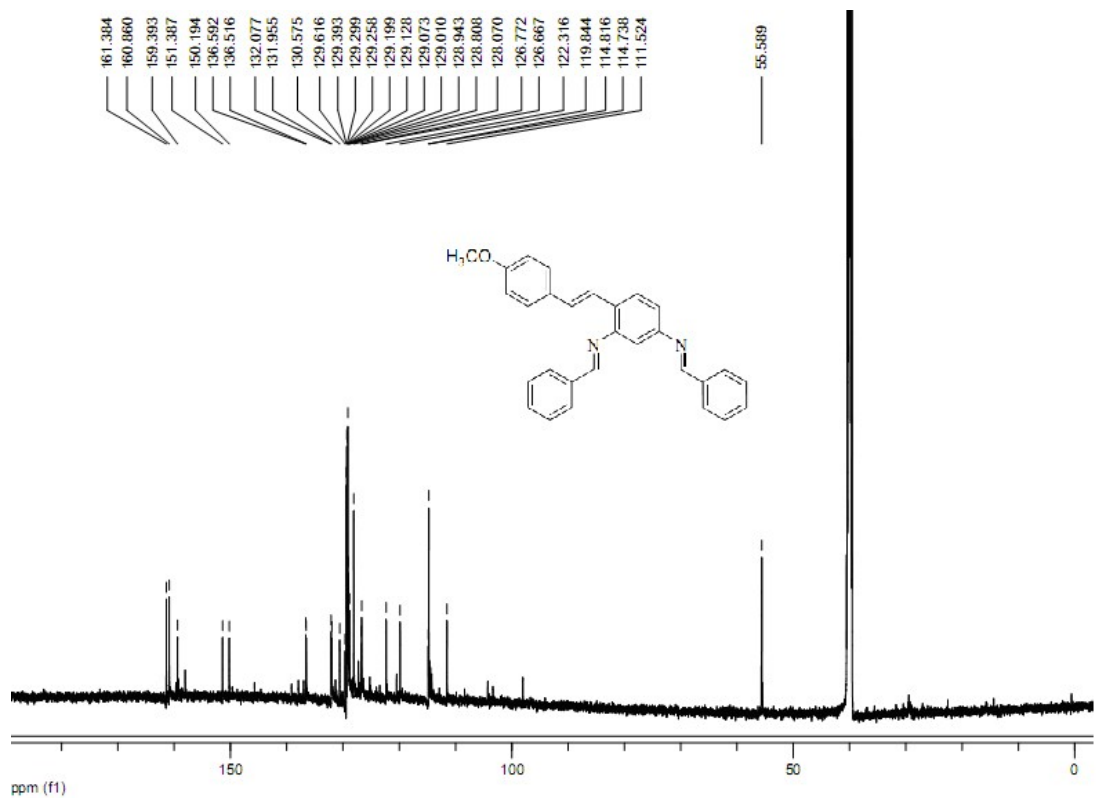

**Target molecule C8**

<sup>1</sup>H-NMR (DMSO-d<sub>6</sub>)

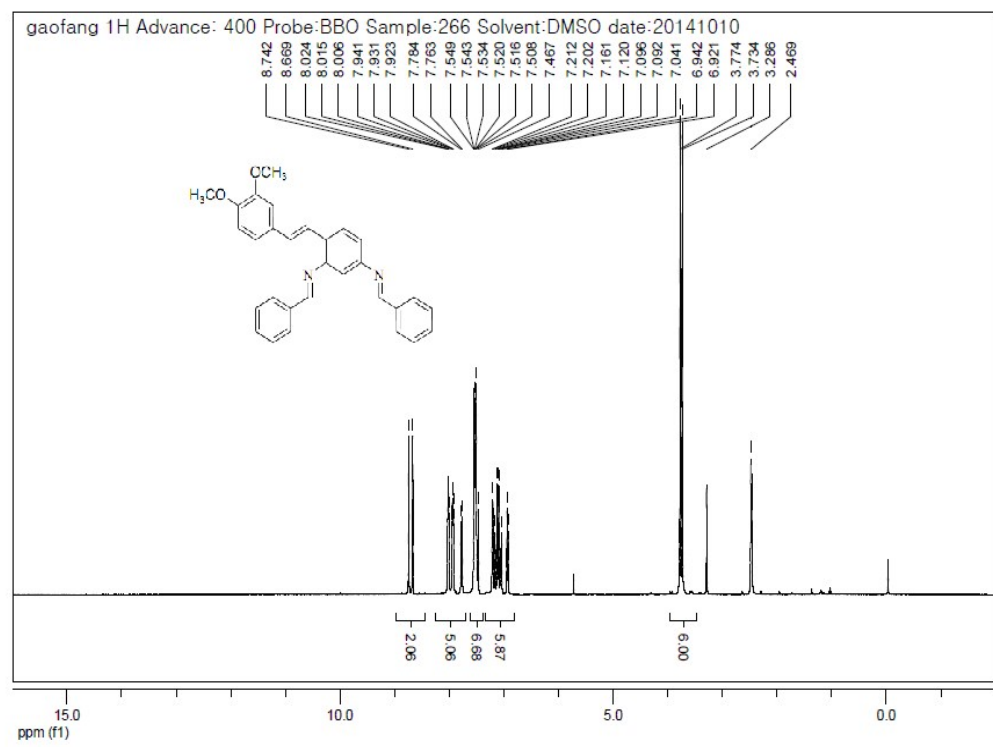

<sup>13</sup>C-NMR (DMSO-d<sub>6</sub>)

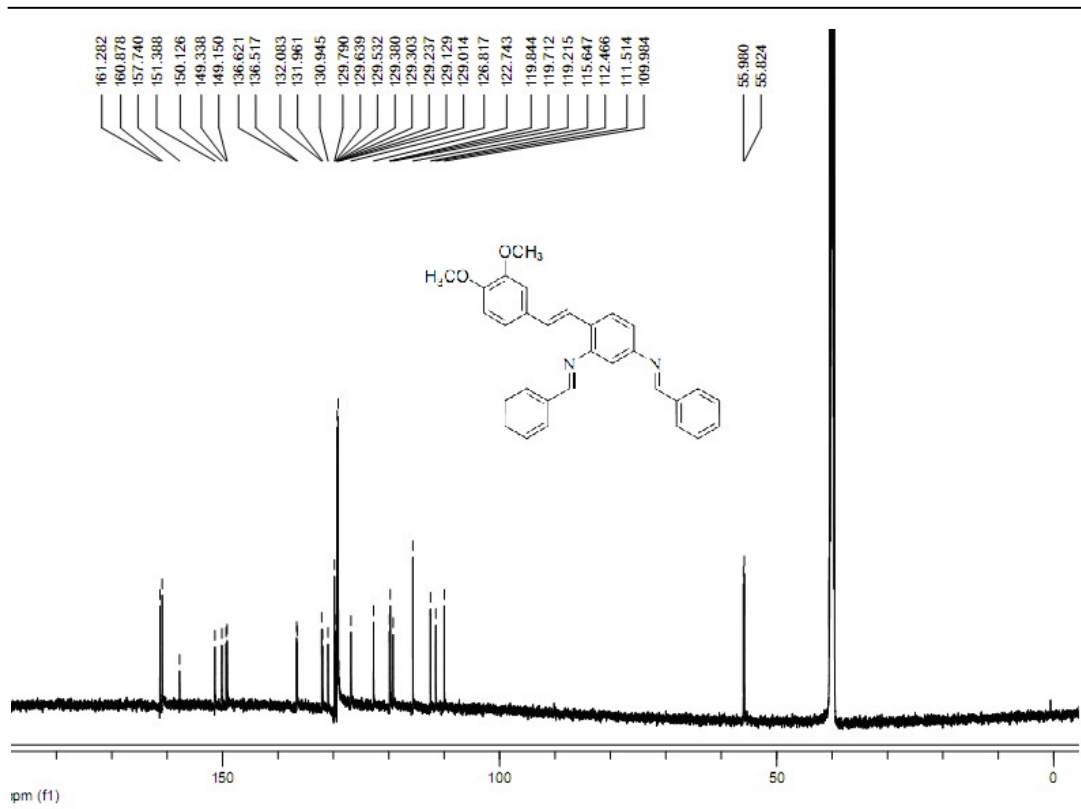

**Target molecule C9**

<sup>1</sup>H-NMR (DMSO-*d*<sub>6</sub>)

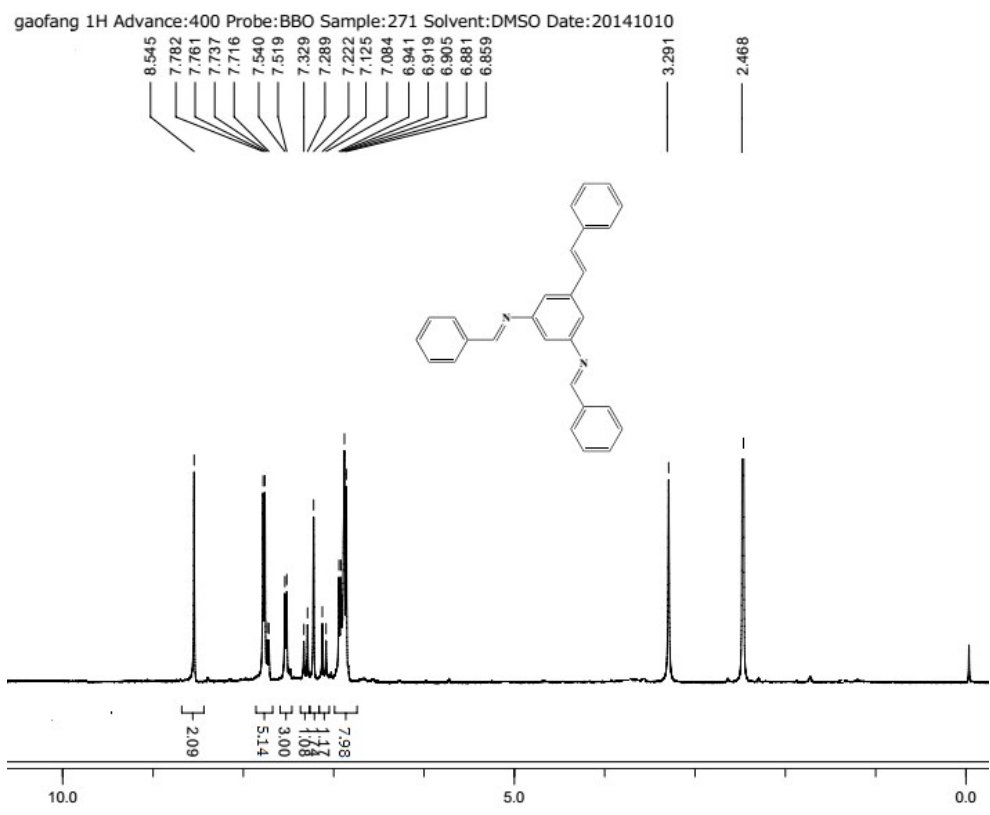

<sup>13</sup>C-NMR (DMSO-*d*<sub>6</sub>)



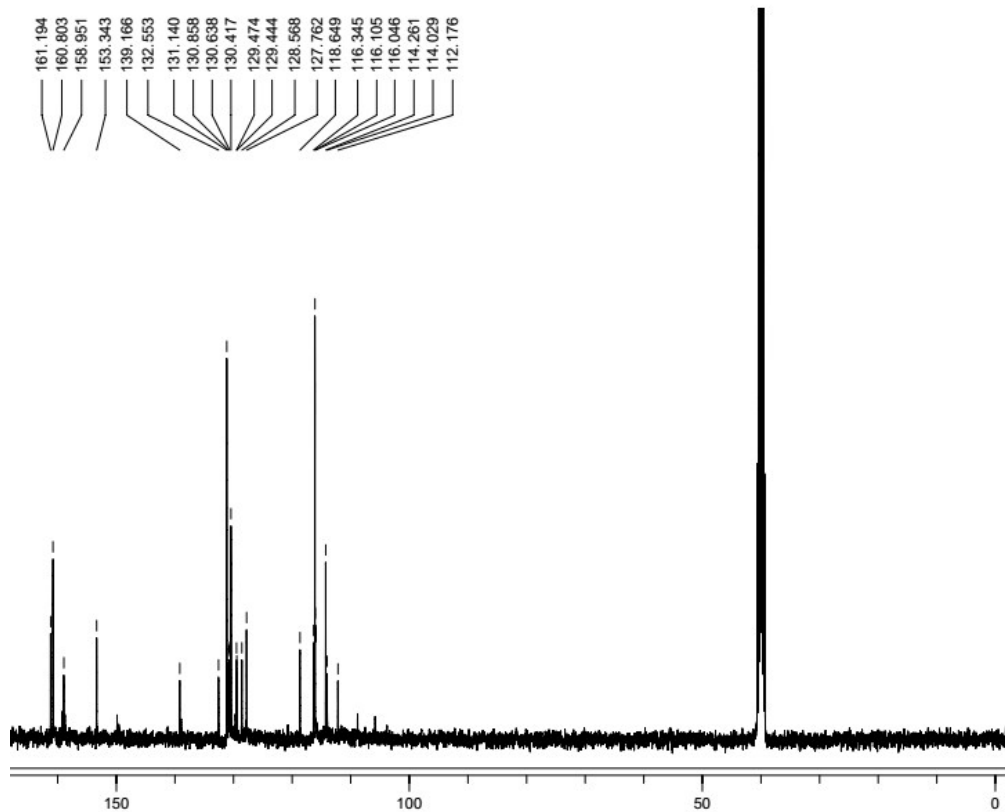

**Target molecule C10**

<sup>1</sup>H-NMR (DMSO-*d*<sub>6</sub>)

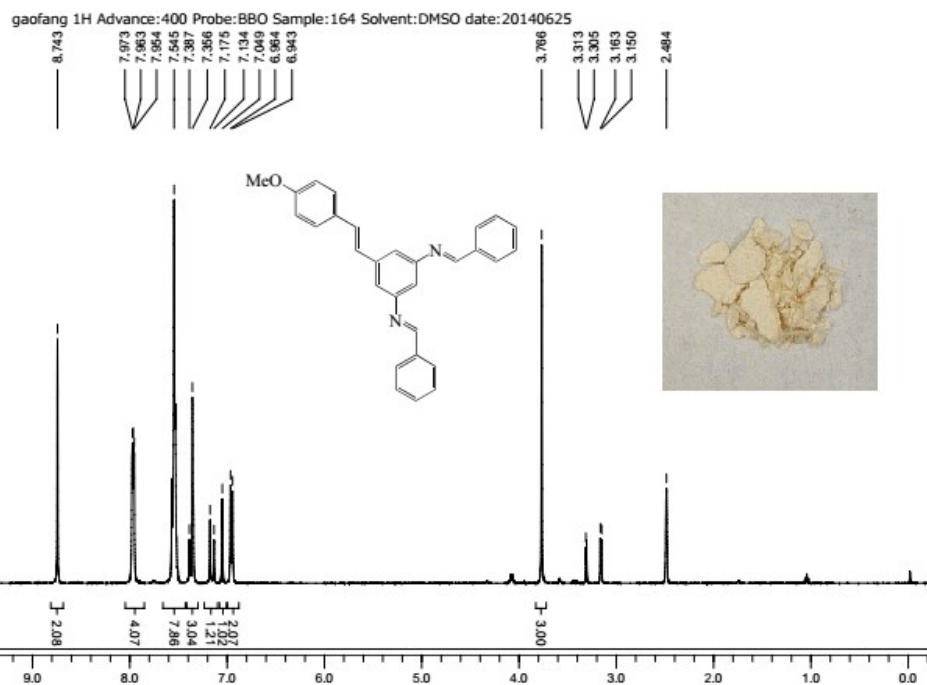

<sup>13</sup>C-NMR (DMSO-*d*<sub>6</sub>)

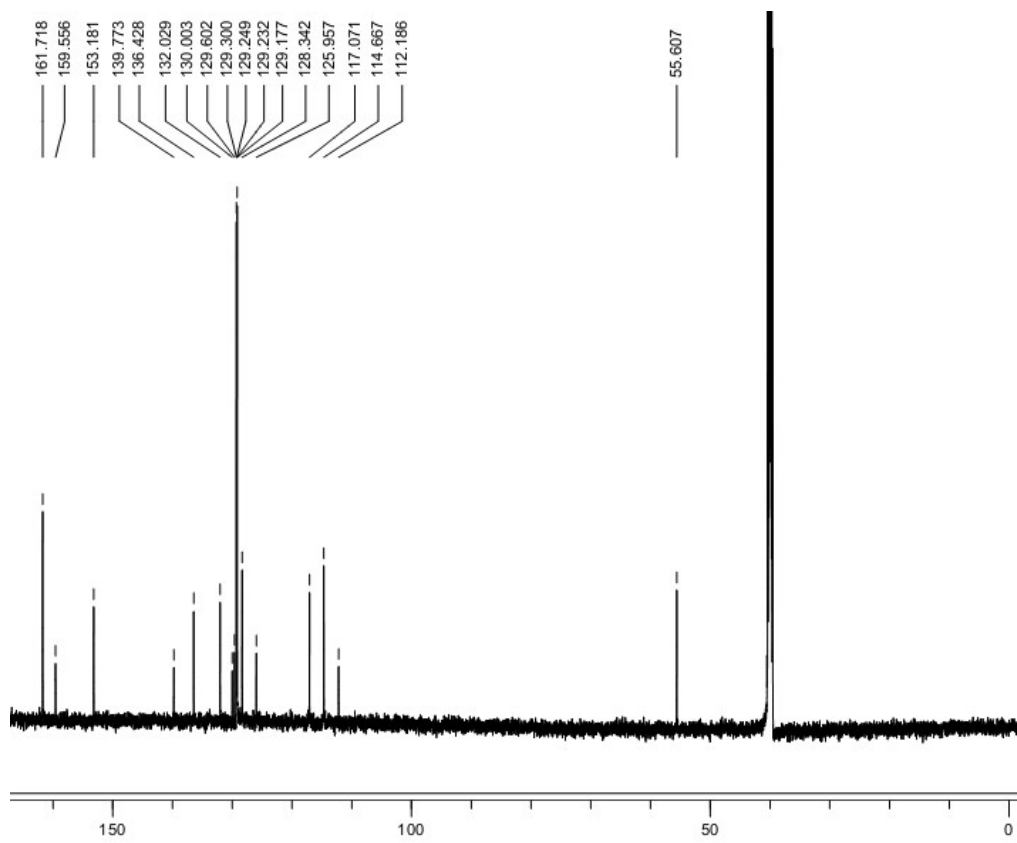

**Target molecule C11**

<sup>1</sup>H-NMR (DMSO-*d*<sub>6</sub>)

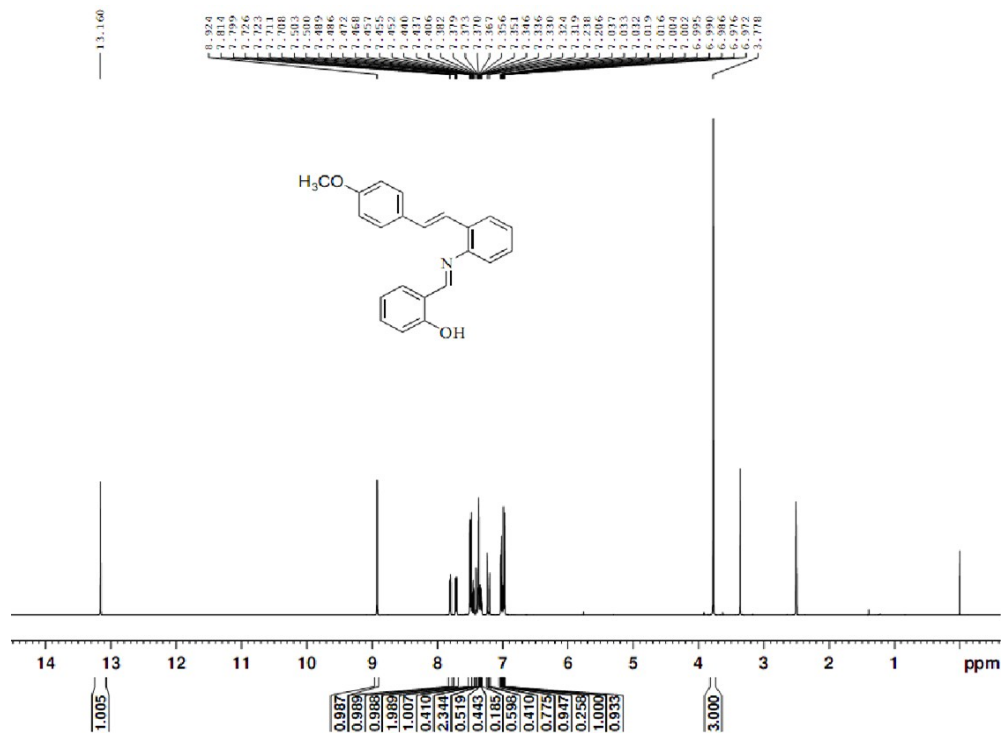

<sup>13</sup>C-NMR (DMSO-*d*<sub>6</sub>)

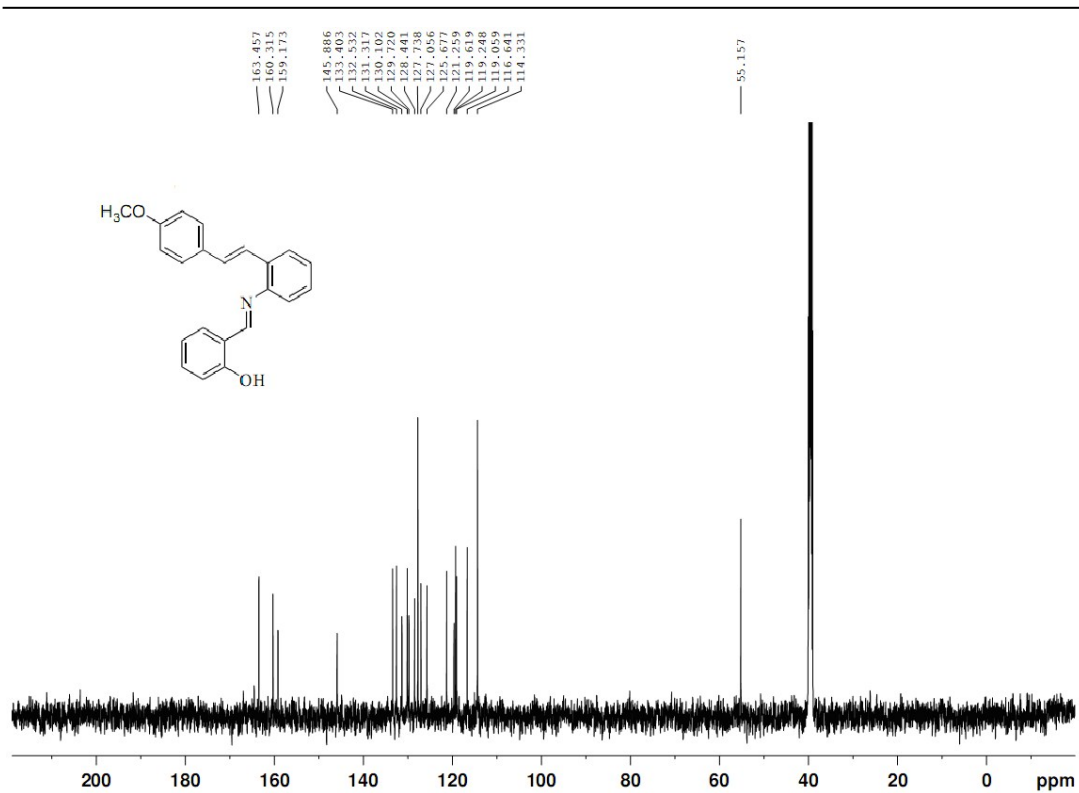

**Target molecule C12**

<sup>1</sup>H-NMR (DMSO-*d*<sub>6</sub>)

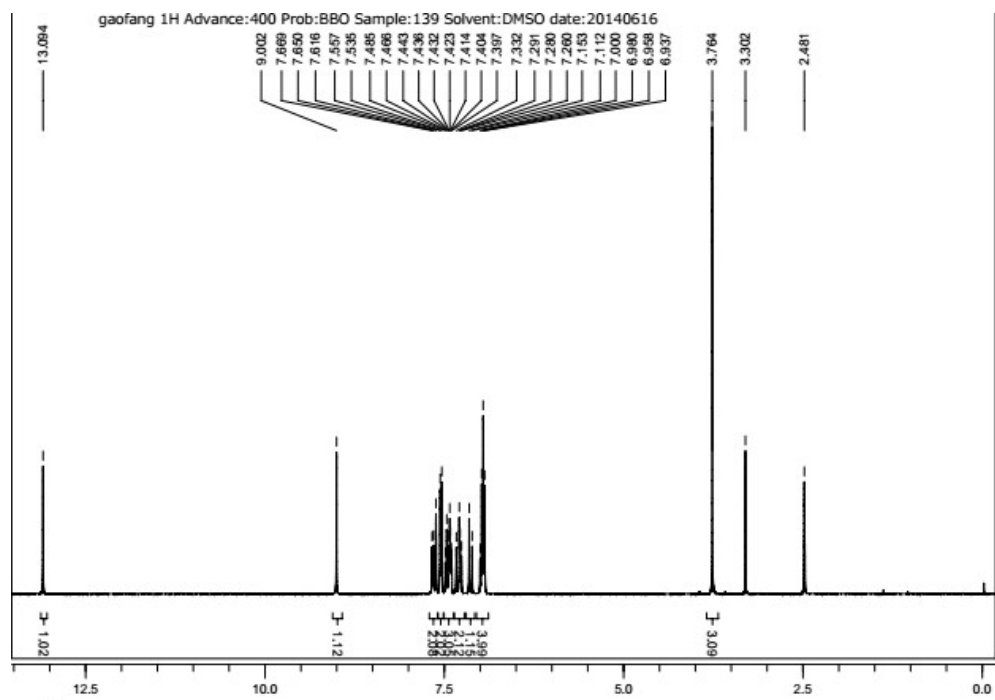

<sup>13</sup>C-NMR (DMSO-*d*<sub>6</sub>)

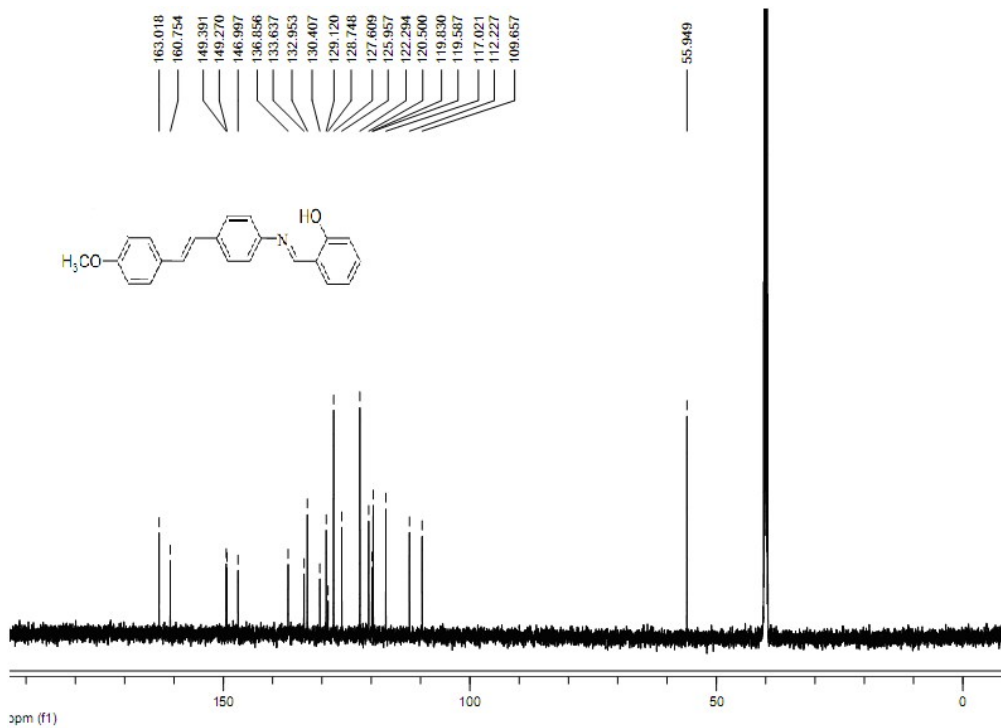

***Target molecule C13***

<sup>1</sup>H-NMR (DMSO-*d*<sub>6</sub>)

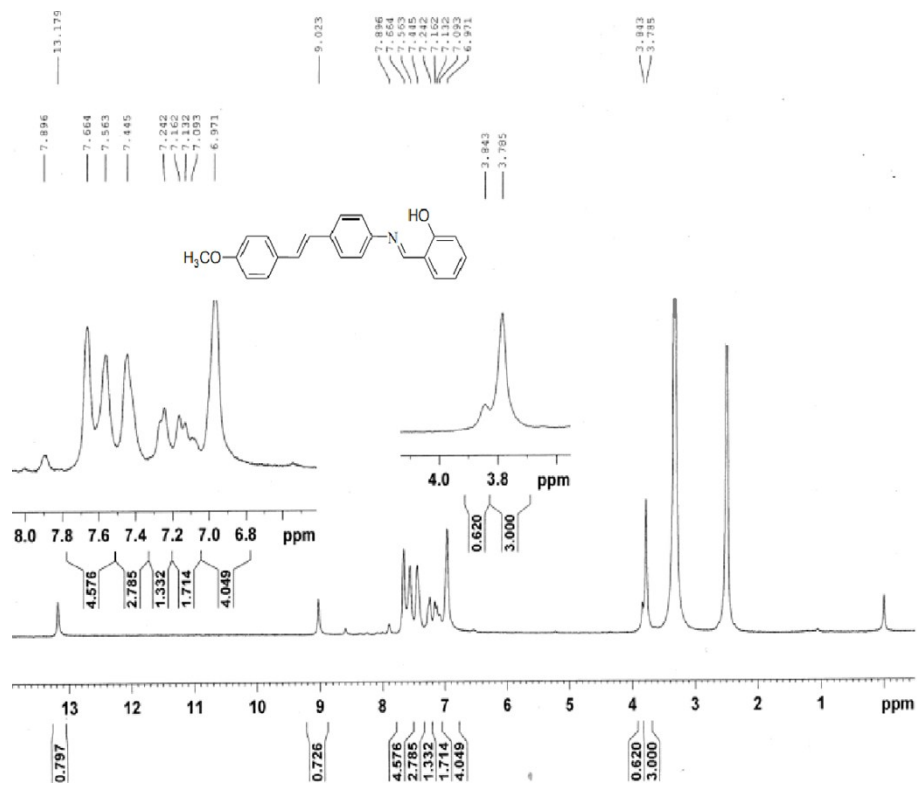

**<sup>13</sup>C-NMR (DMSO-*d*<sub>6</sub>)**

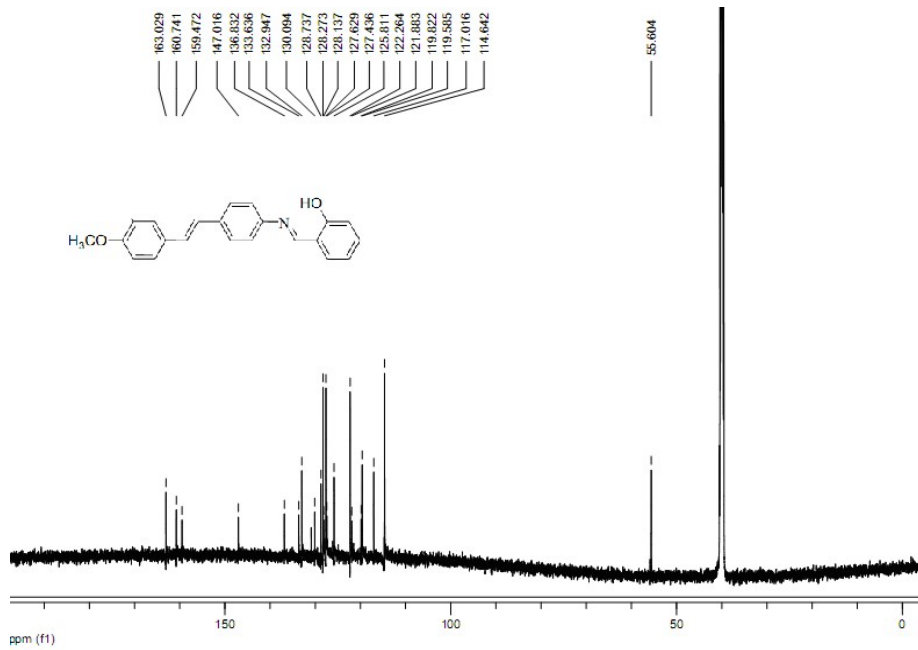

**Target molecule C14**

**<sup>1</sup>H-NMR (DMSO-*d*<sub>6</sub>)**

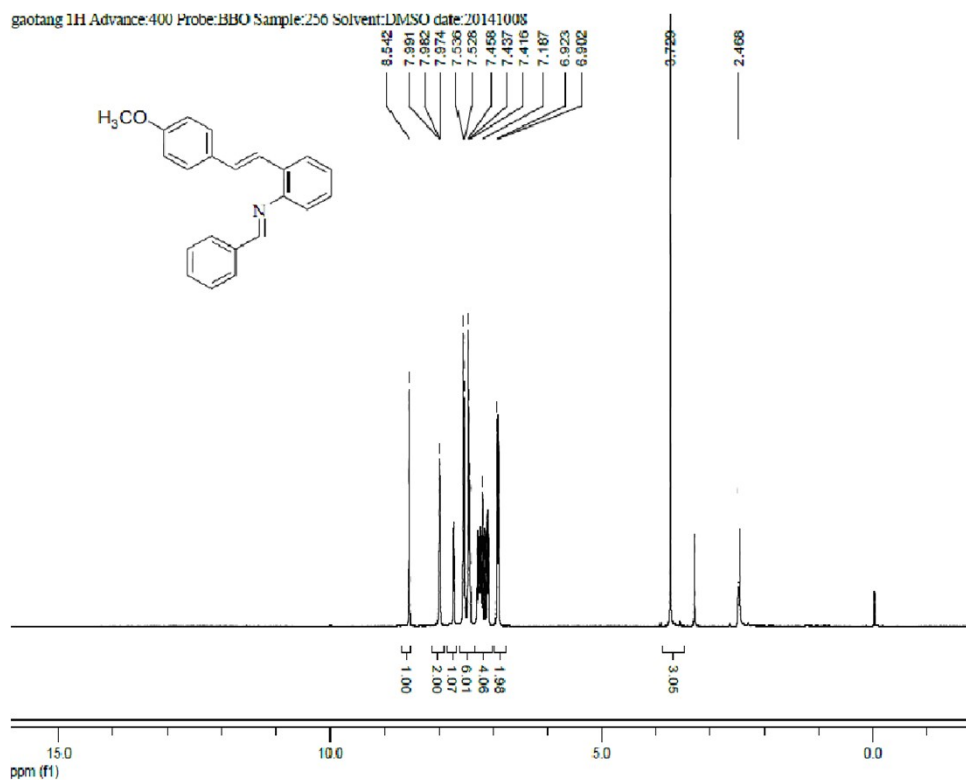

<sup>13</sup>C-NMR (DMSO-d<sub>6</sub>)

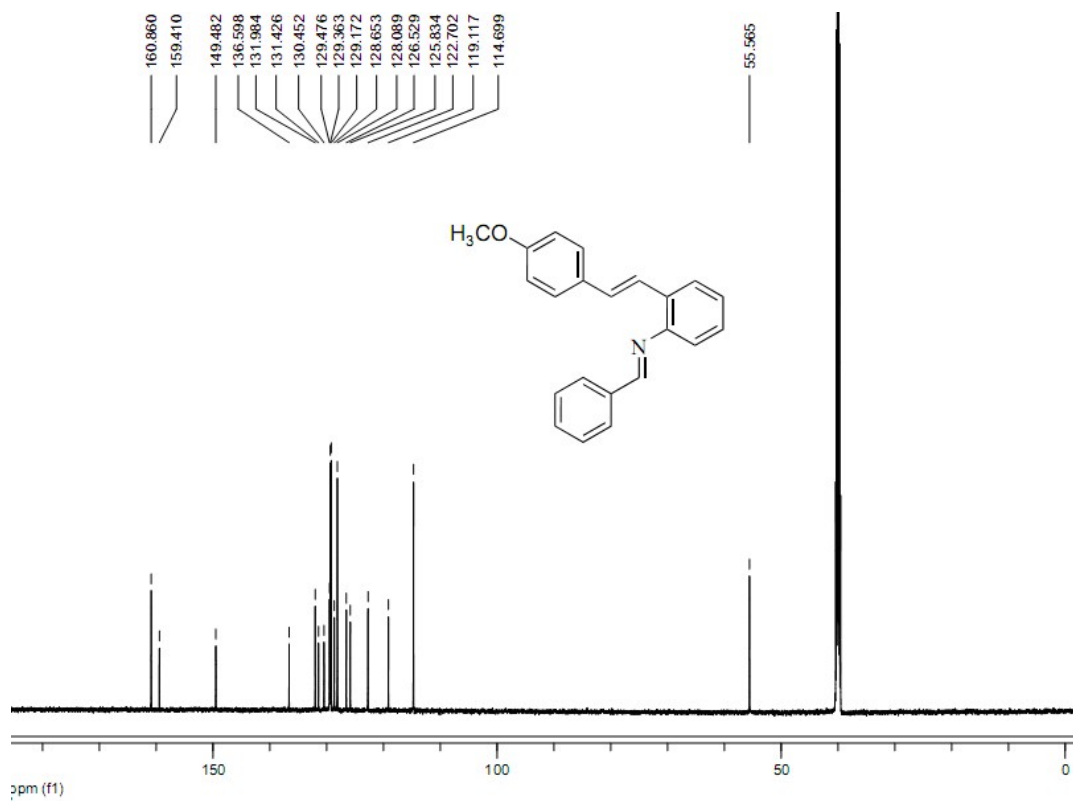

**Target molecule C15**

<sup>1</sup>H-NMR (DMSO-d<sub>6</sub>)

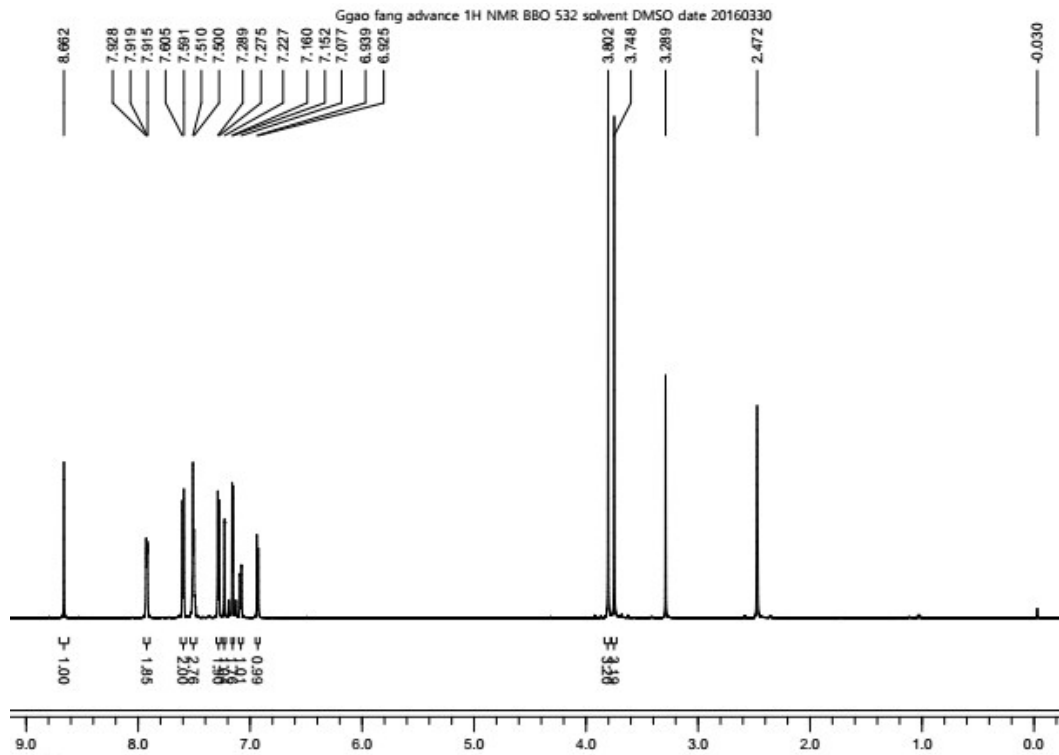

<sup>13</sup>C-NMR (DMSO-*d*<sub>6</sub>)

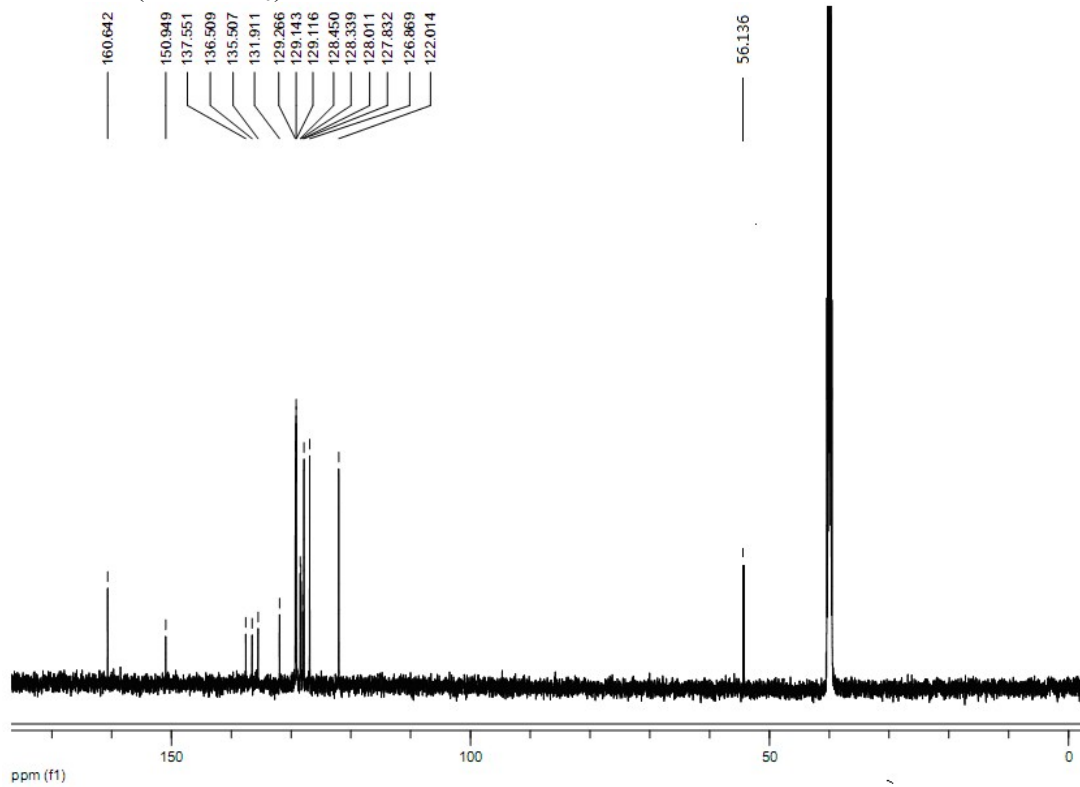

**Target molecule C16**

<sup>1</sup>H-NMR (DMSO-*d*<sub>6</sub>)

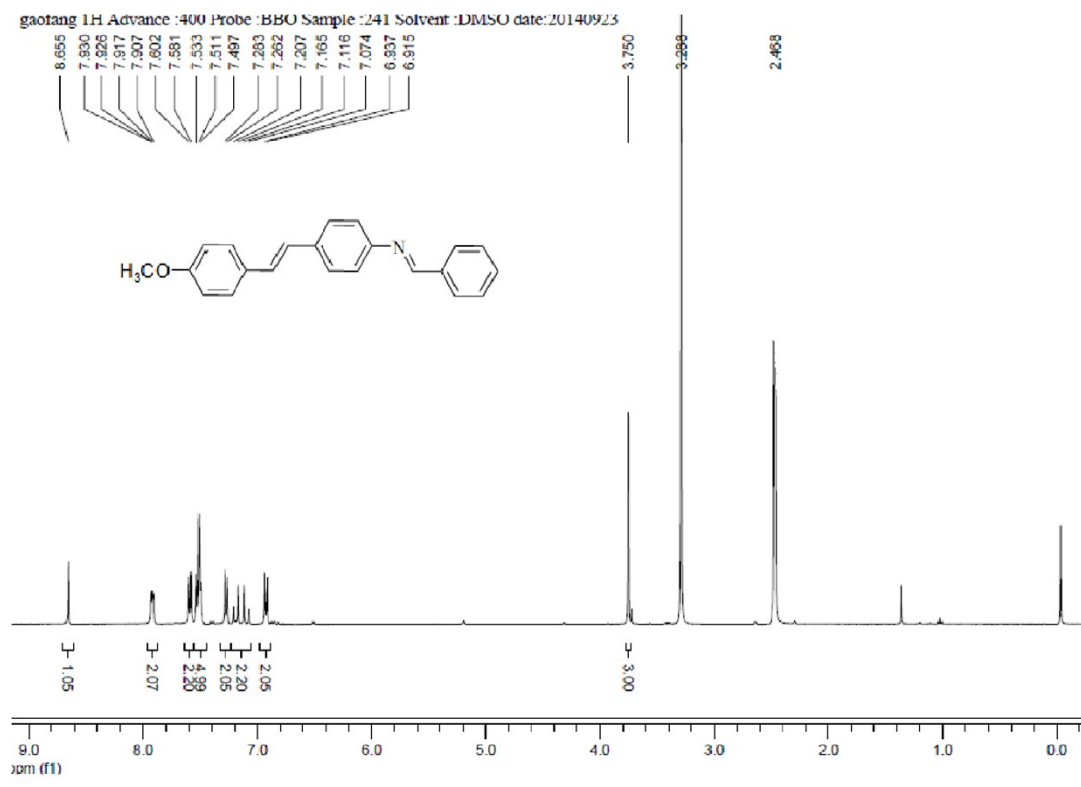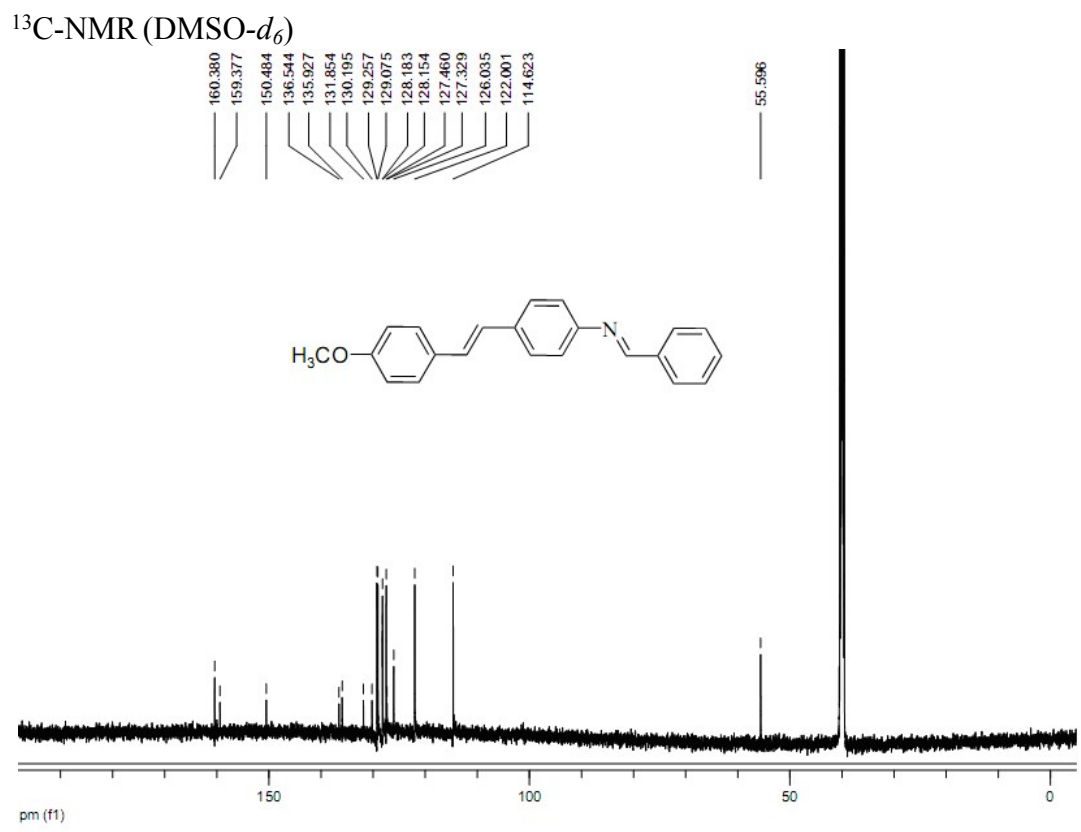

Supplement: c7nr02169k1.pdf [file c7nr02169k1.pdf]
